# Supplementary material
Source: bioRxiv or medRxiv preprint supplement (https://www.biorxiv.org/highwire/filestream/20944/field_highwire_adjunct_files/1/064394-2.pdf)
Supplement: Supplementary file [file 064394-2.pdf]

**Table S2A. Differential abundance of families - Human fecal microbial community**

| baseMean   | log2FoldChai | lfcSE      | stat       | pvalue   | padj     | family              | compare                  |
|------------|--------------|------------|------------|----------|----------|---------------------|--------------------------|
| 8087.80815 | 9.58965882   | 0.59563182 | 16.0999775 | 2.55E-58 | 7.49E-57 | Bifidobacteriaceae  | EasyDNA vs QIAStool      |
| 261.894528 | 9.6387835    | 0.59914643 | 16.0875255 | 3.12E-58 | 7.49E-57 | [Mogibacteriaceae]  | EasyDNA vs QIAStool      |
| 261.894528 | 6.9943178    | 0.50812435 | 13.7649727 | 4.14E-43 | 2.19E-41 | [Mogibacteriaceae]  | EasyDNA vs InnuPURE      |
| 261.894528 | 5.98959231   | 0.47453074 | 12.6221376 | 1.59E-36 | 9.88E-35 | [Mogibacteriaceae]  | EasyDNA vs FastDNA       |
| 261.894528 | 5.68437867   | 0.45525408 | 12.4861675 | 8.88E-36 | 4.26E-34 | [Mogibacteriaceae]  | EasyDNA vs QIAStool+BB   |
| 8087.80815 | 8.06288475   | 0.6580903  | 12.251943  | 1.64E-34 | 4.35E-33 | Bifidobacteriaceae  | EasyDNA vs InnuPURE      |
| 8087.80815 | 8.10323384   | 0.66343913 | 12.2139824 | 2.62E-34 | 1.52E-32 | Bifidobacteriaceae  | EasyDNA vs MagNAPure     |
| 261.894528 | 7.46735031   | 0.63949976 | 11.6768617 | 1.67E-31 | 4.85E-30 | [Mogibacteriaceae]  | EasyDNA vs MagNAPure     |
| 195.592384 | 7.11547535   | 0.63330982 | 11.2353782 | 2.73E-29 | 4.37E-28 | Coriobacteriaceae   | EasyDNA vs QIAStool      |
| 8087.80815 | 8.22252999   | 0.81577634 | 10.0793925 | 6.81E-24 | 3.13E-22 | Bifidobacteriaceae  | EasyDNA vs PowerSoil.HMP |
| 118.367167 | 4.14939619   | 0.43086714 | 9.6303379  | 5.95E-22 | 7.14E-21 | Streptococcaceae    | EasyDNA vs QIAStool      |
| 261.894528 | 6.50010878   | 0.67196014 | 9.67335475 | 3.91E-22 | 9.00E-21 | [Mogibacteriaceae]  | EasyDNA vs PowerSoil.HMP |
| 195.592384 | 6.52674567   | 0.70556721 | 9.25035285 | 2.24E-20 | 3.95E-19 | Coriobacteriaceae   | EasyDNA vs InnuPURE      |
| 8087.80815 | 6.05120873   | 0.6598584  | 9.17046551 | 4.71E-20 | 1.70E-18 | Bifidobacteriaceae  | FastDNA vs QIAStool      |
| 750.272969 | -5.5100567   | 0.62548793 | -8.8092135 | 1.26E-18 | 1.67E-17 | Porphyromonadaceae  | EasyDNA vs InnuPURE      |
| 750.272969 | -4.8876587   | 0.57173354 | -8.5488402 | 1.24E-17 | 1.19E-16 | Porphyromonadaceae  | EasyDNA vs QIAStool      |
| 750.272969 | -5.3905037   | 0.62605815 | -8.6102285 | 7.29E-18 | 1.41E-16 | Porphyromonadaceae  | EasyDNA vs MagNAPure     |
| 195.592384 | 6.37027321   | 0.76210202 | 8.35881943 | 6.33E-17 | 9.19E-16 | Coriobacteriaceae   | EasyDNA vs MagNAPure     |
| 195.592384 | 5.59941114   | 0.66873123 | 8.37318631 | 5.61E-17 | 1.35E-15 | Coriobacteriaceae   | EasyDNA vs QIAStool+BB   |
| 14192.9873 | 4.1205321    | 0.50198036 | 8.20855245 | 2.24E-16 | 1.79E-15 | Ruminococcaceae     | EasyDNA vs QIAStool      |
| 3174.43554 | -3.2374316   | 0.4150328  | -7.8004235 | 6.17E-15 | 9.84E-14 | Veillonellaceae     | FastDNA vs QIAStool      |
| 195.592384 | 5.37934136   | 0.69281817 | 7.76443455 | 8.20E-15 | 9.84E-14 | Coriobacteriaceae   | FastDNA vs QIAStool      |
| 8087.80815 | 5.04874196   | 0.65458206 | 7.71292439 | 1.23E-14 | 1.97E-13 | Bifidobacteriaceae  | EasyDNA vs QIAStool+BB   |
| 195.592384 | 7.26194948   | 0.9934254  | 7.31000989 | 2.67E-13 | 4.10E-12 | Coriobacteriaceae   | EasyDNA vs PowerSoil.HMP |
| 188.732855 | -5.3331196   | 0.7367495  | -7.2387149 | 4.53E-13 | 5.25E-12 | [Barnesiellaceae]   | EasyDNA vs MagNAPure     |
| 3052.94009 | -4.8906164   | 0.69105732 | -7.0770053 | 1.47E-12 | 1.56E-11 | Bacteroidaceae      | EasyDNA vs InnuPURE      |
| 3052.94009 | -4.7809223   | 0.6911788  | -6.9170558 | 4.61E-12 | 4.46E-11 | Bacteroidaceae      | EasyDNA vs MagNAPure     |
| 680.114734 | -5.3983716   | 0.79094213 | -6.8252422 | 8.78E-12 | 7.75E-11 | Pasteurellaceae     | EasyDNA vs InnuPURE      |
| 3052.94009 | -4.2181346   | 0.62453115 | -6.754082  | 1.44E-11 | 9.86E-11 | Bacteroidaceae      | EasyDNA vs QIAStool      |
| 750.272969 | -5.1128      | 0.75653447 | -6.7581851 | 1.40E-11 | 1.61E-10 | Porphyromonadaceae  | EasyDNA vs PowerSoil.HMP |
| 3174.43554 | -3.1274017   | 0.45366454 | -6.8936438 | 5.44E-12 | 2.23E-10 | Veillonellaceae     | FastDNA vs MagNAPure     |
| 118.367167 | 3.1468372    | 0.46933577 | 6.70487405 | 2.02E-11 | 2.42E-10 | Streptococcaceae    | EasyDNA vs QIAStool+BB   |
| 188.732855 | -4.4807982   | 0.6822668  | -6.5675161 | 5.12E-11 | 3.07E-10 | [Barnesiellaceae]   | EasyDNA vs QIAStool      |
| 50.0848862 | -6.0497647   | 0.91762758 | -6.5928322 | 4.32E-11 | 3.58E-10 | [Odoribacteraceae]  | EasyDNA vs MagNAPure     |
| 8087.80815 | -4.5409169   | 0.65998484 | -6.8803351 | 5.97E-12 | 5.73E-10 | Bifidobacteriaceae  | QIAStool vs QIAStool+BB  |
| 12.0964552 | 6.19822102   | 0.96500816 | 6.42297263 | 1.34E-10 | 7.13E-10 | Actinomycetaceae    | EasyDNA vs QIAStool      |
| 118.367167 | 3.04916807   | 0.47421688 | 6.429902   | 1.28E-10 | 9.67E-10 | Streptococcaceae    | EasyDNA vs InnuPURE      |
| 750.272969 | -4.0416602   | 0.62575935 | -6.4588091 | 1.06E-10 | 1.01E-09 | Porphyromonadaceae  | EasyDNA vs QIAStool+BB   |
| 50.0848862 | -5.8312903   | 0.91432374 | -6.3777085 | 1.80E-10 | 1.19E-09 | [Odoribacteraceae]  | EasyDNA vs InnuPURE      |
| 8087.80815 | 4.56478376   | 0.72120492 | 6.32938523 | 2.46E-10 | 5.05E-09 | Bifidobacteriaceae  | FastDNA vs MagNAPure     |
| 188.732855 | -4.5085906   | 0.73616033 | -6.1244683 | 9.10E-10 | 5.36E-09 | [Barnesiellaceae]   | EasyDNA vs InnuPURE      |
| 8087.80815 | 4.52443467   | 0.7163253  | 6.31617319 | 2.68E-10 | 6.19E-09 | Bifidobacteriaceae  | FastDNA vs InnuPURE      |
| 195.592384 | 4.79061167   | 0.75894457 | 6.31220231 | 2.75E-10 | 6.19E-09 | Coriobacteriaceae   | FastDNA vs InnuPURE      |
| 261.894528 | -3.9544048   | 0.64127777 | -6.1664462 | 6.98E-10 | 3.35E-08 | [Mogibacteriaceae]  | QIAStool vs QIAStool+BB  |
| 3174.43554 | 2.51360524   | 0.41567177 | 6.04709158 | 1.47E-09 | 4.57E-08 | Veillonellaceae     | EasyDNA vs FastDNA       |
| 680.114734 | -4.0974239   | 0.72004633 | -5.6905004 | 1.27E-08 | 6.08E-08 | Pasteurellaceae     | EasyDNA vs QIAStool      |
| 52.7372451 | -4.7893782   | 0.84104417 | -5.6945621 | 1.24E-08 | 6.56E-08 | Rikenellaceae       | EasyDNA vs InnuPURE      |
| 680.114734 | -4.5127186   | 0.79165921 | -5.7003298 | 1.20E-08 | 8.67E-08 | Pasteurellaceae     | EasyDNA vs MagNAPure     |
| 55.8474481 | 4.94136357   | 0.85181641 | 5.80097251 | 6.59E-09 | 9.01E-08 | Lactobacillaceae    | FastDNA vs MagNAPure     |
| 195.592384 | 4.63413921   | 0.81137436 | 5.71146864 | 1.12E-08 | 1.15E-07 | Coriobacteriaceae   | FastDNA vs MagNAPure     |
| 118.367167 | 3.5108296    | 0.62265509 | 5.6384821  | 1.72E-08 | 1.58E-07 | Streptococcaceae    | EasyDNA vs PowerSoil.HMP |
| 129.697728 | -2.7013853   | 0.46425926 | -5.8187    | 5.93E-09 | 1.90E-07 | Erysipelotrichaceae | QIAStool vs QIAStool+BB  |
| 261.894528 | 3.6491912    | 0.65484847 | 5.57257343 | 2.51E-08 | 2.26E-07 | [Mogibacteriaceae]  | FastDNA vs QIAStool      |
| 3052.94009 | -4.6400461   | 0.84608129 | -5.4841611 | 4.15E-08 | 3.19E-07 | Bacteroidaceae      | EasyDNA vs PowerSoil.HMP |
| 14192.9873 | 3.01986302   | 0.55817717 | 5.4102231  | 6.29E-08 | 5.04E-07 | Ruminococcaceae     | EasyDNA vs QIAStool+BB   |
| 12.8572515 | 4.68299174   | 0.87546116 | 5.34917137 | 8.84E-08 | 6.36E-07 | Turicibacteraceae   | FastDNA vs QIAStool      |
| 129.697728 | 2.47103163   | 0.46631338 | 5.29907944 | 1.16E-07 | 6.98E-07 | Erysipelotrichaceae | FastDNA vs QIAStool      |
| 14192.9873 | 2.93847088   | 0.55833808 | 5.26288821 | 1.42E-07 | 9.14E-07 | Ruminococcaceae     | EasyDNA vs MagNAPure     |
| 14192.9873 | 2.89591167   | 0.55820633 | 5.18788757 | 2.13E-07 | 1.02E-06 | Ruminococcaceae     | EasyDNA vs InnuPURE      |
| 8087.80815 | 3.53845009   | 0.6544545  | 5.40671674 | 6.42E-08 | 1.06E-06 | Bifidobacteriaceae  | EasyDNA vs FastDNA       |
| 750.272969 | -3.3818974   | 0.62676068 | -5.3958354 | 6.82E-08 | 1.06E-06 | Porphyromonadaceae  | EasyDNA vs FastDNA       |
| 12.0964552 | 5.12847194   | 0.99982132 | 5.12938846 | 2.91E-07 | 1.28E-06 | Actinomycetaceae    | EasyDNA vs InnuPURE      |
| 188.732855 | -4.5189874   | 0.86857022 | -5.2027888 | 1.96E-07 | 1.29E-06 | [Barnesiellaceae]   | EasyDNA vs PowerSoil.HMP |

|            |            |            |            |            |            |                      |                          |
|------------|------------|------------|------------|------------|------------|----------------------|--------------------------|
| 128.300954 | -3.9366676 | 0.7636346  | -5.1551718 | 2.53E-07   | 1.47E-06   | [Paraprevotellaceae] | EasyDNA vs MagNAPure     |
| 52.7372451 | -4.3339548 | 0.84802512 | -5.1106443 | 3.21E-07   | 1.69E-06   | Rikenellaceae        | EasyDNA vs MagNAPure     |
| 8087.80815 | 4.6840799  | 0.86240099 | 5.43144078 | 5.59E-08   | 1.87E-06   | Bifidobacteriaceae   | FastDNA vs PowerSoil.HMP |
| 195.592384 | 5.52581549 | 1.03014075 | 5.36413637 | 8.13E-08   | 1.87E-06   | Coriobacteriaceae    | FastDNA vs PowerSoil.HMP |
| 18839.0105 | -4.1923769 | 0.82982709 | -5.052109  | 4.37E-07   | 1.91E-06   | Prevotellaceae       | EasyDNA vs QIAstool      |
| 833.096381 | -4.9687451 | 0.98221289 | -5.0587252 | 4.22E-07   | 2.04E-06   | Alcaligenaceae       | EasyDNA vs MagNAPure     |
| 3052.94009 | -3.5171962 | 0.69110702 | -5.0892208 | 3.60E-07   | 2.21E-06   | Bacteroidaceae       | EasyDNA vs QIAstool+BB   |
| 188.732855 | -3.7434477 | 0.73628464 | -5.0842398 | 3.69E-07   | 2.21E-06   | [Barnesiellaceae]    | EasyDNA vs QIAstool+BB   |
| 12.0964552 | 4.43642641 | 0.88398443 | 5.0186703  | 5.20E-07   | 2.77E-06   | Actinomycetaceae     | EasyDNA vs QIAstool+BB   |
| 717.960343 | 2.58858006 | 0.5178777  | 4.99843893 | 5.78E-07   | 2.77E-06   | Verrucomicrobiaceae  | EasyDNA vs QIAstool+BB   |
| 55.8474481 | 3.13191814 | 0.62594371 | 5.00351402 | 5.63E-07   | 2.90E-06   | Lactobacillaceae     | FastDNA vs QIAstool      |
| 14192.9873 | 2.87901713 | 0.55820744 | 5.15761149 | 2.50E-07   | 3.10E-06   | Ruminococcaceae      | EasyDNA vs FastDNA       |
| 118.367167 | 2.38319975 | 0.48150613 | 4.94946913 | 7.44E-07   | 3.32E-06   | Streptococcaceae     | EasyDNA vs MagNAPure     |
| 129.697728 | 2.12324888 | 0.43267331 | 4.90727959 | 9.23E-07   | 3.69E-06   | Erysipelotrichaceae  | EasyDNA vs QIAstool      |
| 55.8474481 | 4.67527328 | 0.85115964 | 5.49282774 | 3.96E-08   | 3.80E-06   | Lactobacillaceae     | QIAstool+BB vs MagNAPure |
| 118.367167 | 2.38330929 | 0.46888891 | 5.08288693 | 3.72E-07   | 3.84E-06   | Streptococcaceae     | EasyDNA vs FastDNA       |
| 128.300954 | -3.3578675 | 0.69956976 | -4.7999038 | 1.59E-06   | 5.86E-06   | [Paraprevotellaceae] | EasyDNA vs QIAstool      |
| 52.7372451 | -3.7686587 | 0.79504946 | -4.7401563 | 2.14E-06   | 7.32E-06   | Rikenellaceae        | EasyDNA vs QIAstool      |
| 18839.0105 | -4.359738  | 0.91400032 | -4.7699524 | 1.84E-06   | 7.63E-06   | Prevotellaceae       | EasyDNA vs MagNAPure     |
| 3174.43554 | -2.7465167 | 0.55002666 | -4.9934247 | 5.93E-07   | 9.10E-06   | Veillonellaceae      | FastDNA vs PowerSoil.HMP |
| 128.300954 | -3.603787  | 0.76190786 | -4.7299512 | 2.25E-06   | 9.16E-06   | [Paraprevotellaceae] | EasyDNA vs InnuPURE      |
| 195.592384 | 3.86327715 | 0.72509531 | 5.32795768 | 9.93E-08   | 9.54E-06   | Coriobacteriaceae    | FastDNA vs QIAstool+BB   |
| 50.0848862 | -4.1453968 | 0.88843557 | -4.665951  | 3.07E-06   | 9.83E-06   | [Odoribacteraceae]   | EasyDNA vs QIAstool+BB   |
| 50.0848862 | -4.7429127 | 1.00547833 | -4.717071  | 2.39E-06   | 1.38E-05   | [Odoribacteraceae]   | EasyDNA vs PowerSoil.HMP |
| 50.0848862 | -4.157899  | 0.9175784  | -4.5313829 | 5.86E-06   | 2.56E-05   | [Odoribacteraceae]   | EasyDNA vs QIAstool+BB   |
| 129.697728 | 2.38013376 | 0.4664827  | 5.10229799 | 3.36E-07   | 3.22E-05   | Erysipelotrichaceae  | InnuPURE vs QIAstool     |
| 680.114734 | -4.3059154 | 0.95466001 | -4.5104173 | 6.47E-06   | 3.31E-05   | Pasteurellaceae      | EasyDNA vs PowerSoil.HMP |
| 833.096381 | -3.9165388 | 0.89595272 | -4.3713677 | 1.23E-05   | 3.70E-05   | Alcaligenaceae       | EasyDNA vs QIAstool      |
| 833.096381 | -4.2614855 | 0.98211348 | -4.3390969 | 1.43E-05   | 5.42E-05   | Alcaligenaceae       | EasyDNA vs InnuPURE      |
| 188.732855 | -3.231528  | 0.73880545 | -4.3739905 | 1.22E-05   | 0.00010307 | [Barnesiellaceae]    | EasyDNA vs FastDNA       |
| 12.0964552 | 3.88737674 | 0.89260058 | 4.35511339 | 1.33E-05   | 0.00010307 | Actinomycetaceae     | EasyDNA vs FastDNA       |
| 55.8474481 | -2.8658279 | 0.62501984 | -4.585179  | 4.54E-06   | 0.00010886 | Lactobacillaceae     | QIAstool vs QIAstool+BB  |
| 680.114734 | -3.3086423 | 0.79130163 | -4.1812656 | 2.90E-05   | 0.00011596 | Pasteurellaceae      | EasyDNA vs QIAstool+BB   |
| 24.9775852 | -3.3034167 | 0.79477138 | -4.1564363 | 3.23E-05   | 0.00012499 | S24-7                | EasyDNA vs MagNAPure     |
| 164.683395 | 2.16861441 | 0.52508211 | 4.13004815 | 3.63E-05   | 0.00016321 | Clostridiaceae       | FastDNA vs QIAstool      |
| 3174.43554 | 1.83931522 | 0.41386092 | 4.44428346 | 8.82E-06   | 0.00016932 | Veillonellaceae      | QIAstool vs QIAstool+BB  |
| 52.7372451 | -3.9821991 | 0.96797847 | -4.1139335 | 3.89E-05   | 0.00017893 | Rikenellaceae        | EasyDNA vs PowerSoil.HMP |
| 3174.43554 | -1.9851163 | 0.45364194 | -4.3759541 | 1.21E-05   | 0.00018135 | Veillonellaceae      | FastDNA vs InnuPURE      |
| 50.0848862 | -3.8686456 | 0.92385007 | -4.1875253 | 2.82E-05   | 0.00019428 | [Odoribacteraceae]   | EasyDNA vs FastDNA       |
| 12.8572515 | 4.81248863 | 1.14323741 | 4.20952688 | 2.56E-05   | 0.00020984 | Turicibacteraceae    | FastDNA vs MagNAPure     |
| 52.7372451 | -3.2306201 | 0.84373606 | -3.8289464 | 0.00012869 | 0.00047517 | Rikenellaceae        | EasyDNA vs QIAstool+BB   |
| 12.8572515 | 3.82479629 | 0.94129838 | 4.06331974 | 4.84E-05   | 0.00054427 | Turicibacteraceae    | FastDNA vs InnuPURE      |
| 2.90835369 | 5.801207   | 1.54291246 | 3.75990677 | 0.00016998 | 0.00058278 | Flavobacteriaceae    | EasyDNA vs QIAstool+BB   |
| 24.9775852 | -2.6872704 | 0.73960427 | -3.6333895 | 0.00027972 | 0.0007898  | S24-7                | EasyDNA vs QIAstool      |
| 20.5947041 | -2.5767744 | 0.70109054 | -3.6753803 | 0.0002375  | 0.00086092 | Desulfovibrionaceae  | EasyDNA vs MagNAPure     |
| 118.367167 | 1.7660869  | 0.47972483 | 3.68145821 | 0.0002319  | 0.00092762 | Streptococcaceae     | FastDNA vs QIAstool      |
| 20.5947041 | -2.2850151 | 0.64393127 | -3.5485389 | 0.00038737 | 0.001033   | Desulfovibrionaceae  | EasyDNA vs QIAstool      |
| 8087.80815 | 3.05449188 | 0.72131966 | 4.2345884  | 2.29E-05   | 0.00109906 | Bifidobacteriaceae   | QIAstool+BB vs MagNAPure |
| 717.960343 | 2.05393444 | 0.51665248 | 3.97546612 | 7.02E-05   | 0.00112386 | Verrucomicrobiaceae  | QIAstool vs QIAstool+BB  |
| 717.960343 | 2.34984392 | 0.64833575 | 3.62442444 | 0.00028961 | 0.00121108 | Verrucomicrobiaceae  | EasyDNA vs PowerSoil.HMP |
| 55.8474481 | 3.38899548 | 0.87536361 | 3.87152888 | 0.00010815 | 0.00124378 | Lactobacillaceae     | FastDNA vs PowerSoil.HMP |
| 14192.9873 | 2.47838617 | 0.69245926 | 3.57910753 | 0.00034477 | 0.00132162 | Ruminococcaceae      | EasyDNA vs PowerSoil.HMP |
| 833.096381 | -4.1016476 | 1.16606691 | -3.5175062 | 0.00043562 | 0.00154143 | Alcaligenaceae       | EasyDNA vs PowerSoil.HMP |
| 3052.94009 | -2.5171693 | 0.6913973  | -3.6406987 | 0.0002719  | 0.00156067 | Bacteroidaceae       | EasyDNA vs FastDNA       |
| 55.8474481 | -2.3828644 | 0.6553515  | -3.6360097 | 0.00027689 | 0.00156067 | Lactobacillaceae     | EasyDNA vs FastDNA       |
| 2.90835369 | 5.46873449 | 1.5682075  | 3.48725183 | 0.00048801 | 0.00169597 | Flavobacteriaceae    | EasyDNA vs InnuPURE      |
| 24.9775852 | -2.7362663 | 0.78754989 | -3.4744037 | 0.00051199 | 0.00169597 | S24-7                | EasyDNA vs InnuPURE      |
| 833.096381 | -3.3916737 | 0.98214712 | -3.4533255 | 0.00055372 | 0.00177191 | Alcaligenaceae       | EasyDNA vs QIAstool+BB   |
| 50.0848862 | -2.1811191 | 0.60399625 | -3.6111467 | 0.00030485 | 0.00196263 | [Odoribacteraceae]   | FastDNA vs MagNAPure     |
| 164.683395 | 2.091138   | 0.58305007 | 3.5865496  | 0.00033508 | 0.00196263 | Clostridiaceae       | FastDNA vs MagNAPure     |
| 164.683395 | -1.8905223 | 0.53660316 | -3.5231293 | 0.00042648 | 0.0022035  | Clostridiaceae       | EasyDNA vs FastDNA       |
| 1.64901163 | 5.58253937 | 1.67724193 | 3.32840438 | 0.00087345 | 0.00220661 | Corynebacteriaceae   | EasyDNA vs QIAstool      |
| 680.114734 | -2.7600494 | 0.79209328 | -3.4845004 | 0.00049306 | 0.0023515  | Pasteurellaceae      | EasyDNA vs FastDNA       |
| 18839.0105 | -3.0749852 | 0.91400099 | -3.3643128 | 0.00076735 | 0.00239231 | Prevotellaceae       | EasyDNA vs InnuPURE      |
| 8087.80815 | -3.0141428 | 0.71644091 | -4.2071059 | 2.59E-05   | 0.00248315 | Bifidobacteriaceae   | InnuPURE vs QIAstool+BB  |

|            |            |            |            |            |            |                       |                              |
|------------|------------|------------|------------|------------|------------|-----------------------|------------------------------|
| 11.6781466 | 2.99916116 | 0.92454824 | 3.2439207  | 0.00117897 | 0.00282952 | Staphylococcaceae     | EasyDNA vs QIAstool          |
| 52.7372451 | -2.5787944 | 0.72537335 | -3.555127  | 0.0003778  | 0.00340017 | Rikenellaceae         | FastDNA vs InnuPURE          |
| 717.960343 | 2.18530557 | 0.56391756 | 3.87522171 | 0.00010653 | 0.00350549 | Verrucomicrobiaceae   | FastDNA vs QIAstool+BB       |
| 12.8572515 | 3.50252691 | 0.90541725 | 3.86841197 | 0.00010955 | 0.00350549 | Turicibacteraceae     | FastDNA vs QIAstool+BB       |
| 55.8474481 | -2.1167741 | 0.65447232 | -3.2343219 | 0.00121932 | 0.00365796 | Lactobacillaceae      | EasyDNA vs QIAstool+BB       |
| 128.300954 | -2.9732328 | 0.91355445 | -3.2545765 | 0.00113562 | 0.00373131 | [Paraprevotellaceae]  | EasyDNA vs PowerSoil.HMP     |
| 12.0964552 | 3.6784619  | 1.13856961 | 3.23077471 | 0.00123455 | 0.00378596 | Actinomycetaceae      | EasyDNA vs PowerSoil.HMP     |
| 33.4361572 | 2.81733334 | 0.86547361 | 3.25525042 | 0.00113292 | 0.00386527 | Enterobacteriaceae    | EasyDNA vs MagNAPure         |
| 1.82114912 | 5.23886708 | 1.65581045 | 3.16392923 | 0.00155655 | 0.00402037 | Sphingobacteriaceae   | EasyDNA vs QIAstool+BB       |
| 128.300954 | -2.4114715 | 0.76277926 | -3.1614277 | 0.00156998 | 0.00402037 | [Paraprevotellaceae]  | EasyDNA vs QIAstool+BB       |
| 33.4361572 | 2.54187917 | 0.80503432 | 3.15747925 | 0.0015914  | 0.00402037 | Enterobacteriaceae    | EasyDNA vs QIAstool+BB       |
| 3174.43554 | -1.7292853 | 0.45259586 | -3.8208156 | 0.00013301 | 0.00425635 | Veillonellaceae       | QIAstool+BB vs MagNAPure     |
| 12.0964552 | 2.92089424 | 0.9106931  | 3.20733102 | 0.00133973 | 0.0043169  | Actinomycetaceae      | EasyDNA vs MagNAPure         |
| 261.894528 | 2.6444657  | 0.67913295 | 3.89388516 | 9.87E-05   | 0.00473527 | [Mogibacteriaceae]    | InnuPURE vs QIAstool         |
| 18839.0105 | -3.4408077 | 1.0966717  | -3.1375002 | 0.00170395 | 0.00479902 | Prevotellaceae        | EasyDNA vs PowerSoil.HMP     |
| 2.73031934 | -5.5948167 | 1.78991433 | -3.1257455 | 0.00177355 | 0.00479902 | Aerococcaceae         | EasyDNA vs PowerSoil.HMP     |
| 55.8474481 | 3.46324375 | 0.85610471 | 4.04535067 | 5.22E-05   | 0.00501551 | Lactobacillaceae      | InnuPURE vs MagNAPure        |
| 717.960343 | -2.0716363 | 0.56501412 | -3.6665213 | 0.00024587 | 0.00590094 | Verrucomicrobiaceae   | QIAstool+BB vs MagNAPure     |
| 18839.0105 | -2.7588902 | 0.91399679 | -3.01849   | 0.00254038 | 0.00609691 | Prevotellaceae        | EasyDNA vs QIAstool+BB       |
| 3.42322903 | 4.0050664  | 1.33425048 | 3.00173503 | 0.00268446 | 0.0061359  | Pseudomonadaceae      | EasyDNA vs QIAstool+BB       |
| 750.272969 | -2.1281593 | 0.63659993 | -3.343009  | 0.00082875 | 0.00621564 | Porphyromonadaceae    | FastDNA vs InnuPURE          |
| 50.0848862 | -1.9626447 | 0.59872204 | -3.2780565 | 0.00104524 | 0.00671943 | [Odoribacteraceae]    | FastDNA vs InnuPURE          |
| 55.8474481 | 2.55849915 | 0.84174411 | 3.03952131 | 0.00236954 | 0.00723335 | Lactobacillaceae      | EasyDNA vs MagNAPure         |
| 3052.94009 | -2.3734471 | 0.74564072 | -3.1830975 | 0.00145709 | 0.00779712 | Bacteroidaceae        | FastDNA vs InnuPURE          |
| 680.114734 | -2.6383223 | 0.83401698 | -3.1633915 | 0.00155942 | 0.00779712 | Pasteurellaceae       | FastDNA vs InnuPURE          |
| 261.894528 | 3.13867473 | 0.8067979  | 3.89028617 | 0.00010013 | 0.00795635 | [Mogibacteriaceae]    | PowerSoil.HMP vs QIAstool    |
| 129.697728 | 2.20203213 | 0.58468421 | 3.76619048 | 0.00016576 | 0.00795635 | Erysipelotrichaceae   | PowerSoil.HMP vs QIAstool    |
| 2.73031934 | -5.9403078 | 1.78353589 | -3.3306354 | 0.00086648 | 0.00797162 | Aerococcaceae         | FastDNA vs PowerSoil.HMP     |
| 750.272969 | -2.0086063 | 0.63715947 | -3.1524389 | 0.00161913 | 0.00829803 | Porphyromonadaceae    | FastDNA vs MagNAPure         |
| 12.8572515 | 2.52115646 | 0.87157181 | 2.89265487 | 0.00382001 | 0.00873145 | Turicibacteraceae     | EasyDNA vs QIAstool          |
| 12.8249831 | 2.47583548 | 0.80177935 | 3.08792622 | 0.00201559 | 0.00907013 | Peptostreptococcaceae | FastDNA vs InnuPURE          |
| 12.8572515 | 3.81865729 | 1.18165368 | 3.23162137 | 0.0012309  | 0.0094369  | Turicibacteraceae     | FastDNA vs PowerSoil.HMP     |
| 24.9775852 | -2.6351797 | 0.91756811 | -2.8719173 | 0.0040799  | 0.0104264  | S24-7                 | EasyDNA vs PowerSoil.HMP     |
| 3052.94009 | -2.2637531 | 0.74575245 | -3.0355288 | 0.00240114 | 0.01086238 | Bacteroidaceae        | FastDNA vs MagNAPure         |
| 188.732855 | -2.1015916 | 0.6991929  | -3.0057393 | 0.00264936 | 0.01086238 | [Barnesiellaceae]     | FastDNA vs MagNAPure         |
| 128.300954 | -2.2809055 | 0.7707057  | -2.9595026 | 0.00308136 | 0.01148507 | [Paraprevotellaceae]  | FastDNA vs MagNAPure         |
| 717.960343 | 2.05912098 | 0.56396613 | 3.65114298 | 0.00026108 | 0.01253164 | Verrucomicrobiaceae   | InnuPURE vs QIAstool+BB      |
| 52.7372451 | -2.1233709 | 0.7336022  | -2.8944446 | 0.0037983  | 0.01297752 | Rikenellaceae         | FastDNA vs MagNAPure         |
| 2.90835369 | 4.49112126 | 1.61342038 | 2.78360267 | 0.00537588 | 0.0130153  | Flavobacteriaceae     | EasyDNA vs PowerSoil.HMP     |
| 3174.43554 | 1.11548884 | 0.41450174 | 2.69115597 | 0.00712049 | 0.01529563 | Veillonellaceae       | EasyDNA vs QIAstool+BB       |
| 11.6781466 | 2.68984272 | 1.00310889 | 2.6815062  | 0.00732916 | 0.01529563 | Staphylococcaceae     | EasyDNA vs QIAstool+BB       |
| 129.697728 | -1.7885614 | 0.47769996 | -3.7441104 | 0.00018103 | 0.01536327 | Erysipelotrichaceae   | QIAstool vs MagNAPure        |
| 118.367167 | -1.7661964 | 0.4920531  | -3.5894428 | 0.00033139 | 0.01536327 | Streptococcaceae      | QIAstool vs MagNAPure        |
| 50.0848862 | -1.9043678 | 0.54541108 | -3.4916192 | 0.0004801  | 0.01536327 | [Odoribacteraceae]    | QIAstool vs MagNAPure        |
| 12.8249831 | -2.3955975 | 0.82460766 | -2.9051361 | 0.00367093 | 0.01625699 | Peptostreptococcaceae | EasyDNA vs FastDNA           |
| 833.096381 | -2.9212505 | 1.04951845 | -2.7834198 | 0.00537892 | 0.01696427 | Alcaligenaceae        | FastDNA vs MagNAPure         |
| 8087.80815 | -3.173788  | 0.86249486 | -3.6797762 | 0.00023344 | 0.01712544 | Bifidobacteriaceae    | PowerSoil.HMP vs QIAstool+BB |
| 55.8474481 | -3.1229052 | 0.87472716 | -3.5701477 | 0.00035678 | 0.01712544 | Lactobacillaceae      | PowerSoil.HMP vs QIAstool+BB |
| 11.6781466 | 2.79196033 | 1.02507165 | 2.72367334 | 0.00645603 | 0.01900943 | Staphylococcaceae     | EasyDNA vs InnuPURE          |
| 24.9775852 | -2.0060866 | 0.78814538 | -2.5453256 | 0.01091759 | 0.02183518 | S24-7                 | EasyDNA vs QIAstool+BB       |
| 3.42322903 | -4.3875174 | 1.50304307 | -2.9190896 | 0.00351055 | 0.02298506 | Pseudomonadaceae      | FastDNA vs PowerSoil.HMP     |
| 164.683395 | 1.99810261 | 0.70063696 | 2.85183728 | 0.00434673 | 0.02298506 | Clostridiaceae        | FastDNA vs PowerSoil.HMP     |
| 717.960343 | 1.94656943 | 0.68516789 | 2.84101089 | 0.00449708 | 0.02298506 | Verrucomicrobiaceae   | FastDNA vs PowerSoil.HMP     |
| 1.64901163 | 4.49276703 | 1.71286008 | 2.62296208 | 0.0087169  | 0.025279   | Corynebacteriaceae    | EasyDNA vs MagNAPure         |
| 1.82114912 | 4.39593515 | 1.68839485 | 2.60361796 | 0.00922455 | 0.02547733 | Sphingobacteriaceae   | EasyDNA vs MagNAPure         |
| 24.9775852 | -1.8300403 | 0.6984518  | -2.6201383 | 0.00878941 | 0.02574042 | S24-7                 | FastDNA vs MagNAPure         |
| 50.0848862 | -1.8918656 | 0.59388004 | -3.1856023 | 0.00144453 | 0.02773498 | [Odoribacteraceae]    | QIAstool+BB vs MagNAPure     |
| 1.64901163 | 4.22462547 | 1.68481228 | 2.50747548 | 0.0121597  | 0.02796731 | Corynebacteriaceae    | EasyDNA vs PowerSoil.HMP     |
| 1.82114912 | 4.10868763 | 1.67143497 | 2.45817976 | 0.01396433 | 0.03058852 | Sphingobacteriaceae   | EasyDNA vs PowerSoil.HMP     |
| 195.592384 | 1.736134   | 0.65109372 | 2.66648864 | 0.00766482 | 0.03168125 | Coriobacteriaceae     | EasyDNA vs FastDNA           |
| 3.42322903 | 4.86140167 | 1.48339223 | 3.27721931 | 0.00104835 | 0.03354717 | Pseudomonadaceae      | PowerSoil.HMP vs QIAstool+BB |
| 3.42322903 | 3.53118218 | 1.35773544 | 2.6007881  | 0.00930099 | 0.03403901 | Pseudomonadaceae      | EasyDNA vs FastDNA           |
| 18839.0105 | -2.3758961 | 0.91401379 | -2.5994094 | 0.00933843 | 0.03403901 | Prevotellaceae        | EasyDNA vs FastDNA           |
| 52.7372451 | -2.2105839 | 0.85684169 | -2.579921  | 0.00988229 | 0.03403901 | Rikenellaceae         | EasyDNA vs FastDNA           |
| 750.272969 | -1.5057613 | 0.58394147 | -2.5786168 | 0.00991968 | 0.03571084 | Porphyromonadaceae    | FastDNA vs QIAstool          |

|            |            |            |            |            |            |                      |                           |
|------------|------------|------------|------------|------------|------------|----------------------|---------------------------|
| 33.4361572 | 2.28011708 | 0.9191566  | 2.48066226 | 0.01311386 | 0.03584454 | Enterobacteriaceae   | FastDNA vs MagNAPure      |
| 12.8572515 | -2.1618353 | 0.86641893 | -2.4951386 | 0.0125908  | 0.04108575 | Turicibacteraceae    | EasyDNA vs FastDNA        |
| 20.5947041 | -1.6911916 | 0.69469488 | -2.434438  | 0.01491493 | 0.04160481 | Desulfovibrionaceae  | EasyDNA vs InnuPURE       |
| 3052.94009 | -1.7009654 | 0.68492375 | -2.4834376 | 0.01301211 | 0.0425851  | Bacteroidaceae       | FastDNA vs QIAStool       |
| 3.96627812 | 2.57800029 | 1.13190334 | 2.27757986 | 0.02275162 | 0.04368311 | Comamonadaceae       | EasyDNA vs QIAStool+BB    |
| 128.300954 | -1.9480249 | 0.76899668 | -2.5332033 | 0.01130254 | 0.04623766 | [Paraprevotellaceae] | FastDNA vs InnuPURE       |
| 33.4361572 | 1.66163853 | 0.72289861 | 2.29857756 | 0.02152894 | 0.04635089 | Enterobacteriaceae   | EasyDNA vs QIAStool       |
| 1.29933147 | 3.68974709 | 1.61352576 | 2.28676057 | 0.0222098  | 0.04635089 | Xanthomonadaceae     | EasyDNA vs QIAStool       |
| 33.4361572 | 1.91151815 | 0.80544298 | 2.37325075 | 0.01763229 | 0.04672557 | Enterobacteriaceae   | EasyDNA vs InnuPURE       |
| 128.300954 | -1.7021055 | 0.70735254 | -2.4063043 | 0.01611483 | 0.0483445  | [Paraprevotellaceae] | FastDNA vs QIAStool       |
| 3174.43554 | -1.3981164 | 0.45362294 | -3.0821114 | 0.00205538 | 0.0493291  | Veillonellaceae      | FastDNA vs QIAStool+BB    |
| 12.8572515 | 2.65065335 | 1.14044478 | 2.32422771 | 0.02011329 | 0.05302595 | Turicibacteraceae    | EasyDNA vs MagNAPure      |
| 52.7372451 | -1.5580748 | 0.67048579 | -2.3238    | 0.02013622 | 0.05576183 | Rikenellaceae        | FastDNA vs QIAStool       |
| 50.0848862 | 1.68589343 | 0.53952737 | 3.1247598  | 0.0017795  | 0.0569441  | [Odoribacteraceae]   | InnuPURE vs QIAStool      |
| 20.5947041 | -1.4101301 | 0.61823455 | -2.2808982 | 0.02255447 | 0.05779583 | Desulfovibrionaceae  | FastDNA vs MagNAPure      |
| 3174.43554 | -1.2523153 | 0.41388181 | -3.02578   | 0.00247993 | 0.05951824 | Veillonellaceae      | InnuPURE vs QIAStool      |
| 0.882185   | 4.0371131  | 1.78622755 | 2.26013371 | 0.02381295 | 0.06009936 | Gemellaceae          | EasyDNA vs InnuPURE       |
| 2.90835369 | 2.46128406 | 1.15648797 | 2.12824009 | 0.03331718 | 0.06663437 | Flavobacteriaceae    | EasyDNA vs QIAStool       |
| 14192.9873 | 1.24151496 | 0.55827928 | 2.2238242  | 0.02616027 | 0.06726928 | Ruminococcaceae      | FastDNA vs QIAStool       |
| 12.0964552 | -3.2773268 | 1.09799283 | -2.9848344 | 0.00283732 | 0.06809565 | Actinomycetaceae     | QIAStool vs MagNAPure     |
| 1.64901163 | 3.77525052 | 1.6511205  | 2.2864779  | 0.02222632 | 0.06890158 | Corynebacteriaceae   | EasyDNA vs FastDNA        |
| 1.64901163 | 3.58183657 | 1.63651122 | 2.18870272 | 0.02861845 | 0.06894446 | Corynebacteriaceae   | EasyDNA vs InnuPURE       |
| 164.683395 | 1.34909893 | 0.57279168 | 2.3553047  | 0.01850752 | 0.06940321 | Clostridiaceae       | FastDNA vs InnuPURE       |
| 0.882185   | 4.01816686 | 1.78597331 | 2.24984709 | 0.02445865 | 0.07095808 | Gemellaceae          | EasyDNA vs FastDNA        |
| 1.82114912 | 3.54033456 | 1.58145933 | 2.2386504  | 0.02517867 | 0.07095808 | Sphingobacteriaceae  | EasyDNA vs FastDNA        |
| 2.73031934 | 4.97244546 | 1.63772663 | 3.03618771 | 0.0023959  | 0.07666885 | Aerococcaceae        | PowerSoil.HMP vs QIAStool |
| 1.29933147 | 3.36579674 | 1.65782097 | 2.03025344 | 0.04233078 | 0.07814914 | Xanthomonadaceae     | EasyDNA vs QIAStool+BB    |
| 3052.94009 | -2.1228769 | 0.89019477 | -2.384733  | 0.01709152 | 0.07862099 | Bacteroidaceae       | FastDNA vs PowerSoil.HMP  |
| 261.894528 | 1.477758   | 0.69172546 | 2.136336   | 0.03265204 | 0.07874903 | [Mogibacteriaceae]   | FastDNA vs MagNAPure      |
| 12.0964552 | 2.31084429 | 1.08368228 | 2.13240017 | 0.03297396 | 0.07913751 | Actinomycetaceae     | FastDNA vs QIAStool       |
| 680.114734 | -1.7526692 | 0.83469225 | -2.099779  | 0.03574829 | 0.08142665 | Pasteurellaceae      | FastDNA vs MagNAPure      |
| 128.300954 | -1.6557621 | 0.76773858 | -2.1566743 | 0.03103105 | 0.08364892 | [Paraprevotellaceae] | EasyDNA vs FastDNA        |
| 11.6015749 | -2.2504463 | 1.0243547  | -2.1969405 | 0.0280247  | 0.09112658 | Campylobacteraceae   | FastDNA vs InnuPURE       |
| 55.8474481 | 1.47811982 | 0.67420109 | 2.19240201 | 0.02835049 | 0.09112658 | Lactobacillaceae     | FastDNA vs InnuPURE       |
| 0.882185   | 3.39994624 | 1.70295575 | 1.99649711 | 0.04587984 | 0.09593057 | Gemellaceae          | EasyDNA vs PowerSoil.HMP  |
| 20.5947041 | -1.1183708 | 0.55185161 | -2.0265789 | 0.04270549 | 0.09608736 | Desulfovibrionaceae  | FastDNA vs QIAStool       |
| 833.096381 | -2.0474946 | 0.98295866 | -2.0829916 | 0.03725199 | 0.09623431 | Alcaligenaceae       | EasyDNA vs FastDNA        |
| 1.19877439 | 3.49866232 | 1.81740826 | 1.92508331 | 0.05421894 | 0.09638922 | Cryomorphaceae       | EasyDNA vs QIAStool+BB    |
| 1.82114912 | 3.1528737  | 1.55024005 | 2.0337971  | 0.04197206 | 0.09671822 | Sphingobacteriaceae  | EasyDNA vs InnuPURE       |
| 18839.0105 | -1.9838419 | 0.98946509 | -2.004964  | 0.04496689 | 0.09703382 | Prevotellaceae       | FastDNA vs MagNAPure      |
| 2.73031934 | -3.6259805 | 1.69469176 | -2.1396106 | 0.03238625 | 0.09715874 | Aerococcaceae        | FastDNA vs InnuPURE       |
| 2.90835369 | 2.67380324 | 1.29756082 | 2.06063809 | 0.03933758 | 0.0975572  | Flavobacteriaceae    | EasyDNA vs FastDNA        |
| 11.6781466 | 2.16807721 | 1.05257629 | 2.05978154 | 0.03941943 | 0.0977461  | Staphylococcaceae    | EasyDNA vs MagNAPure      |
| 0.882185   | 3.61138826 | 1.76237664 | 2.04915804 | 0.04044666 | 0.0977461  | Gemellaceae          | EasyDNA vs MagNAPure      |
| 833.096381 | -2.2139909 | 1.04942688 | -2.1097143 | 0.03488297 | 0.09810835 | Alcaligenaceae       | FastDNA vs InnuPURE       |
| 3174.43554 | -0.7238264 | 0.37173907 | -1.9471356 | 0.05151847 | 0.09891547 | Veillonellaceae      | EasyDNA vs QIAStool       |
| 18839.0105 | -1.8164808 | 0.91354221 | -1.9883929 | 0.04676826 | 0.09903866 | Prevotellaceae       | FastDNA vs QIAStool       |
| 750.272969 | -1.7309025 | 0.76559114 | -2.2608707 | 0.02376727 | 0.09939039 | Porphyromonadaceae   | FastDNA vs PowerSoil.HMP  |
| 188.732855 | -1.2492702 | 0.64121456 | -1.9482873 | 0.0513806  | 0.09998639 | [Barnesiellaceae]    | FastDNA vs QIAStool       |
| 833.096381 | -1.8690442 | 0.97057026 | -1.9257176 | 0.05413965 | 0.09998639 | Alcaligenaceae       | FastDNA vs QIAStool       |
| 24.9775852 | -1.213894  | 0.63403122 | -1.9145651 | 0.05554799 | 0.09998639 | S24-7                | FastDNA vs QIAStool       |

**Table S2B. Differential abundance of families - Pig fecal microbial community**

| baseMean   | log2FoldChai | lfcSE      | stat       | pvalue    | padj      | family                | compare                      |
|------------|--------------|------------|------------|-----------|-----------|-----------------------|------------------------------|
| 6226.33527 | 8.23337231   | 0.2901671  | 28.3745898 | 4.16E-177 | 2.96E-175 | Turicibacteraceae     | FastDNA vs QIAStool          |
| 6226.33527 | -8.9600238   | 0.31794514 | -28.181037 | 9.99E-175 | 7.99E-173 | Turicibacteraceae     | EasyDNA vs FastDNA           |
| 1329.00016 | -7.3100807   | 0.26522532 | -27.561776 | 3.20E-167 | 1.28E-165 | Peptostreptococcaceae | EasyDNA vs FastDNA           |
| 1329.00016 | 6.29759341   | 0.23184427 | 27.1630318 | 1.78E-162 | 6.31E-161 | Peptostreptococcaceae | FastDNA vs QIAStool          |
| 6226.33527 | 9.16361787   | 0.33891741 | 27.0379083 | 5.30E-161 | 3.44E-159 | Turicibacteraceae     | FastDNA vs MagNAPure         |
| 1329.00016 | 6.95674527   | 0.26345927 | 26.4053921 | 1.19E-153 | 6.18E-152 | Peptostreptococcaceae | FastDNA vs InnuPURE          |
| 1329.00016 | 6.24786129   | 0.26803077 | 23.310239  | 3.49E-120 | 1.13E-118 | Peptostreptococcaceae | FastDNA vs MagNAPure         |
| 6226.33527 | 8.37938709   | 0.35930749 | 23.3209362 | 2.72E-120 | 1.88E-118 | Turicibacteraceae     | FastDNA vs PowerSoil.HMP     |
| 14966.648  | -7.3777612   | 0.32913136 | -22.415856 | 2.76E-111 | 7.35E-110 | Clostridiaceae        | EasyDNA vs FastDNA           |
| 6226.33527 | 6.98112067   | 0.31642099 | 22.0627609 | 7.20E-108 | 1.87E-106 | Turicibacteraceae     | FastDNA vs InnuPURE          |
| 1329.00016 | 6.57818334   | 0.30059891 | 21.8835905 | 3.72E-106 | 1.28E-104 | Peptostreptococcaceae | FastDNA vs PowerSoil.HMP     |
| 1329.00016 | 6.11331273   | 0.30715449 | 19.903055  | 3.83E-88  | 2.18E-86  | Peptostreptococcaceae | FastDNA vs QIAStool+BB       |
| 14966.648  | 7.01386817   | 0.36120224 | 19.4181191 | 5.42E-84  | 1.25E-82  | Clostridiaceae        | FastDNA vs PowerSoil.HMP     |
| 14966.648  | 6.69216818   | 0.34940405 | 19.153093  | 9.12E-82  | 1.58E-80  | Clostridiaceae        | FastDNA vs InnuPURE          |
| 14966.648  | 6.16102466   | 0.34985453 | 17.6102467 | 2.06E-69  | 4.45E-68  | Clostridiaceae        | FastDNA vs MagNAPure         |
| 14966.648  | 5.44539513   | 0.318726   | 17.0848791 | 1.92E-65  | 4.55E-64  | Clostridiaceae        | FastDNA vs QIAStool          |
| 6226.33527 | 6.27791748   | 0.38345515 | 16.3719732 | 3.03E-60  | 8.64E-59  | Turicibacteraceae     | FastDNA vs QIAStool+BB       |
| 14966.648  | 5.80051888   | 0.42495209 | 13.6498186 | 2.02E-42  | 3.85E-41  | Clostridiaceae        | FastDNA vs QIAStool+BB       |
| 254.614729 | -2.6451948   | 0.27545666 | -9.6029437 | 7.77E-22  | 5.05E-20  | S24-7                 | InnuPURE vs QIAStool         |
| 35.1041071 | 2.34749529   | 0.28446002 | 8.25246117 | 1.55E-16  | 1.18E-14  | Peptococcaceae        | EasyDNA vs QIAStool          |
| 576.775751 | 2.79069511   | 0.38546037 | 7.23990142 | 4.49E-13  | 8.98E-12  | Streptococcaceae      | EasyDNA vs FastDNA           |
| 408.703374 | 3.64804379   | 0.50165879 | 7.27196224 | 3.54E-13  | 3.51E-11  | Lactobacillaceae      | EasyDNA vs MagNAPure         |
| 254.614729 | -1.8657731   | 0.26216238 | -7.1168605 | 1.10E-12  | 4.20E-11  | S24-7                 | EasyDNA vs QIAStool          |
| 6226.33527 | 2.88570039   | 0.40420787 | 7.13914937 | 9.39E-13  | 1.09E-10  | Turicibacteraceae     | QIAStool+BB vs MagNAPure     |
| 576.775751 | 2.21032995   | 0.32171271 | 6.87050862 | 6.40E-12  | 1.62E-10  | Streptococcaceae      | EasyDNA vs QIAStool          |
| 2576.15115 | -2.3625033   | 0.3468527  | -6.8112582 | 9.67E-12  | 1.72E-10  | [Paraprevotellaceae]  | FastDNA vs QIAStool          |
| 6226.33527 | -2.6821064   | 0.38685912 | -6.9330312 | 4.12E-12  | 2.06E-10  | Turicibacteraceae     | EasyDNA vs QIAStool+BB       |
| 576.775751 | 2.51571595   | 0.36417115 | 6.90805937 | 4.91E-12  | 2.43E-10  | Streptococcaceae      | EasyDNA vs MagNAPure         |
| 35.1041071 | 2.71384929   | 0.40707004 | 6.66678715 | 2.61E-11  | 8.63E-10  | Peptococcaceae        | EasyDNA vs MagNAPure         |
| 14966.648  | -1.9323661   | 0.29731783 | -6.4993278 | 8.07E-11  | 1.53E-09  | Clostridiaceae        | EasyDNA vs QIAStool          |
| 576.775751 | -2.5501711   | 0.41120073 | -6.201767  | 5.58E-10  | 7.26E-09  | Streptococcaceae      | FastDNA vs InnuPURE          |
| 6226.33527 | 2.1824972    | 0.34136207 | 6.39349657 | 1.62E-10  | 8.92E-09  | Turicibacteraceae     | InnuPURE vs MagNAPure        |
| 22.9687795 | -4.1589171   | 0.64930852 | -6.4051478 | 1.50E-10  | 9.46E-09  | Helicobacteraceae     | EasyDNA vs InnuPURE          |
| 254.614729 | -1.8689828   | 0.30680193 | -6.0918223 | 1.12E-09  | 1.59E-08  | S24-7                 | FastDNA vs QIAStool          |
| 254.614729 | -1.8826504   | 0.30472804 | -6.1781333 | 6.49E-10  | 1.78E-08  | S24-7                 | InnuPURE vs MagNAPure        |
| 1019.42191 | -2.9556395   | 0.49110705 | -6.0183202 | 1.76E-09  | 1.83E-08  | Campylobacteraceae    | FastDNA vs InnuPURE          |
| 6226.33527 | -1.9789032   | 0.32055255 | -6.1734127 | 6.68E-10  | 2.11E-08  | Turicibacteraceae     | EasyDNA vs InnuPURE          |
| 408.703374 | 3.99766567   | 0.64482803 | 6.19958424 | 5.66E-10  | 3.28E-08  | Lactobacillaceae      | QIAStool+BB vs MagNAPure     |
| 22.9687795 | 3.05927367   | 0.51002005 | 5.99834003 | 1.99E-09  | 6.48E-08  | Helicobacteraceae     | InnuPURE vs QIAStool         |
| 576.775751 | 2.27519194   | 0.39134713 | 5.81374372 | 6.11E-09  | 1.12E-07  | Streptococcaceae      | InnuPURE vs MagNAPure        |
| 62.3051996 | -3.6585641   | 0.613405   | -5.9643533 | 2.46E-09  | 1.87E-07  | Enterobacteriaceae    | EasyDNA vs PowerSoil.HMP     |
| 408.703374 | 2.43422116   | 0.43645264 | 5.57728586 | 2.44E-08  | 3.71E-07  | Lactobacillaceae      | EasyDNA vs QIAStool          |
| 576.775751 | 1.96980595   | 0.35224663 | 5.59212148 | 2.24E-08  | 4.86E-07  | Streptococcaceae      | InnuPURE vs QIAStool         |
| 2576.15115 | -1.9272471   | 0.34922351 | -5.5186637 | 3.42E-08  | 2.22E-06  | [Paraprevotellaceae]  | PowerSoil.HMP vs QIAStool    |
| 216.46708  | 6.27411432   | 1.18075226 | 5.31365855 | 1.07E-07  | 3.22E-06  | Bacteroidaceae        | PowerSoil.HMP vs QIAStool    |
| 62.3051996 | 2.92721007   | 0.55710414 | 5.25433196 | 1.49E-07  | 3.22E-06  | Enterobacteriaceae    | PowerSoil.HMP vs QIAStool    |
| 367.01539  | -2.774783    | 0.54483681 | -5.09287   | 3.53E-07  | 3.63E-06  | Spirochaetaceae       | FastDNA vs QIAStool          |
| 7308.6798  | -1.2094339   | 0.23761089 | -5.0899766 | 3.58E-07  | 3.63E-06  | Prevotellaceae        | FastDNA vs QIAStool          |
| 71.0660634 | -2.1428817   | 0.41434301 | -5.1717579 | 2.32E-07  | 3.77E-06  | Alcaligenaceae        | InnuPURE vs QIAStool         |
| 7308.6798  | 1.22465113   | 0.23872154 | 5.13004044 | 2.90E-07  | 4.63E-06  | Prevotellaceae        | EasyDNA vs FastDNA           |
| 62.3051996 | -3.2981065   | 0.61505214 | -5.3623202 | 8.22E-08  | 4.85E-06  | Enterobacteriaceae    | InnuPURE vs PowerSoil.HMP    |
| 2516.24433 | 1.09546943   | 0.21932759 | 4.99467231 | 5.89E-07  | 5.11E-06  | Ruminococcaceae       | FastDNA vs InnuPURE          |
| 6226.33527 | -1.9554548   | 0.36446037 | -5.3653428 | 8.08E-08  | 5.98E-06  | Turicibacteraceae     | QIAStool vs QIAStool+BB      |
| 35.1041071 | 1.49262726   | 0.29814049 | 5.00645612 | 5.54E-07  | 7.21E-06  | Peptococcaceae        | InnuPURE vs QIAStool         |
| 408.703374 | 2.70224502   | 0.53923011 | 5.01130217 | 5.41E-07  | 7.43E-06  | Lactobacillaceae      | InnuPURE vs MagNAPure        |
| 1019.42191 | -2.2116186   | 0.45182578 | -4.8948483 | 9.84E-07  | 8.73E-06  | Campylobacteraceae    | FastDNA vs QIAStool          |
| 88.4317884 | 3.06001619   | 0.6165416  | 4.96319502 | 6.93E-07  | 9.25E-06  | Coriobacteriaceae     | EasyDNA vs FastDNA           |
| 254.614729 | -1.514942    | 0.30301081 | -4.9996301 | 5.74E-07  | 9.33E-06  | S24-7                 | PowerSoil.HMP vs QIAStool    |
| 62.3051996 | 3.74759308   | 0.72291645 | 5.18399201 | 2.17E-07  | 9.99E-06  | Enterobacteriaceae    | PowerSoil.HMP vs QIAStool+BB |
| 7308.6798  | -1.1800909   | 0.23943127 | -4.928725  | 8.28E-07  | 1.08E-05  | Prevotellaceae        | PowerSoil.HMP vs QIAStool    |
| 35.1041071 | 1.93628224   | 0.38058991 | 5.0875816  | 3.63E-07  | 1.23E-05  | Peptococcaceae        | EasyDNA vs PowerSoil.HMP     |
| 22.9687795 | -3.5480864   | 0.70506262 | -5.0322997 | 4.85E-07  | 1.23E-05  | Helicobacteraceae     | EasyDNA vs PowerSoil.HMP     |
| 2516.24433 | -1.1212344   | 0.22183279 | -5.0544122 | 4.32E-07  | 1.27E-05  | Ruminococcaceae       | InnuPURE vs PowerSoil.HMP    |
| 7308.6798  | 1.19530817   | 0.24053344 | 4.96940538 | 6.72E-07  | 1.28E-05  | Prevotellaceae        | EasyDNA vs PowerSoil.HMP     |
| 6226.33527 | -2.1014696   | 0.42138725 | -4.9870271 | 6.13E-07  | 1.41E-05  | Turicibacteraceae     | PowerSoil.HMP vs QIAStool+BB |
| 14966.648  | -1.568473    | 0.33252325 | -4.7168823 | 2.39E-06  | 2.59E-05  | Clostridiaceae        | PowerSoil.HMP vs QIAStool    |
| 254.614729 | 1.65814449   | 0.33449335 | 4.95718218 | 7.15E-07  | 2.65E-05  | S24-7                 | QIAStool vs QIAStool+BB      |
| 2576.15115 | -1.5902241   | 0.34177933 | -4.6527802 | 3.27E-06  | 3.55E-05  | [Paraprevotellaceae]  | InnuPURE vs QIAStool         |

|            |            |            |            |            |            |                            |                              |
|------------|------------|------------|------------|------------|------------|----------------------------|------------------------------|
| 35.1041071 | 3.04129082 | 0.65712892 | 4.62814943 | 3.69E-06   | 4.22E-05   | Peptococcaceae             | EasyDNA vs FastDNA           |
| 367.01539  | -2.2519712 | 0.48760528 | -4.6184307 | 3.87E-06   | 4.47E-05   | Spirochaetaceae            | EasyDNA vs QIAstool          |
| 42.1528852 | 3.57440506 | 0.77612071 | 4.60547568 | 4.12E-06   | 4.47E-05   | Bifidobacteriaceae         | EasyDNA vs QIAstool          |
| 30.2465249 | 5.96837557 | 1.30932681 | 4.55835437 | 5.16E-06   | 4.79E-05   | Verrucomicrobiaceae        | PowerSoil.HMP vs QIAstool    |
| 71.0660634 | -2.5632064 | 0.56711788 | -4.5197066 | 6.19E-06   | 4.89E-05   | Alcaligenaceae             | FastDNA vs QIAstool          |
| 1019.42191 | -2.3003618 | 0.49644019 | -4.6337139 | 3.59E-06   | 6.20E-05   | Campylobacteraceae         | FastDNA vs PowerSoil.HMP     |
| 216.46708  | 6.67995824 | 1.44979616 | 4.60751549 | 4.08E-06   | 6.25E-05   | Bacteroidaceae             | PowerSoil.HMP vs QIAstool+BB |
| 2516.24433 | -0.98295   | 0.21745846 | -4.5201736 | 6.18E-06   | 6.80E-05   | Ruminococcaceae            | InnuPURE vs MagNAPure        |
| 408.703374 | -2.783843  | 0.59619079 | -4.6693829 | 3.02E-06   | 7.45E-05   | Lactobacillaceae           | QIAstool vs QIAstool+BB      |
| 35.1041071 | 1.85898126 | 0.41668134 | 4.46139786 | 8.14E-06   | 7.46E-05   | Peptococcaceae             | InnuPURE vs MagNAPure        |
| 908.726526 | -1.6630925 | 0.37476149 | -4.4377359 | 9.09E-06   | 8.64E-05   | Veillonellaceae            | EasyDNA vs QIAstool          |
| 408.703374 | 2.48203872 | 0.54739067 | 4.53430954 | 5.78E-06   | 9.39E-05   | Lactobacillaceae           | FastDNA vs MagNAPure         |
| 42.1528852 | 4.04263564 | 0.88466376 | 4.56968603 | 4.88E-06   | 0.00010258 | Bifidobacteriaceae         | EasyDNA vs InnuPURE          |
| 810.892629 | -2.4775883 | 0.57438549 | -4.3134592 | 1.61E-05   | 0.00011411 | Erysipelotrichaceae        | FastDNA vs QIAstool          |
| 576.775751 | 1.69015115 | 0.37888619 | 4.4608413  | 8.16E-06   | 0.00012409 | Streptococcaceae           | EasyDNA vs PowerSoil.HMP     |
| 367.01539  | -2.2701322 | 0.52308917 | -4.339857  | 1.43E-05   | 0.00013239 | Spirochaetaceae            | InnuPURE vs QIAstool         |
| 29.6083625 | 1.69887968 | 0.38157423 | 4.45229143 | 8.50E-06   | 0.00013381 | [Mogibacteriaceae]         | EasyDNA vs InnuPURE          |
| 88.4317884 | -2.803111  | 0.63669121 | -4.4026225 | 1.07E-05   | 0.00013904 | Coriobacteriaceae          | FastDNA vs MagNAPure         |
| 6226.33527 | 1.25225163 | 0.2930255  | 4.27352444 | 1.92E-05   | 0.00015633 | Turicibacteraceae          | InnuPURE vs QIAstool         |
| 23.2927606 | 8.01906524 | 1.88146584 | 4.26213705 | 2.02E-05   | 0.00016452 | Aerococcaceae              | PowerSoil.HMP vs QIAstool    |
| 22.9687795 | 2.448443   | 0.58021396 | 4.21989674 | 2.44E-05   | 0.00017652 | Helicobacteraceae          | PowerSoil.HMP vs QIAstool    |
| 32.5255849 | 5.81457361 | 1.39301324 | 4.17409788 | 2.99E-05   | 0.00019446 | Staphylococcaceae          | PowerSoil.HMP vs QIAstool    |
| 367.01539  | -2.2707797 | 0.54976209 | -4.1304771 | 3.62E-05   | 0.00021392 | Spirochaetaceae            | PowerSoil.HMP vs QIAstool    |
| 71.0660634 | -1.6777577 | 0.39962713 | -4.1983078 | 2.69E-05   | 0.00022709 | Alcaligenaceae             | EasyDNA vs QIAstool          |
| 75.3501469 | -3.3526702 | 0.78701599 | -4.2599773 | 2.04E-05   | 0.0002576  | Mycoplasmataceae           | EasyDNA vs InnuPURE          |
| 22.9687795 | -2.9648076 | 0.67504024 | -4.3920458 | 1.12E-05   | 0.00027792 | Helicobacteraceae          | EasyDNA vs MagNAPure         |
| 17.2832685 | -2.2084726 | 0.53750076 | -4.1087804 | 3.98E-05   | 0.00028727 | Desulfovibrionaceae        | InnuPURE vs QIAstool         |
| 30.2465249 | 6.56938288 | 1.56924588 | 4.18633114 | 2.83E-05   | 0.00032602 | Verrucomicrobiaceae        | PowerSoil.HMP vs QIAstool+BB |
| 15.8153467 | 4.63369833 | 1.14552937 | 4.04502795 | 5.23E-05   | 0.00033768 | Moraxellaceae              | FastDNA vs QIAstool          |
| 7308.6798  | 1.26879368 | 0.29728884 | 4.26788197 | 1.97E-05   | 0.00036507 | Prevotellaceae             | QIAstool vs QIAstool+BB      |
| 32.5255849 | 5.54202541 | 1.38556172 | 3.99984016 | 6.34E-05   | 0.00037503 | Staphylococcaceae          | FastDNA vs QIAstool          |
| 1329.00016 | -1.0124872 | 0.24978175 | -4.0534877 | 5.05E-05   | 0.00038349 | Peptostreptococcaceae      | EasyDNA vs QIAstool          |
| 1019.42191 | 1.93983364 | 0.47935342 | 4.04677127 | 5.19E-05   | 0.00040801 | Campylobacteraceae         | InnuPURE vs MagNAPure        |
| 7308.6798  | 1.28401094 | 0.29817511 | 4.3062311  | 1.66E-05   | 0.00041515 | Prevotellaceae             | EasyDNA vs QIAstool+BB       |
| 576.775751 | -2.0306009 | 0.48938134 | -4.1493222 | 3.33E-05   | 0.00047518 | Streptococcaceae           | FastDNA vs QIAstool+BB       |
| 15.4343002 | 1.53247414 | 0.38535741 | 3.97676056 | 6.99E-05   | 0.00048267 | Corynebacteriaceae         | EasyDNA vs QIAstool          |
| 31.9177507 | -3.2697252 | 0.83566211 | -3.912736  | 9.13E-05   | 0.0004984  | Succinivibrionaceae        | FastDNA vs QIAstool          |
| 5.3314072  | 4.35405821 | 1.11876983 | 3.89182661 | 9.95E-05   | 0.00053892 | [Methanomassiliococcaceae] | PowerSoil.HMP vs QIAstool    |
| 14966.648  | -1.2467731 | 0.31964806 | -3.9004556 | 9.60E-05   | 0.0005811  | Clostridiaceae             | InnuPURE vs QIAstool         |
| 2516.24433 | -0.771523  | 0.19809811 | -3.8946512 | 9.83E-05   | 0.0005811  | Ruminococcaceae            | InnuPURE vs QIAstool         |
| 216.46708  | 5.5853327  | 1.27809173 | 4.37005621 | 1.24E-05   | 0.00064592 | Bacteroidaceae             | PowerSoil.HMP vs MagNAPure   |
| 62.3051996 | 2.61404432 | 0.62207451 | 4.20214024 | 2.64E-05   | 0.00068745 | Enterobacteriaceae         | PowerSoil.HMP vs MagNAPure   |
| 2576.15115 | -1.514051  | 0.37895822 | -3.995298  | 6.46E-05   | 0.00069997 | [Paraprevotellaceae]       | FastDNA vs MagNAPure         |
| 2516.24433 | 0.80433271 | 0.20244058 | 3.97317915 | 7.09E-05   | 0.00074466 | Ruminococcaceae            | EasyDNA vs InnuPURE          |
| 22.9687795 | -2.8972138 | 0.74038877 | -3.913098  | 9.11E-05   | 0.0009112  | Helicobacteraceae          | EasyDNA vs FastDNA           |
| 42.1528852 | 3.64689481 | 0.9520937  | 3.83039483 | 0.00012794 | 0.0009504  | Bifidobacteriaceae         | FastDNA vs InnuPURE          |
| 42.1528852 | 3.17866423 | 0.85340488 | 3.72468483 | 0.00019556 | 0.00099177 | Bifidobacteriaceae         | FastDNA vs QIAstool          |
| 88.4317884 | 1.56076323 | 0.41573031 | 3.75426855 | 0.00017385 | 0.00110104 | Coriobacteriaceae          | EasyDNA vs QIAstool          |
| 88.4317884 | 1.78168807 | 0.46431042 | 3.83727784 | 0.00012441 | 0.00111965 | Coriobacteriaceae          | EasyDNA vs InnuPURE          |
| 35.1041071 | -1.3708732 | 0.34666006 | -3.9545174 | 7.67E-05   | 0.001135   | Peptococcaceae             | QIAstool vs QIAstool+BB      |
| 1019.42191 | -1.6885426 | 0.44454014 | -3.798403  | 0.00014563 | 0.00114685 | Campylobacteraceae         | EasyDNA vs InnuPURE          |
| 2576.15115 | 1.67665813 | 0.42907776 | 3.90758571 | 9.32E-05   | 0.00114975 | [Paraprevotellaceae]       | QIAstool vs QIAstool+BB      |
| 22.9687795 | -2.9199313 | 0.73813187 | -3.9558396 | 7.63E-05   | 0.00127111 | Helicobacteraceae          | EasyDNA vs QIAstool+BB       |
| 7.44045113 | 2.81616091 | 0.73648989 | 3.82376043 | 0.00013143 | 0.00138942 | Anaeroplasmataceae         | QIAstool vs QIAstool+BB      |
| 2576.15115 | 1.31919125 | 0.34980343 | 3.77123584 | 0.00016244 | 0.00144392 | [Paraprevotellaceae]       | EasyDNA vs FastDNA           |
| 14966.648  | -1.5772423 | 0.40923926 | -3.8540836 | 0.00011616 | 0.00145205 | Clostridiaceae             | EasyDNA vs QIAstool+BB       |
| 6226.33527 | 1.39826642 | 0.36161179 | 3.86676115 | 0.00011029 | 0.0016201  | Turicibacteraceae          | InnuPURE vs PowerSoil.HMP    |
| 20.723165  | -5.185472  | 1.34638073 | -3.8514158 | 0.00011744 | 0.0016201  | Pseudomonadaceae           | InnuPURE vs PowerSoil.HMP    |
| 71.0660634 | -1.8593941 | 0.49253655 | -3.7751394 | 0.00015992 | 0.0016201  | Alcaligenaceae             | InnuPURE vs PowerSoil.HMP    |
| 216.46708  | -4.7736527 | 1.26699265 | -3.7677036 | 0.00016476 | 0.0016201  | Bacteroidaceae             | InnuPURE vs PowerSoil.HMP    |
| 216.46708  | -4.9350175 | 1.29105875 | -3.8224577 | 0.00013213 | 0.00182337 | Bacteroidaceae             | FastDNA vs PowerSoil.HMP     |
| 810.892629 | -2.373461  | 0.62905633 | -3.7730501 | 0.00016126 | 0.00185453 | Erysipelotrichaceae        | FastDNA vs PowerSoil.HMP     |
| 1329.00016 | -1.1967679 | 0.32086779 | -3.7297852 | 0.00019164 | 0.00191643 | Peptostreptococcaceae      | EasyDNA vs QIAstool+BB       |
| 9.6383629  | -2.1679125 | 0.6068059  | -3.5726621 | 0.00035337 | 0.00206586 | Fibrobacteraceae           | EasyDNA vs QIAstool          |
| 15.4343002 | 1.84120962 | 0.50412692 | 3.65227395 | 0.00025993 | 0.00216607 | Corynebacteriaceae         | EasyDNA vs QIAstool+BB       |
| 71.0660634 | -1.6471299 | 0.4610371  | -3.5726625 | 0.00035337 | 0.00242942 | Alcaligenaceae             | InnuPURE vs MagNAPure        |
| 216.46708  | -4.4629635 | 1.20206834 | -3.7127369 | 0.00020503 | 0.00259705 | Bacteroidaceae             | EasyDNA vs PowerSoil.HMP     |
| 254.614729 | -1.1032288 | 0.29278195 | -3.7680902 | 0.0001645  | 0.002651   | S24-7                      | EasyDNA vs MagNAPure         |
| 1329.00016 | -1.0622194 | 0.28366823 | -3.7445834 | 0.00018069 | 0.002651   | Peptostreptococcaceae      | EasyDNA vs MagNAPure         |
| 15.4343002 | 1.90293704 | 0.50943828 | 3.73536328 | 0.00018744 | 0.002651   | Corynebacteriaceae         | EasyDNA vs MagNAPure         |

|            |            |            |            |            |            |                            |                              |
|------------|------------|------------|------------|------------|------------|----------------------------|------------------------------|
| 71.0660634 | -2.2797188 | 0.62584767 | -3.6426097 | 0.00026989 | 0.00266032 | Alcaligenaceae             | FastDNA vs PowerSoil.HMP     |
| 14966.648  | -1.2167365 | 0.33050128 | -3.6814881 | 0.00023188 | 0.00286947 | Clostridiaceae             | EasyDNA vs MagNAPure         |
| 576.775751 | 1.44962715 | 0.4050545  | 3.57884468 | 0.00034512 | 0.00290884 | Streptococcaceae           | InnuPURE vs PowerSoil.HMP    |
| 86.5992792 | 2.99949869 | 0.85659517 | 3.5016526  | 0.00046238 | 0.00300548 | Porphyromonadaceae         | FastDNA vs InnuPURE          |
| 4.16403335 | 5.96645628 | 1.75160616 | 3.4062773  | 0.00065855 | 0.00311715 | Carnobacteriaceae          | FastDNA vs QIAStool          |
| 15.8153467 | 5.10720894 | 1.40712282 | 3.62954026 | 0.00028393 | 0.00323676 | Moraxellaceae              | FastDNA vs QIAStool+BB       |
| 15.4343002 | 1.94734349 | 0.53872155 | 3.61474956 | 0.00030064 | 0.00326407 | Corynebacteriaceae         | EasyDNA vs PowerSoil.HMP     |
| 15.4343002 | 1.5357668  | 0.43958903 | 3.4936422  | 0.00047648 | 0.00333535 | Corynebacteriaceae         | EasyDNA vs InnuPURE          |
| 15.8153467 | 4.25898236 | 1.24098327 | 3.43194181 | 0.00059928 | 0.00346248 | Moraxellaceae              | FastDNA vs InnuPURE          |
| 62.3051996 | -2.2078122 | 0.62740538 | -3.5189565 | 0.00043325 | 0.00346598 | Enterobacteriaceae         | EasyDNA vs FastDNA           |
| 75.3501469 | -2.899597  | 0.86109053 | -3.3673544 | 0.00075893 | 0.00394644 | Mycoplasmataceae           | FastDNA vs InnuPURE          |
| 2576.15115 | -1.0433121 | 0.30923781 | -3.3738179 | 0.00074133 | 0.00402438 | [Paraprevotellaceae]       | EasyDNA vs QIAStool          |
| 23.2927606 | 6.98533528 | 1.92158786 | 3.63518912 | 0.00027778 | 0.00426411 | Aerococcaceae              | PowerSoil.HMP vs MagNAPure   |
| 30.2465249 | 5.15082886 | 1.43392754 | 3.59211237 | 0.00032801 | 0.00426411 | Verrucomicrobiaceae        | PowerSoil.HMP vs MagNAPure   |
| 30.2465249 | -4.7520422 | 1.38719877 | -3.425639  | 0.00061336 | 0.00452349 | Verrucomicrobiaceae        | InnuPURE vs PowerSoil.HMP    |
| 408.703374 | 1.97172535 | 0.56084378 | 3.51564092 | 0.00043869 | 0.00456242 | Lactobacillaceae           | PowerSoil.HMP vs MagNAPure   |
| 35.1041071 | -2.1864228 | 0.662999   | -3.2977769 | 0.00097454 | 0.00460689 | Peptococcaceae             | FastDNA vs InnuPURE          |
| 29.6083625 | -1.3718487 | 0.40734356 | -3.3677929 | 0.00075772 | 0.00463054 | [Mogibacteriaceae]         | InnuPURE vs MagNAPure        |
| 254.614729 | -1.1302528 | 0.33388242 | -3.3851821 | 0.00071131 | 0.00466304 | S24-7                      | InnuPURE vs PowerSoil.HMP    |
| 35.1041071 | 1.73722724 | 0.45243877 | 3.83969578 | 0.00012319 | 0.00476323 | Peptococcaceae             | QIAStool+BB vs MagNAPure     |
| 4.00044772 | 5.78336799 | 1.78215296 | 3.24515803 | 0.00117385 | 0.0050867  | Cytophagaceae              | FastDNA vs InnuPURE          |
| 1574.16355 | 1.17263609 | 0.35784849 | 3.27690659 | 0.00104951 | 0.00524755 | Lachnospiraceae            | PowerSoil.HMP vs QIAStool    |
| 71.0660634 | -2.0674546 | 0.60167145 | -3.4361853 | 0.00058997 | 0.00547827 | Alcaligenaceae             | FastDNA vs MagNAPure         |
| 29.6083625 | 1.43379183 | 0.42701614 | 3.35769937 | 0.00078594 | 0.00561386 | [Mogibacteriaceae]         | EasyDNA vs QIAStool+BB       |
| 23.2927606 | -6.4898889 | 1.90765791 | -3.4020192 | 0.0006689  | 0.00576926 | Aerococcaceae              | FastDNA vs PowerSoil.HMP     |
| 29.6083625 | 1.05593006 | 0.32473651 | 3.25165181 | 0.00114736 | 0.00581332 | [Mogibacteriaceae]         | EasyDNA vs InnuPURE          |
| 908.726526 | -1.4420041 | 0.41614103 | -3.4651814 | 0.00052987 | 0.00582861 | Veillonellaceae            | EasyDNA vs MagNAPure         |
| 5.3314072  | -4.298708  | 1.25525218 | -3.4245772 | 0.00061576 | 0.00584969 | [Methanomassiliicoccaceae] | EasyDNA vs PowerSoil.HMP     |
| 576.775751 | 1.75562174 | 0.47291523 | 3.71233916 | 0.00020535 | 0.00595522 | Streptococcaceae           | QIAStool+BB vs MagNAPure     |
| 32.5255849 | 4.24277218 | 1.31620267 | 3.22349458 | 0.00126637 | 0.00601524 | Staphylococcaceae          | EasyDNA vs QIAStool          |
| 88.4317884 | 1.85557658 | 0.56238288 | 3.29948979 | 0.00096861 | 0.0060538  | Coriobacteriaceae          | EasyDNA vs QIAStool+BB       |
| 254.614729 | -1.1064385 | 0.33329617 | -3.3196856 | 0.00090119 | 0.00703253 | S24-7                      | FastDNA vs MagNAPure         |
| 7308.6798  | -0.8575932 | 0.26003373 | -3.2980077 | 0.00097373 | 0.00703253 | Prevotellaceae             | FastDNA vs MagNAPure         |
| 5.3314072  | 3.37108488 | 1.05056705 | 3.2088241  | 0.00133279 | 0.00721928 | [Methanomassiliicoccaceae] | InnuPURE vs QIAStool         |
| 42.1528852 | -3.1585672 | 0.98137257 | -3.21852   | 0.00128854 | 0.00760239 | Bifidobacteriaceae         | InnuPURE vs PowerSoil.HMP    |
| 408.703374 | 1.67631844 | 0.50776167 | 3.3013883  | 0.00096208 | 0.0081242  | Lactobacillaceae           | EasyDNA vs PowerSoil.HMP     |
| 576.775751 | -1.4502357 | 0.44128745 | -3.2863743 | 0.00101486 | 0.00856339 | Streptococcaceae           | QIAStool vs QIAStool+BB      |
| 908.726526 | 1.66195963 | 0.50683851 | 3.27907132 | 0.00104149 | 0.00856339 | Veillonellaceae            | QIAStool vs QIAStool+BB      |
| 20.723165  | 4.83629545 | 1.47007325 | 3.28983298 | 0.00100247 | 0.00922271 | Pseudomonadaceae           | PowerSoil.HMP vs QIAStool+BB |
| 408.703374 | 1.48842239 | 0.47936509 | 3.10498703 | 0.00190287 | 0.00951437 | Lactobacillaceae           | InnuPURE vs QIAStool         |
| 367.01539  | 2.08867133 | 0.64924642 | 3.2170702  | 0.00129507 | 0.00958351 | Spirochaetaceae            | QIAStool vs QIAStool+BB      |
| 4.00044772 | 4.90531979 | 1.59999884 | 3.06582709 | 0.00217069 | 0.00963243 | Cytophagaceae              | FastDNA vs QIAStool          |
| 23.2927606 | -6.0628195 | 1.88263038 | -3.2203982 | 0.00128013 | 0.00972896 | Aerococcaceae              | EasyDNA vs PowerSoil.HMP     |
| 15.8153467 | 4.05506684 | 1.27803736 | 3.172886   | 0.00150932 | 0.00981057 | Moraxellaceae              | FastDNA vs MagNAPure         |
| 88.4317884 | -1.5247829 | 0.49109684 | -3.1048518 | 0.00190374 | 0.01047059 | Coriobacteriaceae          | InnuPURE vs MagNAPure        |
| 5.3314072  | -3.7627421 | 1.19345081 | -3.1528255 | 0.00161698 | 0.0108779  | [Methanomassiliicoccaceae] | QIAStool vs QIAStool+BB      |
| 42.1528852 | 2.69033662 | 0.88649264 | 3.03480989 | 0.00240687 | 0.01117477 | Bifidobacteriaceae         | PowerSoil.HMP vs QIAStool    |
| 23.2927606 | 6.07256394 | 1.92001451 | 3.16276981 | 0.00156276 | 0.01192028 | Aerococcaceae              | PowerSoil.HMP vs QIAStool+BB |
| 408.703374 | -2.0259403 | 0.64952423 | -3.1191143 | 0.00181396 | 0.01192028 | Lactobacillaceae           | PowerSoil.HMP vs QIAStool+BB |
| 810.892629 | -1.9297672 | 0.62539388 | -3.0856829 | 0.00203085 | 0.01200049 | Erysipelotrichaceae        | FastDNA vs MagNAPure         |
| 62.3051996 | 1.8473546  | 0.62901353 | 2.93690754 | 0.00331503 | 0.01326012 | Enterobacteriaceae         | FastDNA vs InnuPURE          |
| 29.6083625 | 1.83023832 | 0.58732018 | 3.11625309 | 0.00183165 | 0.01332109 | [Mogibacteriaceae]         | EasyDNA vs FastDNA           |
| 7308.6798  | -0.8282503 | 0.26169677 | -3.1649236 | 0.00155124 | 0.01344405 | Prevotellaceae             | PowerSoil.HMP vs MagNAPure   |
| 810.892629 | -1.5061467 | 0.51416507 | -2.9293057 | 0.0033972  | 0.01490319 | Erysipelotrichaceae        | EasyDNA vs QIAStool          |
| 75.3501469 | -2.1087165 | 0.72280839 | -2.9173935 | 0.0035297  | 0.01490319 | Mycoplasmataceae           | EasyDNA vs QIAStool          |
| 20.723165  | 4.16353174 | 1.34986951 | 3.08439573 | 0.00203966 | 0.01515177 | Pseudomonadaceae           | PowerSoil.HMP vs MagNAPure   |
| 86.5992792 | -2.5986406 | 0.87070194 | -2.9845352 | 0.0028401  | 0.01523324 | Porphyromonadaceae         | InnuPURE vs PowerSoil.HMP    |
| 30.7423537 | -1.6327572 | 0.56577317 | -2.8858865 | 0.00390313 | 0.01561251 | Elusimicrobiaceae          | EasyDNA vs QIAStool          |
| 29.6083625 | 1.32991944 | 0.43726084 | 3.04147851 | 0.00235419 | 0.01626534 | [Mogibacteriaceae]         | EasyDNA vs PowerSoil.HMP     |
| 22.9687795 | 1.79757037 | 0.62321785 | 2.8843371  | 0.00392239 | 0.01638173 | Helicobacteraceae          | FastDNA vs QIAStool          |
| 62.3051996 | 2.29684119 | 0.73468911 | 3.12627637 | 0.00177035 | 0.01681833 | Enterobacteriaceae         | FastDNA vs QIAStool+BB       |
| 908.726526 | -1.1737315 | 0.4109824  | -2.8559168 | 0.00429128 | 0.0169267  | Veillonellaceae            | FastDNA vs QIAStool          |
| 22.9687795 | -1.8651642 | 0.54282237 | -3.4360489 | 0.00059026 | 0.01771725 | Helicobacteraceae          | QIAStool vs MagNAPure        |
| 5.3314072  | -3.6505736 | 1.06984005 | -3.4122611 | 0.00064426 | 0.01771725 | [Methanomassiliicoccaceae] | QIAStool vs MagNAPure        |
| 17.2832685 | -2.4187504 | 0.86002934 | -2.8124045 | 0.00491726 | 0.01837503 | Desulfovibrionaceae        | FastDNA vs QIAStool          |
| 1.66132016 | 4.416643   | 1.57030905 | 2.81259475 | 0.00491435 | 0.01867455 | Leuconostocaceae           | EasyDNA vs QIAStool          |
| 4.00044772 | 5.29050645 | 1.80899893 | 2.92454925 | 0.00344955 | 0.01868509 | Cytophagaceae              | FastDNA vs MagNAPure         |
| 5.8077209  | -2.1252395 | 0.74134296 | -2.8667427 | 0.0041472  | 0.01925486 | Dethiosulfovibrionaceae    | InnuPURE vs QIAStool         |
| 31.9177507 | -1.3581394 | 0.47904029 | -2.8351256 | 0.00458077 | 0.01984999 | Succinivibrionaceae        | InnuPURE vs QIAStool         |
| 9.6383629  | -1.5817218 | 0.5627087  | -2.810907  | 0.00494021 | 0.02006959 | Fibrobacteraceae           | InnuPURE vs QIAStool         |

|            |            |            |            |            |            |                            |                              |
|------------|------------|------------|------------|------------|------------|----------------------------|------------------------------|
| 1574.16355 | -1.0713078 | 0.36311938 | -2.9502908 | 0.00317475 | 0.02010675 | Lachnospiraceae            | EasyDNA vs PowerSoil.HMP     |
| 22.9687795 | -1.8202879 | 0.62049856 | -2.9335893 | 0.00335067 | 0.02066248 | Helicobacteraceae          | QIAStool vs QIAStool+BB      |
| 35.1041071 | -2.0646688 | 0.68555435 | -3.0116778 | 0.00259808 | 0.02115581 | Peptococcaceae             | FastDNA vs QIAStool+BB       |
| 1574.16355 | -1.1146482 | 0.39092455 | -2.8513128 | 0.00435391 | 0.02140673 | Lachnospiraceae            | InnuPURE vs PowerSoil.HMP    |
| 71.0660634 | -1.3942701 | 0.48029311 | -2.9029567 | 0.00369658 | 0.02161076 | Alcaligenaceae             | EasyDNA vs PowerSoil.HMP     |
| 31.9177507 | 2.50733503 | 0.858128   | 2.92186602 | 0.00347941 | 0.02319608 | Succinivibrionaceae        | EasyDNA vs FastDNA           |
| 31.9177507 | -2.4656281 | 0.87371635 | -2.8220006 | 0.00477251 | 0.02386254 | Succinivibrionaceae        | FastDNA vs MagNAPure         |
| 20.723165  | -4.4393022 | 1.50402412 | -2.9516164 | 0.00316115 | 0.02423551 | Pseudomonadaceae           | FastDNA vs PowerSoil.HMP     |
| 35.1041071 | 0.97662205 | 0.3461751  | 2.82117935 | 0.00478474 | 0.02483044 | Peptococcaceae             | EasyDNA vs QIAStool+BB       |
| 5.3314072  | -3.7073919 | 1.31972034 | -2.8092254 | 0.00496609 | 0.02483044 | [Methanomassiliicoccaceae] | EasyDNA vs QIAStool+BB       |
| 88.4317884 | 1.46816717 | 0.5184466  | 2.83185802 | 0.00462784 | 0.02512256 | Coriobacteriaceae          | EasyDNA vs PowerSoil.HMP     |
| 35.1041071 | 0.85486803 | 0.29757508 | 2.87278099 | 0.00406876 | 0.02563319 | Peptococcaceae             | EasyDNA vs InnuPURE          |
| 35.1041071 | 1.08141422 | 0.39086961 | 2.76668788 | 0.00566289 | 0.02570083 | Peptococcaceae             | InnuPURE vs PowerSoil.HMP    |
| 23.2927606 | -5.16892   | 1.89209931 | -2.7318439 | 0.0062981  | 0.02654198 | Aerococcaceae              | InnuPURE vs PowerSoil.HMP    |
| 30.7423537 | -1.9203408 | 0.72425206 | -2.6514814 | 0.00801395 | 0.02844954 | Elusimicrobiaceae          | FastDNA vs QIAStool          |
| 1329.00016 | -0.6591519 | 0.24790456 | -2.6588937 | 0.00783977 | 0.0294383  | Peptostreptococcaceae      | InnuPURE vs QIAStool         |
| 7308.6798  | -0.6240217 | 0.23586236 | -2.6457027 | 0.00815214 | 0.0294383  | Prevotellaceae             | InnuPURE vs QIAStool         |
| 7.94956632 | 2.35515765 | 0.88703846 | 2.65507951 | 0.00792897 | 0.02945047 | Christensenellaceae        | FastDNA vs InnuPURE          |
| 5.3314072  | -3.5952234 | 1.21352904 | -2.9626183 | 0.00305035 | 0.03019842 | [Methanomassiliicoccaceae] | EasyDNA vs MagNAPure         |
| 2576.15115 | -1.0787948 | 0.38112544 | -2.8305504 | 0.0046468  | 0.03020419 | [Paraprevotellaceae]       | PowerSoil.HMP vs MagNAPure   |
| 14966.648  | -1.2133493 | 0.43533275 | -2.7871767 | 0.00531695 | 0.03057245 | Clostridiaceae             | PowerSoil.HMP vs QIAStool+BB |
| 4.2789796  | -4.8902304 | 1.84214054 | -2.6546457 | 0.00793918 | 0.03122742 | Xanthomonadaceae           | InnuPURE vs PowerSoil.HMP    |
| 75.3501469 | 2.20086404 | 0.8067117  | 2.72819154 | 0.00636826 | 0.03184131 | Mycoplasmataceae           | InnuPURE vs MagNAPure        |
| 408.703374 | 1.26821609 | 0.4885714  | 2.59576407 | 0.00943808 | 0.03190972 | Lactobacillaceae           | FastDNA vs QIAStool          |
| 62.3051996 | 1.47645817 | 0.57256579 | 2.57866992 | 0.00991815 | 0.03200858 | Enterobacteriaceae         | FastDNA vs QIAStool          |
| 5.3314072  | -3.3157346 | 1.1972195  | -2.7695294 | 0.00561373 | 0.03215138 | [Methanomassiliicoccaceae] | EasyDNA vs InnuPURE          |
| 1019.42191 | -1.6633229 | 0.59035526 | -2.8174948 | 0.00483999 | 0.03448493 | Campylobacteraceae         | FastDNA vs QIAStool+BB       |
| 8.45632111 | 5.03537667 | 1.90368579 | 2.64506711 | 0.00816747 | 0.03539238 | Rikenellaceae              | PowerSoil.HMP vs QIAStool    |
| 2.95003546 | 4.7042716  | 1.82149714 | 2.58264012 | 0.00980475 | 0.03548387 | Actinomycetaceae           | EasyDNA vs QIAStool          |
| 1019.42191 | 1.26709688 | 0.45944542 | 2.75788338 | 0.00581769 | 0.0358012  | Campylobacteraceae         | EasyDNA vs FastDNA           |
| 1.25729577 | 3.9531204  | 1.56655913 | 2.52344155 | 0.01162124 | 0.03587426 | Methanobacteriaceae        | FastDNA vs QIAStool          |
| 9.6383629  | -1.9706676 | 0.68484384 | -2.8775431 | 0.00400785 | 0.03607067 | Fibrobacteraceae           | EasyDNA vs MagNAPure         |
| 7308.6798  | 0.63923894 | 0.23698127 | 2.69742385 | 0.00698783 | 0.03668609 | Prevotellaceae             | EasyDNA vs InnuPURE          |
| 7.44045113 | 2.10035711 | 0.79576123 | 2.6394313  | 0.00830453 | 0.03774784 | Anaeroplasmataceae         | EasyDNA vs QIAStool+BB       |
| 6226.33527 | 0.93024556 | 0.31721125 | 2.93257433 | 0.00336164 | 0.0381879  | Turicibacteraceae          | QIAStool vs MagNAPure        |
| 88.4317884 | -1.3038581 | 0.44554611 | -2.9264268 | 0.0034288  | 0.0381879  | Coriobacteriaceae          | QIAStool vs MagNAPure        |
| 32.5255849 | -3.9854437 | 1.38548882 | -2.8765614 | 0.00402034 | 0.0381879  | Staphylococcaceae          | QIAStool vs MagNAPure        |
| 254.614729 | 0.76254431 | 0.27049763 | 2.81904245 | 0.00481671 | 0.0381879  | S24-7                      | QIAStool vs MagNAPure        |
| 1574.16355 | -0.9682183 | 0.35443007 | -2.7317613 | 0.00629968 | 0.0381879  | Lachnospiraceae            | QIAStool vs MagNAPure        |
| 14.253878  | 2.0500995  | 0.75196855 | 2.72631018 | 0.00640468 | 0.0381879  | Pirellulaceae              | QIAStool vs MagNAPure        |
| 1019.42191 | 1.19581281 | 0.43898336 | 2.72405041 | 0.00644867 | 0.0381879  | Campylobacteraceae         | QIAStool vs MagNAPure        |
| 367.01539  | 1.41359659 | 0.52364085 | 2.69955368 | 0.00694326 | 0.0381879  | Spirochaetaceae            | QIAStool vs MagNAPure        |
| 88.4317884 | -1.499251  | 0.60509226 | -2.4777262 | 0.01322226 | 0.03911584 | Coriobacteriaceae          | FastDNA vs QIAStool          |
| 42.1528852 | -2.6816693 | 0.99400689 | -2.6978378 | 0.00697914 | 0.03972744 | Bifidobacteriaceae         | QIAStool vs QIAStool+BB      |
| 254.614729 | 0.77942167 | 0.29736518 | 2.62109257 | 0.00876485 | 0.04149089 | S24-7                      | EasyDNA vs InnuPURE          |
| 20.723165  | 3.34261958 | 1.28892921 | 2.59333062 | 0.00950513 | 0.04149089 | Pseudomonadaceae           | EasyDNA vs InnuPURE          |
| 5.22647741 | 4.53504399 | 1.75773924 | 2.58004366 | 0.00987878 | 0.04149089 | Sphingobacteriaceae        | EasyDNA vs InnuPURE          |
| 17.2832685 | 1.59191715 | 0.99881224 | 2.65402579 | 0.00795377 | 0.04204138 | Desulfovibrionaceae        | QIAStool vs QIAStool+BB      |
| 5.22647741 | 5.05202816 | 1.82265879 | 2.77179041 | 0.00557489 | 0.04331319 | Sphingobacteriaceae        | EasyDNA vs MagNAPure         |
| 13.1827693 | -2.4080017 | 0.87080204 | -2.7652688 | 0.00568759 | 0.04331319 | RF16                       | EasyDNA vs MagNAPure         |
| 4.16403335 | 4.73703395 | 1.82302293 | 2.59845001 | 0.00936457 | 0.04347835 | Carnobacteriaceae          | FastDNA vs MagNAPure         |
| 2.29903269 | -4.3063622 | 1.6450049  | -2.6178416 | 0.00884879 | 0.04483386 | Deferribacteraceae         | EasyDNA vs PowerSoil.HMP     |
| 4.16403335 | 4.24556219 | 1.70906431 | 2.48414419 | 0.01298632 | 0.04486184 | Carnobacteriaceae          | EasyDNA vs QIAStool          |
| 6226.33527 | -0.7266515 | 0.29467249 | -2.4659632 | 0.01366454 | 0.04515238 | Turicibacteraceae          | EasyDNA vs QIAStool          |
| 810.892629 | -1.5452431 | 0.62495608 | -2.4725627 | 0.01341482 | 0.0465047  | Erysipelotrichaceae        | FastDNA vs InnuPURE          |
| 13.1827693 | -2.0388951 | 0.78399797 | -2.6006383 | 0.00930505 | 0.04652525 | RF16                       | QIAStool vs MagNAPure        |
| 1019.42191 | 1.28455598 | 0.48482082 | 2.64954788 | 0.00805996 | 0.04656863 | Campylobacteraceae         | PowerSoil.HMP vs MagNAPure   |
| 2.05453403 | 3.06422851 | 1.22184327 | 2.50787363 | 0.01214601 | 0.04934316 | [Cericococcaceae]          | PowerSoil.HMP vs QIAStool    |
| 2.05453403 | -3.5994508 | 1.41189289 | -2.5493795 | 0.01079148 | 0.05096371 | [Cericococcaceae]          | EasyDNA vs PowerSoil.HMP     |
| 75.3501469 | -2.0844308 | 0.82480975 | -2.5271656 | 0.01149873 | 0.05096371 | Mycoplasmataceae           | EasyDNA vs PowerSoil.HMP     |
| 2576.15115 | 0.88393503 | 0.352154   | 2.51008088 | 0.01207035 | 0.05096371 | [Paraprevotellaceae]       | EasyDNA vs PowerSoil.HMP     |
| 8.45632111 | -4.7100683 | 1.89200483 | -2.4894589 | 0.01279377 | 0.05117508 | Rikenellaceae              | EasyDNA vs PowerSoil.HMP     |
| 1329.00016 | -0.708884  | 0.28201899 | -2.5136037 | 0.01195046 | 0.05213896 | Peptostreptococcaceae      | InnuPURE vs MagNAPure        |
| 17.2832685 | -1.5355685 | 0.61355598 | -2.5027357 | 0.01232375 | 0.05213896 | Desulfovibrionaceae        | InnuPURE vs MagNAPure        |
| 4.16403335 | 4.13609738 | 1.72422814 | 2.39881097 | 0.0164484  | 0.05345731 | Carnobacteriaceae          | FastDNA vs InnuPURE          |
| 7.44045113 | 2.72371757 | 0.77809085 | 3.50051356 | 0.00046436 | 0.05386606 | Anaeroplasmataceae         | InnuPURE vs QIAStool+BB      |
| 5.8077209  | -2.048274  | 0.83138022 | -2.463703  | 0.013751   | 0.05402178 | Dethiosulfovibrionaceae    | InnuPURE vs MagNAPure        |
| 15.4343002 | 1.75738715 | 0.67749264 | 2.59395756 | 0.00948782 | 0.05421611 | Corynebacteriaceae         | EasyDNA vs FastDNA           |
| 29.6083625 | -1.5032074 | 0.60411383 | -2.488285  | 0.01283608 | 0.05562303 | [Mogibacteriaceae]         | FastDNA vs MagNAPure         |
| 14.253878  | 2.21225682 | 0.86748571 | 2.55019397 | 0.0107663  | 0.05598476 | Pirellulaceae              | PowerSoil.HMP vs MagNAPure   |



|            |            |            |            |            |            |                            |                              |
|------------|------------|------------|------------|------------|------------|----------------------------|------------------------------|
| 810.892629 | -1.4020193 | 0.57490323 | -2.4387049 | 0.01474    | 0.05601199 | Erysipelotrichaceae        | EasyDNA vs PowerSoil.HMP     |
| 2.29903269 | -3.8386124 | 1.56814864 | -2.4478626 | 0.01437064 | 0.05658441 | Deferribacteraceae         | EasyDNA vs InnuPURE          |
| 908.726526 | -1.0058792 | 0.41567683 | -2.4198587 | 0.01552654 | 0.05753952 | Veillonellaceae            | EasyDNA vs InnuPURE          |
| 1019.42191 | -0.9445218 | 0.40055924 | -2.3580077 | 0.01837331 | 0.05818216 | Campylobacteraceae         | EasyDNA vs QIAStool          |
| 71.0660634 | -1.1820059 | 0.44790155 | -2.638986  | 0.00831544 | 0.05880205 | Alcaligenaceae             | EasyDNA vs MagNAPure         |
| 2.63481049 | 4.11471371 | 1.78335384 | 2.30728957 | 0.02103868 | 0.05943999 | Cryomorphaceae             | FastDNA vs QIAStool          |
| 14.253878  | -2.3206117 | 1.01141826 | -2.2944135 | 0.02176676 | 0.05943999 | Pirellulaceae              | FastDNA vs QIAStool          |
| 5.3314072  | -4.2593782 | 1.62243256 | -2.6253037 | 0.00865717 | 0.05973448 | [Methanomassiliococcaceae] | FastDNA vs PowerSoil.HMP     |
| 2576.15115 | 0.8484523  | 0.34193436 | 2.48133089 | 0.01308928 | 0.05999253 | [Paraprevotellaceae]       | QIAStool vs MagNAPure        |
| 576.775751 | -1.100544  | 0.43076515 | -2.5548584 | 0.0106231  | 0.06126359 | Streptococcaceae           | FastDNA vs PowerSoil.HMP     |
| 31.9177507 | -2.2924488 | 0.90657913 | -2.5286804 | 0.01144922 | 0.06126359 | Succinivibrionaceae        | FastDNA vs PowerSoil.HMP     |
| 15.8153467 | 3.36640237 | 1.3327887  | 2.52583353 | 0.01154242 | 0.06126359 | Moraxellaceae              | FastDNA vs PowerSoil.HMP     |
| 408.703374 | 1.21382263 | 0.49751615 | 2.4397653  | 0.01469681 | 0.0621788  | Lactobacillaceae           | QIAStool vs MagNAPure        |
| 8.45632111 | 4.57043088 | 1.84612969 | 2.47568246 | 0.01329818 | 0.06286412 | Rikenellaceae              | PowerSoil.HMP vs MagNAPure   |
| 15.8153467 | -2.986528  | 1.18870072 | -2.5124305 | 0.01199027 | 0.06394811 | Moraxellaceae              | EasyDNA vs FastDNA           |
| 7.44045113 | -2.4644294 | 0.82396759 | -2.99093   | 0.00278129 | 0.06452599 | Anaeroplasmataceae         | QIAStool+BB vs MagNAPure     |
| 254.614729 | 0.77621196 | 0.33732155 | 2.30110398 | 0.02138575 | 0.06541525 | S24-7                      | FastDNA vs InnuPURE          |
| 1.25729577 | 3.29462871 | 1.41071562 | 2.3354308  | 0.01952093 | 0.06678212 | Methanobacteriaceae        | InnuPURE vs QIAStool         |
| 30.2465249 | -3.1037748 | 1.32591991 | -2.3408463 | 0.01924008 | 0.06907747 | Verrucomicrobiaceae        | EasyDNA vs PowerSoil.HMP     |
| 1329.00016 | -0.7318973 | 0.31460229 | -2.3264208 | 0.01999611 | 0.06907747 | Peptostreptococcaceae      | EasyDNA vs PowerSoil.HMP     |
| 7.94956632 | 1.80438583 | 0.77397907 | 2.33131089 | 0.01973697 | 0.06907794 | Christensenellaceae        | EasyDNA vs InnuPURE          |
| 1574.16355 | -0.9102305 | 0.38780387 | -2.3471412 | 0.01891808 | 0.0693663  | Lachnospiraceae            | InnuPURE vs MagNAPure        |
| 30.2465249 | 2.8646008  | 1.26008035 | 2.27334773 | 0.02300523 | 0.06993591 | Verrucomicrobiaceae        | EasyDNA vs QIAStool          |
| 7308.6798  | -0.5854122 | 0.25988525 | -2.2525795 | 0.02428568 | 0.07015862 | Prevotellaceae             | FastDNA vs InnuPURE          |
| 8.45632111 | -4.399111  | 1.79521351 | -2.4504667 | 0.01426711 | 0.07031649 | Rikenellaceae              | FastDNA vs PowerSoil.HMP     |
| 8.45632111 | 4.29348299 | 1.74750758 | 2.45691809 | 0.01401346 | 0.07049952 | Rikenellaceae              | PowerSoil.HMP vs QIAStool+BB |
| 32.5255849 | 3.84761504 | 1.60906299 | 2.39121468 | 0.01769273 | 0.07049952 | Staphylococcaceae          | PowerSoil.HMP vs QIAStool+BB |
| 2516.24433 | 0.64083569 | 0.26815705 | 2.38977754 | 0.01685858 | 0.07049952 | Ruminococcaceae            | PowerSoil.HMP vs QIAStool+BB |
| 7308.6798  | -0.916953  | 0.31545518 | -2.9067617 | 0.00365191 | 0.07060364 | Prevotellaceae             | QIAStool+BB vs MagNAPure     |
| 1019.42191 | -1.0332649 | 0.45044532 | -2.2938743 | 0.02179772 | 0.07202725 | Campylobacteraceae         | EasyDNA vs PowerSoil.HMP     |
| 32.5255849 | -3.3654336 | 1.44833673 | -2.3236541 | 0.02014404 | 0.07428114 | Staphylococcaceae          | InnuPURE vs PowerSoil.HMP    |
| 5.22647741 | 4.41383425 | 1.81274855 | 2.434885   | 0.01489652 | 0.07448262 | Sphingobacteriaceae        | EasyDNA vs FastDNA           |
| 4.2789796  | 4.42090287 | 1.86386076 | 2.37190619 | 0.01769658 | 0.07448975 | Xanthomonadaceae           | PowerSoil.HMP vs MagNAPure   |
| 14966.648  | -0.8528435 | 0.36244882 | -2.3530039 | 0.01862244 | 0.07448975 | Clostridiaceae             | PowerSoil.HMP vs MagNAPure   |
| 42.1528852 | 2.1770014  | 0.86093835 | 2.52863796 | 0.01145061 | 0.07557401 | Bifidobacteriaceae         | EasyDNA vs MagNAPure         |
| 31.9177507 | -1.9115858 | 0.86810273 | -2.2020272 | 0.02766339 | 0.07571032 | Succinivibrionaceae        | FastDNA vs InnuPURE          |
| 71.0660634 | 1.18925034 | 0.49362875 | 2.40919991 | 0.01598754 | 0.07887186 | Alcaligenaceae             | QIAStool vs QIAStool+BB      |
| 32.5255849 | 3.0928854  | 1.44133799 | 2.14584325 | 0.03188549 | 0.08290226 | Staphylococcaceae          | FastDNA vs InnuPURE          |
| 254.614729 | -0.7523977 | 0.32981434 | -2.2812764 | 0.0225321  | 0.08369064 | S24-7                      | PowerSoil.HMP vs MagNAPure   |
| 408.703374 | 1.16600506 | 0.49279223 | 2.36611902 | 0.01797566 | 0.08459136 | Lactobacillaceae           | EasyDNA vs FastDNA           |
| 88.4317884 | -1.591849  | 0.67867494 | -2.345525  | 0.0190003  | 0.0874014  | Coriobacteriaceae          | FastDNA vs PowerSoil.HMP     |
| 367.01539  | -1.3611864 | 0.59325355 | -2.294443  | 0.02176507 | 0.08842059 | Spirochaetaceae            | FastDNA vs MagNAPure         |
| 88.4317884 | -1.211262  | 0.54246601 | -2.232881  | 0.0255568  | 0.08859689 | Coriobacteriaceae          | PowerSoil.HMP vs MagNAPure   |
| 17.2832685 | -1.4788953 | 0.66253337 | -2.2321824 | 0.02560291 | 0.08865293 | Desulfovibrionaceae        | InnuPURE vs PowerSoil.HMP    |
| 8.45632111 | -4.1252908 | 1.86593498 | -2.2108438 | 0.02704666 | 0.08865293 | Rikenellaceae              | InnuPURE vs PowerSoil.HMP    |
| 408.703374 | -1.5156269 | 0.63804615 | -2.375419  | 0.01752904 | 0.09122372 | Lactobacillaceae           | FastDNA vs QIAStool+BB       |
| 7.94956632 | 2.22772913 | 0.93886337 | 2.37279374 | 0.01765412 | 0.09122372 | Christensenellaceae        | FastDNA vs QIAStool+BB       |
| 86.5992792 | 2.35593043 | 1.00429657 | 2.34585133 | 0.01898368 | 0.09122372 | Porphyromonadaceae         | FastDNA vs QIAStool+BB       |
| 2.60378858 | 4.2092934  | 1.79779891 | 2.34135941 | 0.01921366 | 0.09122372 | Rhodocyclaceae             | FastDNA vs QIAStool+BB       |
| 2516.24433 | 0.61507077 | 0.26609194 | 2.31149716 | 0.02080541 | 0.09122372 | Ruminococcaceae            | FastDNA vs QIAStool+BB       |
| 2.29903269 | 3.13747594 | 1.40445963 | 2.23393815 | 0.02548714 | 0.09345117 | Deferribacteraceae         | PowerSoil.HMP vs QIAStool    |
| 4.16403335 | 4.04801207 | 1.8168604  | 2.22802592 | 0.02587879 | 0.09345117 | Carnobacteriaceae          | PowerSoil.HMP vs QIAStool    |
| 62.3051996 | -1.4507519 | 0.631896   | -2.2958713 | 0.02168324 | 0.09350897 | Enterobacteriaceae         | FastDNA vs PowerSoil.HMP     |
| 29.6083625 | -1.0028885 | 0.45984104 | -2.180946  | 0.02918741 | 0.09485908 | [Mogibacteriaceae]         | PowerSoil.HMP vs MagNAPure   |
| 7.94956632 | -1.8663171 | 0.86386794 | -2.1604194 | 0.03074022 | 0.09545646 | Christensenellaceae        | InnuPURE vs PowerSoil.HMP    |
| 14.253878  | -2.4827691 | 1.09644696 | -2.2643768 | 0.02355095 | 0.09558915 | Pirellulaceae              | FastDNA vs PowerSoil.HMP     |
| 5.3314072  | -3.2764048 | 1.58511548 | -2.0669818 | 0.03873587 | 0.09591739 | [Methanomassiliococcaceae] | FastDNA vs InnuPURE          |
| 35.1041071 | -0.9596602 | 0.42884473 | -2.2377801 | 0.0252354  | 0.0967357  | Peptococcaceae             | PowerSoil.HMP vs QIAStool+BB |
| 2.95003546 | 4.04538074 | 1.85721321 | 2.17819942 | 0.02939119 | 0.09745501 | Actinomycetaceae           | EasyDNA vs InnuPURE          |
| 5.22647741 | 3.87561089 | 1.79473927 | 2.15942836 | 0.03081695 | 0.09758701 | Sphingobacteriaceae        | EasyDNA vs PowerSoil.HMP     |
| 32.5255849 | 3.57506683 | 1.60327104 | 2.22985804 | 0.02575687 | 0.09766893 | Staphylococcaceae          | FastDNA vs QIAStool+BB       |
| 5.3314072  | -3.6680621 | 1.66483055 | -2.2032645 | 0.02757611 | 0.09766893 | [Methanomassiliococcaceae] | FastDNA vs QIAStool+BB       |
| 4.00044772 | 3.823021   | 1.74418415 | 2.19186775 | 0.02838906 | 0.09766893 | Cytophagaceae              | FastDNA vs QIAStool+BB       |
| 2.63481049 | 4.11626382 | 1.88669558 | 2.18173184 | 0.02912933 | 0.09766893 | Cryomorphaceae             | FastDNA vs QIAStool+BB       |
| 31.9177507 | 1.3344078  | 0.57886073 | 2.3052312  | 0.02115363 | 0.09783553 | Succinivibrionaceae        | QIAStool vs QIAStool+BB      |
| 2.95003546 | 4.1628328  | 1.90223045 | 2.18839563 | 0.0286408  | 0.09798167 | Actinomycetaceae           | PowerSoil.HMP vs QIAStool    |
| 30.2465249 | -3.1673216 | 1.41854368 | -2.2327981 | 0.02556226 | 0.09798868 | Verrucomicrobiaceae        | FastDNA vs PowerSoil.HMP     |
| 2576.15115 | -0.7722792 | 0.37881863 | -2.0386515 | 0.04148482 | 0.09805502 | [Paraprevotellaceae]       | FastDNA vs InnuPURE          |
| 20.723165  | -2.6807638 | 1.24693501 | -2.1498826 | 0.03156451 | 0.09811055 | Pseudomonadaceae           | InnuPURE vs QIAStool         |
| 7.94956632 | -1.557632  | 0.72508445 | -2.1482077 | 0.03169726 | 0.09811055 | Christensenellaceae        | InnuPURE vs QIAStool         |

|            |            |            |            |            |            |                            |                           |
|------------|------------|------------|------------|------------|------------|----------------------------|---------------------------|
| 7.46995934 | -1.5690896 | 0.72723812 | -2.1576009 | 0.03095888 | 0.09843754 | RFP12                      | InnuPURE vs MagNAPure     |
| 22.9687795 | 1.19410946 | 0.55614757 | 2.14710901 | 0.0317846  | 0.09843754 | Helicobacteraceae          | InnuPURE vs MagNAPure     |
| 9.6383629  | -1.384477  | 0.64643194 | -2.1417212 | 0.03221592 | 0.09843754 | Fibrobacteraceae           | InnuPURE vs MagNAPure     |
| 9.6383629  | -1.8427971 | 0.80591343 | -2.2865943 | 0.02221951 | 0.09875339 | Fibrobacteraceae           | EasyDNA vs FastDNA        |
| 5.3314072  | -3.5558936 | 1.59551674 | -2.2286783 | 0.02583532 | 0.09878209 | [Methanomassiliicoccaceae] | FastDNA vs MagNAPure      |
| 1574.16355 | -0.86689   | 0.35975205 | -2.4096875 | 0.01596619 | 0.0987908  | Lachnospiraceae            | EasyDNA vs MagNAPure      |
| 7308.6798  | 0.55606923 | 0.26154925 | 2.12605939 | 0.03349831 | 0.09882003 | Prevotellaceae             | InnuPURE vs PowerSoil.HMP |
| 30.2465249 | 3.46560811 | 1.53285987 | 2.26087732 | 0.02376685 | 0.09902856 | Verrucomicrobiaceae        | EasyDNA vs QIAstool+BB    |
| 14966.648  | 0.71562954 | 0.32014118 | 2.23535608 | 0.02539398 | 0.09976207 | Clostridiaceae             | QIAstool vs MagNAPure     |
| 75.3501469 | -1.6556432 | 0.80348783 | -2.0605704 | 0.03934405 | 0.09978224 | Mycoplasmataceae           | FastDNA vs QIAstool       |
| 30.2465249 | 2.801054   | 1.35940485 | 2.06050023 | 0.03935074 | 0.09978224 | Verrucomicrobiaceae        | FastDNA vs QIAstool       |
| 8.41300461 | 2.92327159 | 1.38042248 | 2.11766444 | 0.0342035  | 0.09997945 | Neisseriaceae              | EasyDNA vs QIAstool       |

**Table S2C. Differential abundance of families - Hospital sewage microbial community**

| baseMean   | log2FoldCha | lfcSE      | stat       | pvalue    | padj      | family                | compare                    |
|------------|-------------|------------|------------|-----------|-----------|-----------------------|----------------------------|
| 649.223144 | 6.82534658  | 0.30988145 | 22.0256701 | 1.63E-107 | 3.12E-105 | Bifidobacteriaceae    | EasyDNA vs QIAStool        |
| 649.223144 | 5.53968468  | 0.33942717 | 16.3206873 | 7.03E-60  | 1.15E-57  | Bifidobacteriaceae    | EasyDNA vs PowerSoil.HMP   |
| 858.112951 | 4.52279196  | 0.28850532 | 15.6766329 | 2.19E-55  | 3.13E-53  | Legionellaceae        | EasyDNA vs FastDNA         |
| 649.223144 | 4.65718093  | 0.31803068 | 14.6438102 | 1.48E-48  | 1.99E-46  | Bifidobacteriaceae    | EasyDNA vs MagNAPure       |
| 283.625111 | 6.76475532  | 0.54891922 | 12.323772  | 6.75E-35  | 6.44E-33  | Lactobacillaceae      | EasyDNA vs QIAStool        |
| 649.223144 | 4.37138738  | 0.3572889  | 12.2348815 | 2.02E-34  | 3.06E-32  | Bifidobacteriaceae    | EasyDNA vs QIAStool+BB     |
| 458.885072 | 4.53073551  | 0.37259059 | 12.1600912 | 5.07E-34  | 3.23E-32  | Carnobacteriaceae     | EasyDNA vs QIAStool        |
| 649.223144 | 3.79123624  | 0.31179797 | 12.1592717 | 5.12E-34  | 3.66E-32  | Bifidobacteriaceae    | EasyDNA vs FastDNA         |
| 858.112951 | 3.26216457  | 0.29164006 | 11.1855845 | 4.80E-29  | 3.91E-27  | Legionellaceae        | EasyDNA vs PowerSoil.HMP   |
| 283.625111 | 6.53180922  | 0.59946607 | 10.8960449 | 1.20E-27  | 8.13E-26  | Lactobacillaceae      | EasyDNA vs MagNAPure       |
| 858.112951 | 3.3518407   | 0.31881432 | 10.5134571 | 7.49E-26  | 5.65E-24  | Legionellaceae        | EasyDNA vs QIAStool+BB     |
| 858.112951 | -3.2399311  | 0.31273297 | -10.360056 | 3.77E-25  | 4.18E-23  | Legionellaceae        | FastDNA vs MagNAPure       |
| 505.493872 | 3.75708256  | 0.37090716 | 10.129442  | 4.09E-24  | 1.95E-22  | Erysipelotrichaceae   | EasyDNA vs QIAStool        |
| 3668.6678  | 4.98922885  | 0.49392154 | 10.1012579 | 5.45E-24  | 2.45E-22  | Lachnospiraceae       | EasyDNA vs MagNAPure       |
| 458.885072 | 4.14006653  | 0.40630321 | 10.1895985 | 2.21E-24  | 3.16E-22  | Carnobacteriaceae     | FastDNA vs QIAStool        |
| 649.223144 | 3.76051584  | 0.391297   | 9.6103875  | 7.23E-22  | 1.18E-19  | Bifidobacteriaceae    | EasyDNA vs InnuPURE        |
| 103.008126 | 3.0694526   | 0.32848091 | 9.43417169 | 3.94E-21  | 1.51E-19  | Enterococcaceae       | EasyDNA vs QIAStool        |
| 3668.6678  | 4.08945931  | 0.44648024 | 9.11453394 | 7.90E-20  | 2.52E-18  | Lachnospiraceae       | EasyDNA vs QIAStool        |
| 458.885072 | -3.9036097  | 0.42130142 | -9.2655984 | 1.94E-20  | 2.70E-18  | Carnobacteriaceae     | QIAStool vs QIAStool+BB    |
| 505.493872 | 3.74637486  | 0.41138597 | 9.10671522 | 8.49E-20  | 2.87E-18  | Erysipelotrichaceae   | EasyDNA vs MagNAPure       |
| 649.223144 | 3.03411034  | 0.3389894  | 8.9504579  | 3.54E-19  | 2.53E-17  | Bifidobacteriaceae    | FastDNA vs QIAStool        |
| 49.8040986 | 4.33239316  | 0.49224425 | 8.80130772 | 1.35E-18  | 3.69E-17  | Actinomycetaceae      | EasyDNA vs QIAStool        |
| 4234.46977 | 2.87073548  | 0.32448599 | 8.84702452 | 8.99E-19  | 4.28E-17  | Ruminococcaceae       | EasyDNA vs FastDNA         |
| 858.112951 | 2.1585116   | 0.25552818 | 8.44725466 | 2.98E-17  | 7.12E-16  | Legionellaceae        | EasyDNA vs QIAStool        |
| 283.625111 | 5.01823943  | 0.58931798 | 8.51533406 | 1.66E-17  | 9.03E-16  | Lactobacillaceae      | EasyDNA vs PowerSoil.HMP   |
| 2750.67146 | 3.61050489  | 0.43024624 | 8.39171743 | 4.79E-17  | 1.29E-15  | Bacteroidaceae        | EasyDNA vs MagNAPure       |
| 4234.46977 | 2.65205125  | 0.32465158 | 8.16891528 | 3.11E-16  | 7.00E-15  | Ruminococcaceae       | EasyDNA vs MagNAPure       |
| 458.885072 | 4.13915825  | 0.49523734 | 8.35792836 | 6.38E-17  | 8.87E-15  | Carnobacteriaceae     | InnuPURE vs QIAStool       |
| 858.112951 | -2.3642804  | 0.2878549  | -8.213445  | 2.15E-16  | 1.02E-14  | Legionellaceae        | FastDNA vs QIAStool        |
| 719.094782 | 2.76017849  | 0.34134669 | 8.08614399 | 6.16E-16  | 2.51E-14  | Streptococcaceae      | EasyDNA vs PowerSoil.HMP   |
| 719.094782 | 2.39430118  | 0.30288969 | 7.90486188 | 2.68E-15  | 5.69E-14  | Streptococcaceae      | EasyDNA vs QIAStool        |
| 103.008126 | 2.8436344   | 0.36066035 | 7.88452173 | 3.16E-15  | 6.09E-14  | Enterococcaceae       | EasyDNA vs MagNAPure       |
| 103.008126 | 3.01172614  | 0.38076559 | 7.90965945 | 2.58E-15  | 8.41E-14  | Enterococcaceae       | EasyDNA vs PowerSoil.HMP   |
| 505.493872 | 3.18511617  | 0.40804762 | 7.80574613 | 5.92E-15  | 1.71E-13  | Erysipelotrichaceae   | EasyDNA vs FastDNA         |
| 3668.6678  | 3.84726205  | 0.49296566 | 7.80432056 | 5.98E-15  | 1.71E-13  | Lachnospiraceae       | EasyDNA vs FastDNA         |
| 33.4444509 | 4.99601637  | 0.68201466 | 7.32537975 | 2.38E-13  | 4.55E-12  | Coriobacteriaceae     | EasyDNA vs QIAStool        |
| 118.339928 | -2.2031982  | 0.29992413 | -7.3458517 | 2.04E-13  | 7.31E-12  | [Chthoniobacteraceae] | FastDNA vs QIAStool        |
| 649.223144 | 3.06483074  | 0.41298549 | 7.42115838 | 1.16E-13  | 8.07E-12  | Bifidobacteriaceae    | InnuPURE vs QIAStool       |
| 49.8040986 | 3.68571012  | 0.5128394  | 7.18687007 | 6.63E-13  | 1.90E-11  | Actinomycetaceae      | FastDNA vs QIAStool        |
| 3668.6678  | 3.52725908  | 0.49371146 | 7.14437356 | 9.04E-13  | 2.15E-11  | Lachnospiraceae       | EasyDNA vs PowerSoil.HMP   |
| 505.493872 | 2.94927376  | 0.41296872 | 7.14163966 | 9.22E-13  | 2.15E-11  | Erysipelotrichaceae   | EasyDNA vs PowerSoil.HMP   |
| 186.231671 | -2.2374803  | 0.31528142 | -7.0967719 | 1.28E-12  | 8.88E-11  | Rhizobiaceae          | QIAStool vs QIAStool+BB    |
| 719.094782 | 2.55887653  | 0.36330665 | 7.04329673 | 1.88E-12  | 9.45E-11  | Streptococcaceae      | EasyDNA vs QIAStool+BB     |
| 858.112951 | 2.49333772  | 0.35533582 | 7.0168488  | 2.27E-12  | 1.85E-10  | Legionellaceae        | EasyDNA vs InnuPURE        |
| 3668.6678  | 3.35179711  | 0.49869049 | 6.72119718 | 1.80E-11  | 6.80E-10  | Lachnospiraceae       | EasyDNA vs QIAStool+BB     |
| 4234.46977 | 2.19156111  | 0.32972499 | 6.64663329 | 3.00E-11  | 9.06E-10  | Ruminococcaceae       | EasyDNA vs QIAStool+BB     |
| 993.963868 | -2.9717971  | 0.45776516 | -6.4919687 | 8.47E-11  | 1.47E-09  | Opiritaceae           | EasyDNA vs QIAStool        |
| 505.493872 | 3.34829908  | 0.50439697 | 6.63822198 | 3.17E-11  | 1.73E-09  | Erysipelotrichaceae   | EasyDNA vs InnuPURE        |
| 49.8040986 | 3.93076665  | 0.601821   | 6.53145479 | 6.51E-11  | 3.02E-09  | Actinomycetaceae      | InnuPURE vs QIAStool       |
| 4234.46977 | 1.84495753  | 0.29167984 | 6.32528303 | 2.53E-10  | 4.02E-09  | Ruminococcaceae       | EasyDNA vs QIAStool        |
| 649.223144 | -2.4539592  | 0.3810699  | -6.4396564 | 1.20E-10  | 5.55E-09  | Bifidobacteriaceae    | QIAStool vs QIAStool+BB    |
| 505.493872 | 2.75232367  | 0.43583608 | 6.31504315 | 2.70E-10  | 6.80E-09  | Erysipelotrichaceae   | EasyDNA vs QIAStool+BB     |
| 458.885072 | 2.49945084  | 0.40038248 | 6.24265787 | 4.30E-10  | 7.26E-09  | Carnobacteriaceae     | EasyDNA vs MagNAPure       |
| 458.885072 | 2.52065316  | 0.40591353 | 6.20982789 | 5.30E-10  | 1.02E-08  | Carnobacteriaceae     | EasyDNA vs PowerSoil.HMP   |
| 47.9856545 | -3.2556254  | 0.52513758 | -6.1995666 | 5.66E-10  | 1.02E-08  | Bacteriovoracaceae    | EasyDNA vs PowerSoil.HMP   |
| 49.8040986 | 3.25085928  | 0.52651405 | 6.17430685 | 6.65E-10  | 1.02E-08  | Actinomycetaceae      | EasyDNA vs PowerSoil.HMP   |
| 33.4444509 | 4.67402796  | 0.75777778 | 6.16807211 | 6.91E-10  | 1.02E-08  | Coriobacteriaceae     | EasyDNA vs PowerSoil.HMP   |
| 858.112951 | -1.9793037  | 0.31561673 | -6.2712254 | 3.58E-10  | 2.50E-08  | Legionellaceae        | PowerSoil.HMP vs MagNAPure |
| 622.632062 | -2.1934305  | 0.35305951 | -6.2126369 | 5.21E-10  | 2.50E-08  | Flavobacteriaceae     | PowerSoil.HMP vs MagNAPure |
| 283.625111 | 3.63327256  | 0.59610996 | 6.09497039 | 1.09E-09  | 2.61E-08  | Lactobacillaceae      | FastDNA vs QIAStool        |
| 141.200238 | -2.2467743  | 0.37457141 | -5.9982536 | 1.99E-09  | 2.71E-08  | Chitinophagaceae      | EasyDNA vs PowerSoil.HMP   |
| 649.223144 | -2.1681657  | 0.3447053  | -6.2899111 | 3.18E-10  | 6.58E-08  | Bifidobacteriaceae    | QIAStool vs MagNAPure      |
| 616.023371 | 2.17009588  | 0.37325392 | 5.8139935  | 6.10E-09  | 9.15E-08  | Veillonellaceae       | EasyDNA vs MagNAPure       |

|            |            |            |            |          |          |                       |                            |
|------------|------------|------------|------------|----------|----------|-----------------------|----------------------------|
| 103.008126 | 2.0301104  | 0.34927259 | 5.81239536 | 6.16E-09 | 1.26E-07 | Enterococcaceae       | FastDNA vs QIAStool        |
| 858.112951 | -2.0689798 | 0.34079652 | -6.0710121 | 1.27E-09 | 1.31E-07 | Legionellaceae        | QIAStool+BB vs MagNAPure   |
| 141.200238 | -2.3121306 | 0.39864712 | -5.7999431 | 6.63E-09 | 1.43E-07 | Chitinophagaceae      | EasyDNA vs QIAStool+BB     |
| 2750.67146 | 2.58911904 | 0.42988976 | 6.02275112 | 1.71E-09 | 1.77E-07 | Bacteroidaceae        | QIAStool vs MagNAPure      |
| 579.211848 | -1.7141861 | 0.29702596 | -5.771166  | 7.87E-09 | 1.88E-07 | Cryomorphaceae        | EasyDNA vs FastDNA         |
| 622.632062 | -1.8973044 | 0.31931391 | -5.9418158 | 2.82E-09 | 1.94E-07 | Flavobacteriaceae     | QIAStool vs MagNAPure      |
| 283.625111 | -3.671693  | 0.63002671 | -5.8278371 | 5.62E-09 | 1.95E-07 | Lactobacillaceae      | QIAStool vs QIAStool+BB    |
| 118.339928 | 1.81003807 | 0.31730854 | 5.70434721 | 1.17E-08 | 2.39E-07 | [Chthoniobacteraceae] | EasyDNA vs FastDNA         |
| 639.445335 | -1.9434602 | 0.3470908  | -5.5992847 | 2.15E-08 | 2.70E-07 | Marinilabiaceae       | EasyDNA vs PowerSoil.HMP   |
| 47.9856545 | -2.7589818 | 0.49172905 | -5.6107766 | 2.01E-08 | 2.96E-07 | Bacteriovoraceae      | EasyDNA vs QIAStool        |
| 50.9419349 | -3.1533338 | 0.56681969 | -5.5632045 | 2.65E-08 | 3.08E-07 | Desulfobulbaceae      | EasyDNA vs PowerSoil.HMP   |
| 4234.46977 | 1.80165225 | 0.3248057  | 5.54686163 | 2.91E-08 | 3.16E-07 | Ruminococcaceae       | EasyDNA vs PowerSoil.HMP   |
| 169.692077 | -2.5020001 | 0.43818754 | -5.7098842 | 1.13E-08 | 3.62E-07 | Pirellulaceae         | PowerSoil.HMP vs MagNAPure |
| 283.625111 | 3.13148276 | 0.56384853 | 5.55376592 | 2.80E-08 | 5.00E-07 | Lactobacillaceae      | EasyDNA vs FastDNA         |
| 639.445335 | -1.9819676 | 0.35653587 | -5.558957  | 2.71E-08 | 5.12E-07 | Marinilabiaceae       | EasyDNA vs QIAStool+BB     |
| 47.9856545 | -2.8371254 | 0.51608043 | -5.4974481 | 3.85E-08 | 6.12E-07 | Bacteriovoraceae      | EasyDNA vs FastDNA         |
| 186.231671 | -1.6588195 | 0.29104376 | -5.6995534 | 1.20E-08 | 6.22E-07 | Rhizobiaceae          | QIAStool vs MagNAPure      |
| 49.8040986 | 2.6607802  | 0.48751569 | 5.45783502 | 4.82E-08 | 6.51E-07 | Actinomycetaceae      | EasyDNA vs MagNAPure       |
| 141.200238 | -2.0144185 | 0.3687622  | -5.4626491 | 4.69E-08 | 6.71E-07 | Chitinophagaceae      | EasyDNA vs FastDNA         |
| 33.4444509 | 3.7400853  | 0.68725107 | 5.44209458 | 5.27E-08 | 6.85E-07 | Coriobacteriaceae     | EasyDNA vs FastDNA         |
| 4234.46977 | 2.2738468  | 0.40301486 | 5.64209171 | 1.68E-08 | 6.85E-07 | Ruminococcaceae       | EasyDNA vs InnuPURE        |
| 50.9419349 | -2.9788598 | 0.55810891 | -5.3374166 | 9.43E-08 | 1.12E-06 | Desulfobulbaceae      | EasyDNA vs FastDNA         |
| 224.417038 | -2.2900472 | 0.43302783 | -5.2884528 | 1.23E-07 | 1.26E-06 | Caulobacteraceae      | EasyDNA vs PowerSoil.HMP   |
| 579.211848 | -1.5784754 | 0.29952912 | -5.2698562 | 1.37E-07 | 1.31E-06 | Cryomorphaceae        | EasyDNA vs PowerSoil.HMP   |
| 60.913589  | 1.80194128 | 0.33612104 | 5.36098928 | 8.28E-08 | 1.48E-06 | SB-1                  | FastDNA vs QIAStool        |
| 50.9419349 | -3.4975916 | 0.64107451 | -5.455827  | 4.87E-08 | 1.59E-06 | Desulfobulbaceae      | EasyDNA vs InnuPURE        |
| 264.350163 | 1.67550628 | 0.29505857 | 5.67855486 | 1.36E-08 | 1.73E-06 | Leptotrichiaceae      | PowerSoil.HMP vs QIAStool  |
| 24.9235631 | -2.9250852 | 0.56407379 | -5.1856428 | 2.15E-07 | 1.95E-06 | [Bryobacteraceae]     | EasyDNA vs PowerSoil.HMP   |
| 2750.67146 | 2.31054863 | 0.43619881 | 5.29700806 | 1.18E-07 | 1.98E-06 | Bacteroidaceae        | EasyDNA vs QIAStool+BB     |
| 50.9419349 | -2.9345835 | 0.56106287 | -5.2304005 | 1.69E-07 | 2.08E-06 | Desulfobulbaceae      | EasyDNA vs MagNAPure       |
| 2750.67146 | 2.23082024 | 0.42928279 | 5.1966217  | 2.03E-07 | 2.23E-06 | Bacteroidaceae        | EasyDNA vs FastDNA         |
| 164.684355 | 2.43591952 | 0.46885051 | 5.19551427 | 2.04E-07 | 2.30E-06 | Clostridiaceae        | EasyDNA vs MagNAPure       |
| 616.023371 | 1.91438373 | 0.37167225 | 5.15073087 | 2.59E-07 | 2.65E-06 | Veillonellaceae       | EasyDNA vs FastDNA         |
| 579.211848 | -1.5289396 | 0.29774329 | -5.1350935 | 2.82E-07 | 2.93E-06 | Cryomorphaceae        | EasyDNA vs MagNAPure       |
| 264.350163 | -1.5725743 | 0.29211855 | -5.3833429 | 7.31E-08 | 3.03E-06 | Leptotrichiaceae      | QIAStool vs MagNAPure      |
| 47.9856545 | -2.8959851 | 0.56014488 | -5.1700644 | 2.34E-07 | 3.48E-06 | Bacteriovoraceae      | EasyDNA vs QIAStool+BB     |
| 283.625111 | 3.09306229 | 0.60001044 | 5.15501411 | 2.54E-07 | 3.48E-06 | Lactobacillaceae      | EasyDNA vs QIAStool+BB     |
| 104.663517 | 2.01013043 | 0.39723097 | 5.06035681 | 4.18E-07 | 4.04E-06 | Rikenellaceae         | EasyDNA vs MagNAPure       |
| 719.094782 | 2.18960446 | 0.41686817 | 5.2525105  | 1.50E-07 | 4.08E-06 | Streptococcaceae      | QIAStool vs InnuPURE       |
| 49.8040986 | -2.9975018 | 0.57075775 | -5.2517935 | 1.51E-07 | 4.19E-06 | Actinomycetaceae      | QIAStool vs QIAStool+BB    |
| 28.0267224 | 3.26712548 | 0.65449599 | 4.99181896 | 5.98E-07 | 5.38E-06 | Succinivibrionaceae   | EasyDNA vs MagNAPure       |
| 3668.6678  | 3.086453   | 0.5976439  | 5.16436792 | 2.41E-07 | 5.62E-06 | Lachnospiraceae       | EasyDNA vs InnuPURE        |
| 22.1599751 | 3.76303745 | 0.74421723 | 5.05636971 | 4.27E-07 | 5.83E-06 | Sanguibacteraceae     | EasyDNA vs QIAStool        |
| 283.625111 | 3.40032645 | 0.64218587 | 5.29492571 | 1.19E-07 | 6.61E-06 | Lactobacillaceae      | FastDNA vs MagNAPure       |
| 186.231671 | 1.46311188 | 0.28954379 | 5.05316272 | 4.35E-07 | 6.90E-06 | Rhizobiaceae          | FastDNA vs QIAStool        |
| 131.739477 | -1.6538134 | 0.33613801 | -4.9200427 | 8.65E-07 | 7.30E-06 | Hyphomicrobiaceae     | EasyDNA vs MagNAPure       |
| 719.094782 | 1.64683881 | 0.33485216 | 4.91810712 | 8.74E-07 | 8.33E-06 | Streptococcaceae      | EasyDNA vs FastDNA         |
| 639.445335 | -1.6956173 | 0.34566547 | -4.9053709 | 9.33E-07 | 8.33E-06 | Marinilabiaceae       | EasyDNA vs FastDNA         |
| 7.94601326 | 4.25743862 | 0.86954011 | 4.8961958  | 9.77E-07 | 1.24E-05 | Micrococcaceae        | EasyDNA vs QIAStool        |
| 354.810526 | -1.2016891 | 0.25020884 | -4.8027444 | 1.57E-06 | 1.25E-05 | Pseudomonadaceae      | EasyDNA vs FastDNA         |
| 20.5932418 | 3.40730412 | 0.70969866 | 4.80105753 | 1.58E-06 | 1.25E-05 | [Mogibacteriaceae]    | EasyDNA vs FastDNA         |
| 47.9856545 | -2.9519041 | 0.59210402 | -4.9854486 | 6.18E-07 | 1.26E-05 | Bacteriovoraceae      | EasyDNA vs InnuPURE        |
| 33.4444509 | 3.30560527 | 0.69235087 | 4.77446541 | 1.80E-06 | 1.43E-05 | Coriobacteriaceae     | EasyDNA vs MagNAPure       |
| 31.145957  | 4.67590454 | 0.90414752 | 5.17161683 | 2.32E-07 | 1.47E-05 | Aerococcaceae         | PowerSoil.HMP vs QIAStool  |
| 1110.97909 | -0.8552071 | 0.17647177 | -4.8461411 | 1.26E-06 | 1.50E-05 | Verrucomicrobiaceae   | EasyDNA vs QIAStool        |
| 33.4444509 | 3.74329586 | 0.7734292  | 4.83986884 | 1.30E-06 | 1.63E-05 | Coriobacteriaceae     | EasyDNA vs QIAStool+BB     |
| 283.625111 | 3.43874693 | 0.67321308 | 5.10796215 | 3.26E-07 | 1.68E-05 | Lactobacillaceae      | QIAStool+BB vs MagNAPure   |
| 616.023371 | 2.26022292 | 0.4609869  | 4.90300899 | 9.44E-07 | 1.71E-05 | Veillonellaceae       | EasyDNA vs InnuPURE        |
| 92.6279814 | 2.25174145 | 0.47401585 | 4.75035053 | 2.03E-06 | 1.74E-05 | Oxalobacteraceae      | EasyDNA vs PowerSoil.HMP   |
| 858.112951 | -2.0294542 | 0.37889716 | -5.356214  | 8.50E-08 | 1.76E-05 | Legionellaceae        | FastDNA vs InnuPURE        |
| 44.0121162 | -2.6519931 | 0.53414421 | -4.9649384 | 6.87E-07 | 1.84E-05 | Microbacteriaceae     | QIAStool vs MagNAPure      |
| 458.885072 | -2.0312847 | 0.410162   | -4.9523961 | 7.33E-07 | 1.84E-05 | Carnobacteriaceae     | QIAStool vs MagNAPure      |
| 28.0267224 | 3.13232418 | 0.63285923 | 4.9494801  | 7.44E-07 | 1.84E-05 | Succinivibrionaceae   | QIAStool vs MagNAPure      |
| 104.663517 | 1.89306701 | 0.38356181 | 4.93549398 | 7.99E-07 | 1.84E-05 | Rikenellaceae         | QIAStool vs MagNAPure      |
| 283.625111 | 3.52238694 | 0.70298392 | 5.01062233 | 5.43E-07 | 1.89E-05 | Lactobacillaceae      | InnuPURE vs QIAStool       |

|            |            |            |            |          |            |                      |                            |
|------------|------------|------------|------------|----------|------------|----------------------|----------------------------|
| 993.963868 | 2.43312399 | 0.49693261 | 4.89628565 | 9.77E-07 | 2.02E-05   | Opiritaceae          | QIAStool vs MagNAPure      |
| 224.417038 | -2.0089553 | 0.43129404 | -4.6579715 | 3.19E-06 | 2.40E-05   | Caulobacteraceae     | EasyDNA vs MagNAPure       |
| 2750.67146 | 2.5329193  | 0.52617828 | 4.81380436 | 1.48E-06 | 2.41E-05   | Bacteroidaceae       | EasyDNA vs InnuPURE        |
| 283.625111 | 3.24236838 | 0.67710254 | 4.78859282 | 1.68E-06 | 2.49E-05   | Lactobacillaceae     | EasyDNA vs InnuPURE        |
| 579.211848 | -1.7395483 | 0.3646933  | -4.7698939 | 1.84E-06 | 2.50E-05   | Cryomorpaceae        | EasyDNA vs InnuPURE        |
| 616.023371 | 1.78559065 | 0.37061859 | 4.81786587 | 1.45E-06 | 2.73E-05   | Veillonellaceae      | QIAStool vs MagNAPure      |
| 127.559639 | -1.7610135 | 0.38087354 | -4.6236173 | 3.77E-06 | 3.07E-05   | Bradyrhizobiaceae    | EasyDNA vs PowerSoil.HMP   |
| 354.810526 | -1.1755292 | 0.25502204 | -4.6095201 | 4.04E-06 | 3.13E-05   | Pseudomonadaceae     | EasyDNA vs PowerSoil.HMP   |
| 1110.97909 | 1.00356055 | 0.20789468 | 4.82725467 | 1.38E-06 | 3.21E-05   | Verrucomicrobiaceae  | QIAStool vs QIAStool+BB    |
| 458.885072 | 2.12998418 | 0.43685713 | 4.8756997  | 1.08E-06 | 3.63E-05   | Carnobacteriaceae    | FastDNA vs PowerSoil.HMP   |
| 103.008126 | 1.94289127 | 0.39867209 | 4.87340682 | 1.10E-06 | 3.63E-05   | Enterococcaceae      | FastDNA vs PowerSoil.HMP   |
| 649.223144 | 1.74844843 | 0.36606848 | 4.77628779 | 1.79E-06 | 3.63E-05   | Bifidobacteriaceae   | FastDNA vs PowerSoil.HMP   |
| 49.8040986 | 2.60417624 | 0.54562554 | 4.77282692 | 1.82E-06 | 3.63E-05   | Actinomycetaceae     | FastDNA vs PowerSoil.HMP   |
| 4830.98886 | 1.39637929 | 0.30634779 | 4.55815037 | 5.16E-06 | 3.82E-05   | Moraxellaceae        | EasyDNA vs PowerSoil.HMP   |
| 458.885072 | 2.10878186 | 0.43175866 | 4.8841681  | 1.04E-06 | 3.84E-05   | Carnobacteriaceae    | FastDNA vs MagNAPure       |
| 186.231671 | 1.44657273 | 0.29780928 | 4.8573796  | 1.19E-06 | 4.18E-05   | Rhizobiaceae         | PowerSoil.HMP vs QIAStool  |
| 458.885072 | 2.01008235 | 0.41555158 | 4.83714281 | 1.32E-06 | 4.18E-05   | Carnobacteriaceae    | PowerSoil.HMP vs QIAStool  |
| 127.559639 | 1.70915508 | 0.35669596 | 4.79163005 | 1.65E-06 | 4.20E-05   | Bradyrhizobiaceae    | PowerSoil.HMP vs QIAStool  |
| 858.112951 | 1.28286089 | 0.28337494 | 4.5270795  | 5.98E-06 | 4.25E-05   | Legionellaceae       | EasyDNA vs MagNAPure       |
| 113.494552 | 1.61419048 | 0.36198295 | 4.45929977 | 8.22E-06 | 5.55E-05   | Alcaligenaceae       | EasyDNA vs MagNAPure       |
| 2750.67146 | 1.91527189 | 0.42988963 | 4.45526421 | 8.38E-06 | 5.94E-05   | Bacteroidaceae       | EasyDNA vs PowerSoil.HMP   |
| 103.008126 | 1.77479953 | 0.37958812 | 4.67559296 | 2.93E-06 | 6.60E-05   | Enterococcaceae      | FastDNA vs MagNAPure       |
| 21.4381793 | 4.3110629  | 0.92258237 | 4.67282169 | 2.97E-06 | 6.60E-05   | Turicibacteraceae    | FastDNA vs MagNAPure       |
| 186.231671 | -1.4894853 | 0.32863304 | -4.5323662 | 5.83E-06 | 6.77E-05   | Rhizobiaceae         | EasyDNA vs QIAStool+BB     |
| 719.094782 | 1.45997524 | 0.33529292 | 4.35432771 | 1.33E-05 | 8.58E-05   | Streptococcaceae     | EasyDNA vs MagNAPure       |
| 24.9235631 | -2.4240291 | 0.5584747  | -4.3404456 | 1.42E-05 | 8.73E-05   | [Bryobacteraceae]    | EasyDNA vs MagNAPure       |
| 141.200238 | -1.9858992 | 0.44217029 | -4.4912543 | 7.08E-06 | 8.88E-05   | Chitinophagaceae     | EasyDNA vs InnuPURE        |
| 60.913589  | -1.5556429 | 0.34130474 | -4.5579295 | 5.17E-06 | 8.91E-05   | SB-1                 | QIAStool vs MagNAPure      |
| 21.4381793 | 3.83550551 | 0.84989348 | 4.51292495 | 6.39E-06 | 9.14E-05   | Turicibacteraceae    | FastDNA vs QIAStool        |
| 47.9856545 | -2.257859  | 0.52469926 | -4.3031488 | 1.68E-05 | 9.88E-05   | Bacteriovoraceae     | EasyDNA vs MagNAPure       |
| 129.664767 | -1.7354308 | 0.40486896 | -4.2864011 | 1.82E-05 | 0.00010214 | Sphingomonadaceae    | EasyDNA vs MagNAPure       |
| 186.231671 | 1.65979847 | 0.36004846 | 4.60993081 | 4.03E-06 | 0.00010414 | Rhizobiaceae         | InnuPURE vs QIAStool       |
| 7.94601326 | 4.39122021 | 0.9573039  | 4.5870702  | 4.50E-06 | 0.00010414 | Micrococcaceae       | InnuPURE vs QIAStool       |
| 103.008126 | 1.74349936 | 0.39463833 | 4.41796766 | 9.96E-06 | 0.00010746 | Enterococcaceae      | EasyDNA vs QIAStool+BB     |
| 24.9235631 | -2.6423032 | 0.60049176 | -4.4002323 | 1.08E-05 | 0.00010886 | [Bryobacteraceae]    | EasyDNA vs QIAStool+BB     |
| 639.445335 | -1.4715753 | 0.34627638 | -4.2497132 | 2.14E-05 | 0.00011558 | Marinilabiaceae      | EasyDNA vs MagNAPure       |
| 59.9667273 | 1.93226679 | 0.42523105 | 4.54403979 | 5.52E-06 | 0.00011681 | Phyllobacteriaceae   | PowerSoil.HMP vs QIAStool  |
| 21.4381793 | 4.27081182 | 0.9437759  | 4.52523934 | 6.03E-06 | 0.00011979 | Turicibacteraceae    | InnuPURE vs QIAStool       |
| 622.632062 | -1.3757081 | 0.32541716 | -4.2275217 | 2.36E-05 | 0.00012268 | Flavobacteriaceae    | EasyDNA vs MagNAPure       |
| 79.5100271 | -1.7761899 | 0.42104528 | -4.2185246 | 2.46E-05 | 0.00012295 | Bdellovibrionaceae   | EasyDNA vs MagNAPure       |
| 616.023371 | 1.72314588 | 0.3956667  | 4.35504397 | 1.33E-05 | 0.00012556 | Veillonellaceae      | EasyDNA vs QIAStool+BB     |
| 269.467613 | 3.83469555 | 0.91517191 | 4.19013688 | 2.79E-05 | 0.00013441 | [Paraprevotellaceae] | EasyDNA vs MagNAPure       |
| 224.417038 | -1.9574683 | 0.45287758 | -4.3222901 | 1.54E-05 | 0.00013716 | Caulobacteraceae     | EasyDNA vs QIAStool+BB     |
| 622.632062 | 1.57003075 | 0.35300582 | 4.44760591 | 8.68E-06 | 0.00013893 | Flavobacteriaceae    | FastDNA vs PowerSoil.HMP   |
| 579.211848 | -1.3487004 | 0.31530459 | -4.2774525 | 1.89E-05 | 0.00015859 | Cryomorpaceae        | EasyDNA vs QIAStool+BB     |
| 17.3475351 | -3.0168408 | 0.68543834 | -4.4013307 | 1.08E-05 | 0.00017131 | Isosphaeraceae       | QIAStool vs MagNAPure      |
| 642.395629 | -1.4644737 | 0.33909709 | -4.3187444 | 1.57E-05 | 0.0001763  | Rhodocyclaceae       | EasyDNA vs QIAStool        |
| 21.4381793 | 4.36627385 | 0.95987712 | 4.54878417 | 5.40E-06 | 0.00018525 | Turicibacteraceae    | QIAStool+BB vs MagNAPure   |
| 736.495903 | -3.1494341 | 0.72564066 | -4.3402117 | 1.42E-05 | 0.00018979 | Enterobacteriaceae   | FastDNA vs PowerSoil.HMP   |
| 354.810526 | -0.9826337 | 0.22992472 | -4.273719  | 1.92E-05 | 0.00020399 | Pseudomonadaceae     | EasyDNA vs QIAStool        |
| 310.195483 | -1.5002553 | 0.3530494  | -4.2494202 | 2.14E-05 | 0.00021545 | Aeromonadaceae       | EasyDNA vs QIAStool        |
| 127.559639 | -1.5335396 | 0.37748821 | -4.0624835 | 4.86E-05 | 0.00022602 | Bradyrhizobiaceae    | EasyDNA vs MagNAPure       |
| 736.495903 | 3.2147007  | 0.72609436 | 4.42738697 | 9.54E-06 | 0.00022892 | Enterobacteriaceae   | PowerSoil.HMP vs MagNAPure |
| 21.4381793 | 3.65889131 | 0.90779156 | 4.03054124 | 5.56E-05 | 0.00025042 | Turicibacteraceae    | EasyDNA vs MagNAPure       |
| 22.1599751 | 3.8088383  | 0.87850368 | 4.33559743 | 1.45E-05 | 0.00025257 | Sanguibacteraceae    | InnuPURE vs QIAStool       |
| 28.7248963 | -2.4613767 | 0.5983952  | -4.1132963 | 3.90E-05 | 0.0002592  | Acetobacteraceae     | EasyDNA vs PowerSoil.HMP   |
| 20.5932418 | 3.06459248 | 0.74584242 | 4.10890073 | 3.98E-05 | 0.0002592  | [Mogibacteriaceae]   | EasyDNA vs PowerSoil.HMP   |
| 21.4381793 | -3.8907165 | 0.8934125  | -4.3548937 | 1.33E-05 | 0.00026436 | Turicibacteraceae    | QIAStool vs QIAStool+BB    |
| 20.5932418 | 2.73509037 | 0.65453561 | 4.17867316 | 2.93E-05 | 0.00028002 | [Mogibacteriaceae]   | EasyDNA vs QIAStool        |
| 169.692077 | -1.6566863 | 0.38767879 | -4.2733476 | 1.93E-05 | 0.00028471 | Pirellulaceae        | QIAStool vs MagNAPure      |
| 19.2945448 | -2.3378592 | 0.57446007 | -4.0696636 | 4.71E-05 | 0.00029516 | BA008                | EasyDNA vs PowerSoil.HMP   |
| 59.9667273 | -1.9028345 | 0.45384514 | -4.1926957 | 2.76E-05 | 0.00031504 | Phyllobacteriaceae   | FastDNA vs PowerSoil.HMP   |
| 24.9235631 | 2.00013401 | 0.46676422 | 4.28510563 | 1.83E-05 | 0.00033138 | [Bryobacteraceae]    | PowerSoil.HMP vs QIAStool  |
| 118.159531 | -1.6325049 | 0.41315264 | -3.9513361 | 7.77E-05 | 0.00033844 | Rhodobacteraceae     | EasyDNA vs MagNAPure       |
| 31.145957  | 4.0364622  | 0.94315101 | 4.27976235 | 1.87E-05 | 0.00035922 | Aerococcaceae        | PowerSoil.HMP vs MagNAPure |

|            |            |            |            |            |            |                       |                            |
|------------|------------|------------|------------|------------|------------|-----------------------|----------------------------|
| 127.559639 | -1.4816812 | 0.35306201 | -4.19666   | 2.71E-05   | 0.00036159 | Bradyrhizobiaceae     | QIAStool vs MagNAPure      |
| 118.339928 | 1.24831573 | 0.29795829 | 4.18956536 | 2.79E-05   | 0.00036159 | [Chthoniobacteraceae] | QIAStool vs MagNAPure      |
| 59.9667273 | -1.8333257 | 0.46049263 | -3.981227  | 6.86E-05   | 0.0004139  | Phyllobacteriaceae    | EasyDNA vs PowerSoil.HMP   |
| 639.445335 | 1.40828004 | 0.33538657 | 4.19897568 | 2.68E-05   | 0.00042565 | Marinilabiaceae       | PowerSoil.HMP vs QIAStool  |
| 79.5100271 | -1.6859989 | 0.41893896 | -4.0244501 | 5.71E-05   | 0.00042982 | Bdellovibrionaceae    | EasyDNA vs FastDNA         |
| 24.9235631 | -2.221681  | 0.55402879 | -4.0100462 | 6.07E-05   | 0.00043405 | [Bryobacteraceae]     | EasyDNA vs FastDNA         |
| 118.339928 | -1.589293  | 0.37966561 | -4.1860337 | 2.84E-05   | 0.00043842 | [Chthoniobacteraceae] | InnuPURE vs QIAStool       |
| 616.023371 | -1.5298785 | 0.3690248  | -4.1457335 | 3.39E-05   | 0.00044035 | Veillonellaceae       | FastDNA vs QIAStool        |
| 6.92597984 | -3.2118216 | 0.79077444 | -4.0616154 | 4.87E-05   | 0.00044325 | [Chromatiaceae]       | EasyDNA vs QIAStool        |
| 354.810526 | -1.2624747 | 0.30675563 | -4.1155713 | 3.86E-05   | 0.00044967 | Pseudomonadaceae      | EasyDNA vs InnuPURE        |
| 21.4381793 | 4.74636921 | 1.00321669 | 4.73115056 | 2.23E-06   | 0.00046213 | Turicibacteraceae     | InnuPURE vs MagNAPure      |
| 639.445335 | -1.4467874 | 0.34517174 | -4.1915002 | 2.77E-05   | 0.00048149 | Marinilabiaceae       | QIAStool vs QIAStool+BB    |
| 17.3475351 | -3.0488699 | 0.72528896 | -4.2036624 | 2.63E-05   | 0.00048587 | Isosphaeraceae        | FastDNA vs MagNAPure       |
| 91.6048239 | -1.2060837 | 0.30202592 | -3.9933119 | 6.52E-05   | 0.00053723 | Halomonadaceae        | EasyDNA vs QIAStool        |
| 50.9419349 | -2.1166588 | 0.53101195 | -3.986085  | 6.72E-05   | 0.00053723 | Desulfobulbaceae      | EasyDNA vs QIAStool        |
| 141.200238 | -1.3720459 | 0.34431013 | -3.9849128 | 6.75E-05   | 0.00053723 | Chitinophagaceae      | EasyDNA vs QIAStool        |
| 70.3986464 | 1.43164248 | 0.37367651 | 3.83123484 | 0.0001275  | 0.0005379  | Desulfovibrionaceae   | EasyDNA vs MagNAPure       |
| 103.008126 | 1.77265924 | 0.43241403 | 4.0994489  | 4.14E-05   | 0.00055112 | Enterococcaceae       | InnuPURE vs QIAStool       |
| 616.023371 | -1.8757177 | 0.45889686 | -4.0874494 | 4.36E-05   | 0.00055112 | Veillonellaceae       | InnuPURE vs QIAStool       |
| 11.2601759 | 3.51749155 | 0.88819118 | 3.9602865  | 7.49E-05   | 0.00057193 | Peptococcaceae        | EasyDNA vs QIAStool        |
| 310.195483 | -1.5679178 | 0.3821482  | -4.1029052 | 4.08E-05   | 0.00057573 | Aeromonadaceae        | PowerSoil.HMP vs QIAStool  |
| 50.9419349 | -2.4153589 | 0.61074665 | -3.9547641 | 7.66E-05   | 0.00060885 | Desulfobulbaceae      | EasyDNA vs QIAStool+BB     |
| 118.339928 | 1.41559349 | 0.34454956 | 4.10853378 | 3.98E-05   | 0.00061497 | [Chthoniobacteraceae] | QIAStool vs QIAStool+BB    |
| 182.91656  | -1.4289407 | 0.34903446 | -4.0939816 | 4.24E-05   | 0.00067844 | Planctomycetaceae     | PowerSoil.HMP vs MagNAPure |
| 458.885072 | 1.87232506 | 0.44582209 | 4.19971356 | 2.67E-05   | 0.00068818 | Carnobacteriaceae     | QIAStool+BB vs MagNAPure   |
| 593.953594 | -0.8557847 | 0.22798878 | -3.7536264 | 0.00017429 | 0.00071302 | Cytophagaceae         | EasyDNA vs MagNAPure       |
| 622.632062 | 1.27390462 | 0.3192542  | 3.99025176 | 6.60E-05   | 0.00073743 | Flavobacteriaceae     | FastDNA vs QIAStool        |
| 12.2684488 | -2.4781182 | 0.62161852 | -3.9865578 | 6.70E-05   | 0.00073743 | Synergistaceae        | FastDNA vs QIAStool        |
| 164.684355 | 1.63111762 | 0.42086767 | 3.87560684 | 0.00010636 | 0.00078133 | Clostridiaceae        | EasyDNA vs QIAStool        |
| 17.3475351 | -2.7235825 | 0.73173203 | -3.7221038 | 0.00019757 | 0.00078447 | Isosphaeraceae        | EasyDNA vs MagNAPure       |
| 12.0832988 | 2.86029733 | 0.72533982 | 3.94338935 | 8.03E-05   | 0.0008206  | Microthrixaceae       | FastDNA vs QIAStool        |
| 858.112951 | -1.2606274 | 0.32020896 | -3.9368897 | 8.25E-05   | 0.00082545 | Legionellaceae        | FastDNA vs PowerSoil.HMP   |
| 49.8040986 | 2.84923277 | 0.62918338 | 4.52846159 | 5.94E-06   | 0.00084963 | Actinomycetaceae      | InnuPURE vs PowerSoil.HMP  |
| 141.200238 | -1.3748839 | 0.3732346  | -3.6836989 | 0.00022987 | 0.00087939 | Chitinophagaceae      | EasyDNA vs MagNAPure       |
| 20.5932418 | 2.60659271 | 0.70858012 | 3.67861394 | 0.0002345  | 0.00087939 | [Mogibacteriaceae]    | EasyDNA vs MagNAPure       |
| 283.625111 | 3.28944084 | 0.74068442 | 4.44108277 | 8.95E-06   | 0.0009264  | Lactobacillaceae      | InnuPURE vs MagNAPure      |
| 21.4381793 | 3.18333391 | 0.83254469 | 3.82361927 | 0.00013151 | 0.00093029 | Turicibacteraceae     | EasyDNA vs QIAStool        |
| 129.664767 | -1.5315971 | 0.40361056 | -3.79474   | 0.0001478  | 0.00100644 | Sphingomonadaceae     | EasyDNA vs FastDNA         |
| 131.739477 | -1.2097072 | 0.30846328 | -3.921722  | 8.79E-05   | 0.00107054 | Hyphomicrobiaceae     | QIAStool vs MagNAPure      |
| 736.495903 | -2.5211072 | 0.67768495 | -3.7201758 | 0.00019908 | 0.00115895 | Enterobacteriaceae    | EasyDNA vs PowerSoil.HMP   |
| 105.619852 | -1.7219182 | 0.47856033 | -3.5981215 | 0.00032052 | 0.00116948 | Nitrosomonadaceae     | EasyDNA vs MagNAPure       |
| 118.159531 | -1.6800207 | 0.44427482 | -3.7814899 | 0.00015589 | 0.00117699 | Rhodobacteraceae      | EasyDNA vs QIAStool+BB     |
| 49.8040986 | 2.01409717 | 0.50832968 | 3.96218684 | 7.43E-05   | 0.00117765 | Actinomycetaceae      | FastDNA vs MagNAPure       |
| 616.023371 | 1.37539476 | 0.37422072 | 3.67535705 | 0.00023752 | 0.00133501 | Veillonellaceae       | EasyDNA vs PowerSoil.HMP   |
| 59.9667273 | -1.7905328 | 0.4630503  | -3.8668214 | 0.00011026 | 0.00153266 | Phyllobacteriaceae    | QIAStool vs QIAStool+BB    |
| 4421.89202 | 1.4148799  | 0.38994132 | 3.62844316 | 0.00028514 | 0.00154924 | Campylobacteraceae    | EasyDNA vs PowerSoil.HMP   |
| 7.76499835 | 3.00619582 | 0.78949885 | 3.80772665 | 0.00014025 | 0.00161288 | Victivallaceae        | QIAStool vs MagNAPure      |
| 858.112951 | -1.103653  | 0.29099694 | -3.7926618 | 0.00014904 | 0.00168722 | Legionellaceae        | PowerSoil.HMP vs QIAStool  |
| 118.339928 | -1.1641985 | 0.30830147 | -3.7761692 | 0.00015926 | 0.00168722 | [Chthoniobacteraceae] | PowerSoil.HMP vs QIAStool  |
| 224.417038 | 1.54686811 | 0.40966719 | 3.77591408 | 0.00015942 | 0.00168722 | Caulobacteraceae      | PowerSoil.HMP vs QIAStool  |
| 31.145957  | 3.18626251 | 0.86955576 | 3.66424172 | 0.00024807 | 0.00169221 | Aerococcaceae         | EasyDNA vs QIAStool        |
| 264.350163 | 1.08538354 | 0.29166878 | 3.72128808 | 0.00019821 | 0.00188959 | Leptotrichiaceae      | FastDNA vs QIAStool        |
| 91.6048239 | -1.1722866 | 0.3237836  | -3.6205868 | 0.00029394 | 0.00191058 | Halomonadaceae        | EasyDNA vs FastDNA         |
| 7.94601326 | 3.25719295 | 0.87981198 | 3.70214661 | 0.00021378 | 0.00191069 | Micrococcaceae        | FastDNA vs QIAStool        |
| 15.0781299 | 2.03353532 | 0.58767751 | 3.46029119 | 0.00053959 | 0.00191697 | [Odoribacteraceae]    | EasyDNA vs MagNAPure       |
| 38.1375375 | 1.96739339 | 0.52466333 | 3.74982069 | 0.00017696 | 0.00192794 | Procabacteriaceae     | QIAStool vs MagNAPure      |
| 12.0832988 | 2.60554261 | 0.71947574 | 3.62144612 | 0.00029296 | 0.0019295  | Microthrixaceae       | EasyDNA vs QIAStool        |
| 269.467613 | 3.28592868 | 0.91384685 | 3.59571046 | 0.00032351 | 0.00201137 | [Paraprevotellaceae]  | EasyDNA vs FastDNA         |
| 59.9667273 | -1.5618619 | 0.41967538 | -3.7215952 | 0.00019797 | 0.00204897 | Phyllobacteriaceae    | QIAStool vs MagNAPure      |
| 92.6279814 | 1.60546842 | 0.44860355 | 3.57881343 | 0.00034516 | 0.00205114 | Oxalobacteraceae      | EasyDNA vs FastDNA         |
| 60.913589  | -1.2906483 | 0.36164555 | -3.5688212 | 0.00035859 | 0.00205114 | SB-1                  | EasyDNA vs FastDNA         |
| 8.22875632 | -3.0323745 | 0.85554848 | -3.5443632 | 0.00039356 | 0.00206938 | Solibacteraceae       | EasyDNA vs PowerSoil.HMP   |
| 458.885072 | 2.1290759  | 0.52006231 | 4.09388616 | 4.24E-05   | 0.00207036 | Carnobacteriaceae     | InnuPURE vs PowerSoil.HMP  |
| 649.223144 | 1.77916883 | 0.43517387 | 4.08840914 | 4.34E-05   | 0.00207036 | Bifidobacteriaceae    | InnuPURE vs PowerSoil.HMP  |
| 118.159531 | -1.4258087 | 0.38539195 | -3.6996327 | 0.00021591 | 0.00212827 | Rhodobacteraceae      | QIAStool vs MagNAPure      |

|            |            |            |            |            |            |                       |                              |
|------------|------------|------------|------------|------------|------------|-----------------------|------------------------------|
| 3.24919787 | 3.6188219  | 1.00940315 | 3.58511056 | 0.00033694 | 0.00214516 | Leuconostocaceae      | EasyDNA vs QIAStool          |
| 33.4444509 | 2.98208837 | 0.80192515 | 3.71866173 | 0.00020028 | 0.00217639 | Coriobacteriaceae     | EasyDNA vs InnuPURE          |
| 1110.97909 | -0.706397  | 0.19141459 | -3.6904028 | 0.0002239  | 0.00218732 | Verrucomicrobiaceae   | PowerSoil.HMP vs QIAStool    |
| 858.112951 | 1.1933291  | 0.31822856 | 3.74991205 | 0.0001769  | 0.00223533 | Legionellaceae        | QIAStool vs QIAStool+BB      |
| 1181.58837 | 3.09655277 | 0.88052293 | 3.51672018 | 0.00043691 | 0.00240303 | Prevotellaceae        | EasyDNA vs FastDNA           |
| 28.7248963 | -2.008188  | 0.59242969 | -3.389749  | 0.00069957 | 0.00242158 | Acetobacteraceae      | EasyDNA vs MagNAPure         |
| 19.2945448 | -1.9141579 | 0.56688273 | -3.3766382 | 0.00073378 | 0.00246687 | BA008                 | EasyDNA vs MagNAPure         |
| 92.6279814 | 1.52494408 | 0.4523832  | 3.37091228 | 0.0007492  | 0.00246687 | Oxalobacteraceae      | EasyDNA vs MagNAPure         |
| 169.692077 | 2.05994287 | 0.51874697 | 3.97099742 | 7.16E-05   | 0.00255871 | Pirellulaceae         | InnuPURE vs PowerSoil.HMP    |
| 354.810526 | -0.98635   | 0.27628461 | -3.5700506 | 0.00035691 | 0.00256637 | Pseudomonadaceae      | EasyDNA vs QIAStool+BB       |
| 129.664767 | -1.3164872 | 0.3730486  | -3.5289965 | 0.00041714 | 0.00257011 | Sphingomonadaceae     | EasyDNA vs QIAStool          |
| 4.87640195 | 3.65458882 | 1.09184921 | 3.34715525 | 0.00081645 | 0.00262432 | Corynebacteriaceae    | EasyDNA vs MagNAPure         |
| 22.1599751 | -3.0574814 | 0.83143843 | -3.6773395 | 0.00023568 | 0.00272995 | Sanguibacteraceae     | QIAStool vs QIAStool+BB      |
| 44.0121162 | 2.3469519  | 0.63926998 | 3.67130004 | 0.00024132 | 0.00279529 | Microbacteriaceae     | InnuPURE vs QIAStool         |
| 2.31382502 | 3.84858947 | 1.07433352 | 3.5823042  | 0.00034058 | 0.00286485 | Nocardiaceae          | FastDNA vs QIAStool          |
| 458.885072 | 2.10787358 | 0.51588    | 4.08597657 | 4.39E-05   | 0.00302853 | Carnobacteriaceae     | InnuPURE vs MagNAPure        |
| 17.3475351 | -2.7947582 | 0.75672129 | -3.6932464 | 0.00022141 | 0.00303647 | Isosphaeraceae        | PowerSoil.HMP vs MagNAPure   |
| 47.3908296 | 1.37466258 | 0.40163928 | 3.42262981 | 0.00062018 | 0.00328468 | Christensenellaceae   | EasyDNA vs FastDNA           |
| 169.692077 | -1.7496979 | 0.46383396 | -3.7722504 | 0.00016178 | 0.0033327  | Pirellulaceae         | QIAStool+BB vs MagNAPure     |
| 113.494552 | 1.2476785  | 0.34930574 | 3.57188087 | 0.00035443 | 0.00333483 | Alcaligenaceae        | QIAStool vs MagNAPure        |
| 113.494552 | 1.20497493 | 0.35380394 | 3.40577026 | 0.00065978 | 0.00336957 | Alcaligenaceae        | EasyDNA vs FastDNA           |
| 12.2684488 | 2.29895523 | 0.64642084 | 3.55643735 | 0.00037592 | 0.00338326 | Synergistaceae        | QIAStool vs MagNAPure        |
| 28.7248963 | -1.9922099 | 0.56229317 | -3.5430093 | 0.00039559 | 0.00351634 | Acetobacteraceae      | FastDNA vs PowerSoil.HMP     |
| 2750.67146 | 1.695233   | 0.46819787 | 3.6207619  | 0.00029374 | 0.00352484 | Bacteroidaceae        | PowerSoil.HMP vs MagNAPure   |
| 118.159531 | -1.7715548 | 0.49520976 | -3.5773826 | 0.00034705 | 0.00353559 | Rhodobacteraceae      | EasyDNA vs InnuPURE          |
| 92.6279814 | -1.6411801 | 0.46414377 | -3.5359305 | 0.00040634 | 0.00354978 | Oxalobacteraceae      | PowerSoil.HMP vs QIAStool    |
| 649.223144 | 1.28566191 | 0.36445274 | 3.52765052 | 0.00041927 | 0.00354978 | Bifidobacteriaceae    | PowerSoil.HMP vs QIAStool    |
| 44.0121162 | -2.1137016 | 0.58933766 | -3.5865715 | 0.00033505 | 0.00357391 | Microbacteriaceae     | PowerSoil.HMP vs MagNAPure   |
| 354.810526 | -0.8207072 | 0.25232262 | -3.2526104 | 0.0011435  | 0.00359006 | Pseudomonadaceae      | EasyDNA vs MagNAPure         |
| 12.0832988 | -2.8162903 | 0.78971557 | -3.5662084 | 0.00036218 | 0.00387258 | Microthrixaceae       | QIAStool vs QIAStool+BB      |
| 169.692077 | 1.41344996 | 0.42000085 | 3.36535026 | 0.00076447 | 0.003894   | Pirellulaceae         | EasyDNA vs PowerSoil.HMP     |
| 1110.97909 | -0.8492203 | 0.23853992 | -3.5600764 | 0.00037075 | 0.00396414 | Verrucomicrobiaceae   | InnuPURE vs QIAStool         |
| 118.159531 | -1.5107086 | 0.41671211 | -3.6253053 | 0.00028862 | 0.00400461 | Rhodobacteraceae      | FastDNA vs MagNAPure         |
| 639.445335 | 1.16043718 | 0.33390826 | 3.47531735 | 0.00051025 | 0.00403097 | Marinilabiaceae       | FastDNA vs QIAStool          |
| 993.963868 | -1.7178466 | 0.49615794 | -3.4622979 | 0.00053558 | 0.00403097 | Opitutaceae           | FastDNA vs QIAStool          |
| 59.9667273 | -1.4629208 | 0.45541119 | -3.2123076 | 0.00131673 | 0.00403998 | Phyllobacteriaceae    | EasyDNA vs MagNAPure         |
| 7.4067071  | -2.8464888 | 0.85314609 | -3.3364612 | 0.00084852 | 0.00419119 | Desulfobacteraceae    | EasyDNA vs PowerSoil.HMP     |
| 719.094782 | -1.3002032 | 0.36982603 | -3.5157159 | 0.00043857 | 0.00421027 | Streptococcaceae      | PowerSoil.HMP vs MagNAPure   |
| 118.159531 | -1.4733244 | 0.41877181 | -3.5182035 | 0.00043448 | 0.00431376 | Rhodobacteraceae      | QIAStool vs QIAStool+BB      |
| 593.953594 | -0.7654102 | 0.23067053 | -3.3181968 | 0.00090601 | 0.0043435  | Cytophagaceae         | EasyDNA vs PowerSoil.HMP     |
| 59.9667273 | -1.6915917 | 0.49533902 | -3.4150181 | 0.00063778 | 0.00437747 | Phyllobacteriaceae    | EasyDNA vs QIAStool+BB       |
| 70.3986464 | 1.2061253  | 0.36301817 | 3.32249295 | 0.00089217 | 0.00439932 | Desulfovibrionaceae   | EasyDNA vs FastDNA           |
| 269.467613 | 3.16345108 | 0.93031323 | 3.40041501 | 0.00067284 | 0.00441732 | [Paraprevotellaceae]  | EasyDNA vs QIAStool+BB       |
| 1181.58837 | 2.792938   | 0.8806047  | 3.17161376 | 0.00151594 | 0.00454783 | Prevotellaceae        | EasyDNA vs MagNAPure         |
| 182.91656  | -1.3835089 | 0.37942483 | -3.6463319 | 0.00026601 | 0.00456651 | Planctomycetaceae     | QIAStool+BB vs MagNAPure     |
| 4421.89202 | 1.229723   | 0.38951484 | 3.15706329 | 0.00159367 | 0.00467707 | Campylobacteraceae    | EasyDNA vs MagNAPure         |
| 19.2945448 | -2.0575467 | 0.61259008 | -3.3587659 | 0.00078291 | 0.00476931 | BA008                 | EasyDNA vs QIAStool+BB       |
| 92.6279814 | 1.07051314 | 0.50813645 | 3.35640779 | 0.00078962 | 0.00476931 | Oxalobacteraceae      | EasyDNA vs QIAStool+BB       |
| 15.0781299 | 2.00704774 | 0.61163899 | 3.28142545 | 0.00103284 | 0.00481008 | [Odoribacteraceae]    | EasyDNA vs PowerSoil.HMP     |
| 254.528648 | -1.3406432 | 0.42677372 | -3.1413445 | 0.00168174 | 0.00483053 | Xanthomonadaceae      | EasyDNA vs MagNAPure         |
| 129.664767 | -1.4706229 | 0.44044394 | -3.3389559 | 0.00084094 | 0.00488391 | Sphingomonadaceae     | EasyDNA vs QIAStool+BB       |
| 60.913589  | 1.45888204 | 0.41924116 | 3.4798159  | 0.00050176 | 0.00498174 | SB-1                  | InnuPURE vs QIAStool         |
| 11.2601759 | 2.86575309 | 0.92393381 | 3.10168657 | 0.00192422 | 0.00541186 | Peptococcaceae        | EasyDNA vs MagNAPure         |
| 458.885072 | -1.8935274 | 0.45074517 | -4.2008822 | 2.66E-05   | 0.00550365 | Carnobacteriaceae     | PowerSoil.HMP vs QIAStool+BB |
| 736.495903 | -3.0921527 | 0.82941526 | -3.7281117 | 0.00019292 | 0.00551751 | Enterobacteriaceae    | InnuPURE vs PowerSoil.HMP    |
| 129.664767 | -1.3324584 | 0.41218724 | -3.2326533 | 0.00122646 | 0.00555315 | Sphingomonadaceae     | EasyDNA vs PowerSoil.HMP     |
| 118.159531 | -1.3509387 | 0.4195755  | -3.2197749 | 0.00128291 | 0.00565175 | Rhodobacteraceae      | EasyDNA vs PowerSoil.HMP     |
| 11.2601759 | 3.04335101 | 0.94850206 | 3.20858662 | 0.00133389 | 0.00572169 | Peptococcaceae        | EasyDNA vs PowerSoil.HMP     |
| 616.023371 | 1.33864065 | 0.39319285 | 3.40453967 | 0.00066276 | 0.00607517 | Veillonellaceae       | QIAStool vs QIAStool+BB      |
| 103.008126 | -1.3554459 | 0.40137289 | -3.377024  | 0.00073275 | 0.00607517 | Enterococcaceae       | QIAStool vs QIAStool+BB      |
| 24.9235631 | -1.717352  | 0.51140949 | -3.3580762 | 0.00078487 | 0.00607517 | [Bryobacteraceae]     | QIAStool vs QIAStool+BB      |
| 60.913589  | -1.3029449 | 0.38807828 | -3.3574279 | 0.00078671 | 0.00607517 | SB-1                  | QIAStool vs QIAStool+BB      |
| 22.5747955 | 1.6881564  | 0.55662937 | 3.0328195  | 0.0024228  | 0.00667507 | Peptostreptococcaceae | EasyDNA vs MagNAPure         |
| 7.4067071  | -2.6173944 | 0.80329827 | -3.2583096 | 0.00112078 | 0.00668966 | Desulfobacteraceae    | EasyDNA vs QIAStool          |
| 12.2684488 | 2.11983061 | 0.66428024 | 3.19116918 | 0.00141698 | 0.00675428 | Synergistaceae        | EasyDNA vs FastDNA           |

|            |            |            |            |            |            |                       |                            |
|------------|------------|------------|------------|------------|------------|-----------------------|----------------------------|
| 104.663517 | 1.42534693 | 0.4244879  | 3.35780346 | 0.00078564 | 0.00685653 | Rikenellaceae         | PowerSoil.HMP vs MagNAPure |
| 20.5932418 | 2.78844857 | 0.82723718 | 3.37079697 | 0.00074951 | 0.00718649 | [Mogibacteriaceae]    | EasyDNA vs InnuPURE        |
| 993.963868 | -2.017559  | 0.60189132 | -3.3520321 | 0.00080221 | 0.00743379 | Opitutaceae           | InnuPURE vs QIAstool       |
| 186.231671 | -0.9108244 | 0.30550845 | -2.9813394 | 0.0028699  | 0.00768192 | Rhizobiaceae          | EasyDNA vs MagNAPure       |
| 1110.97909 | -0.5821481 | 0.19548775 | -2.9779262 | 0.00290206 | 0.00768192 | Verrucomicrobiaceae   | EasyDNA vs MagNAPure       |
| 59.9667273 | -1.5324296 | 0.44867974 | -3.4154197 | 0.00063684 | 0.00785434 | Phyllobacteriaceae    | FastDNA vs MagNAPure       |
| 579.211848 | -0.8687005 | 0.27121003 | -3.2030546 | 0.00135978 | 0.00787025 | Cryomorphaceae        | EasyDNA vs QIAstool        |
| 103.008126 | 1.06883487 | 0.34143186 | 3.13044852 | 0.0017454  | 0.00805134 | Enterococcaceae       | EasyDNA vs FastDNA         |
| 118.159531 | 1.5648585  | 0.47276645 | 3.31000327 | 0.00093295 | 0.00810499 | Rhodobacteraceae      | InnuPURE vs QIAstool       |
| 8.22875632 | 2.50314686 | 0.76230268 | 3.28366528 | 0.00102467 | 0.00813328 | Solibacteraceae       | PowerSoil.HMP vs QIAstool  |
| 20.5932418 | 2.47178571 | 0.77677805 | 3.18210037 | 0.00146211 | 0.00817699 | [Mogibacteriaceae]    | EasyDNA vs QIAstool+BB     |
| 49.8040986 | 2.25915369 | 0.59809529 | 3.7772471  | 0.00015857 | 0.00820607 | Actinomycetaceae      | InnuPURE vs MagNAPure      |
| 103.008126 | 1.68544012 | 0.47255029 | 3.56668943 | 0.00036152 | 0.00858467 | Enterococcaceae       | InnuPURE vs PowerSoil.HMP  |
| 622.632062 | 1.49623869 | 0.42421902 | 3.52704296 | 0.00042023 | 0.00858467 | Flavobacteriaceae     | InnuPURE vs PowerSoil.HMP  |
| 6.92597984 | -2.9939275 | 0.90591845 | -3.3048533 | 0.00095026 | 0.00860514 | [Chromatiaceae]       | EasyDNA vs InnuPURE        |
| 7.94601326 | 2.36493345 | 0.80553543 | 2.93585279 | 0.00332632 | 0.00863564 | Micrococcaceae        | EasyDNA vs MagNAPure       |
| 28.0267224 | 2.247816   | 0.69396685 | 3.23908267 | 0.00119915 | 0.00959318 | Succinivibrionaceae   | PowerSoil.HMP vs MagNAPure |
| 24.9235631 | -1.4990779 | 0.45978042 | -3.2604213 | 0.00111247 | 0.00959504 | [Bryobacteraceae]     | QIAstool vs MagNAPure      |
| 4421.89202 | 1.22665838 | 0.39306924 | 3.12071835 | 0.0018041  | 0.00972928 | Campylobacteraceae    | EasyDNA vs QIAstool+BB     |
| 736.495903 | 2.16738284 | 0.67437254 | 3.21392511 | 0.00130934 | 0.00978153 | Enterobacteriaceae    | PowerSoil.HMP vs QIAstool  |
| 19.2945448 | 1.55104302 | 0.48513414 | 3.19714258 | 0.00138796 | 0.00979285 | BA008                 | PowerSoil.HMP vs QIAstool  |
| 269.467613 | 2.67877514 | 0.85846322 | 3.12043087 | 0.00180587 | 0.01014472 | [Paraprevotellaceae]  | EasyDNA vs QIAstool        |
| 254.528648 | -1.2938909 | 0.42934953 | -3.0136073 | 0.00258162 | 0.01078984 | Xanthomonadaceae      | EasyDNA vs PowerSoil.HMP   |
| 4421.89202 | -1.2253129 | 0.38948425 | -3.1459884 | 0.00165527 | 0.01106414 | Campylobacteraceae    | PowerSoil.HMP vs QIAstool  |
| 60.913589  | -1.04435   | 0.3664465  | -2.8499385 | 0.00437277 | 0.01113818 | SB-1                  | EasyDNA vs MagNAPure       |
| 4234.46977 | -1.025778  | 0.3242894  | -3.163156  | 0.00156069 | 0.01115891 | Ruminococcaceae       | FastDNA vs QIAstool        |
| 17.3475351 | -2.6763124 | 0.799256   | -3.3485046 | 0.00081249 | 0.01146109 | Isosphaeraceae        | QIAstool+BB vs MagNAPure   |
| 622.632062 | -1.2115734 | 0.36458966 | -3.3231151 | 0.00089018 | 0.01146109 | Flavobacteriaceae     | QIAstool+BB vs MagNAPure   |
| 264.350163 | 0.85382433 | 0.2783669  | 3.0672624  | 0.00216029 | 0.01178902 | Leptotrichiaceae      | EasyDNA vs QIAstool        |
| 12.2684488 | 1.94066769 | 0.68710829 | 2.82439859 | 0.00473694 | 0.01184236 | Synergistaceae        | EasyDNA vs MagNAPure       |
| 993.963868 | -1.503144  | 0.50502245 | -2.9763905 | 0.00291663 | 0.01186219 | Opitutaceae           | EasyDNA vs PowerSoil.HMP   |
| 131.739477 | -1.0249579 | 0.34517249 | -2.969408  | 0.00298374 | 0.01186219 | Hyphomicrobiaceae     | EasyDNA vs PowerSoil.HMP   |
| 4.87640195 | 3.28815114 | 1.07742791 | 3.05185257 | 0.00227434 | 0.01206663 | Corynebacteriaceae    | EasyDNA vs QIAstool        |
| 31.145957  | 2.54682017 | 0.91162549 | 2.79371319 | 0.00521067 | 0.01278982 | Aerococcaceae         | EasyDNA vs MagNAPure       |
| 1110.97909 | -0.7305016 | 0.22421632 | -3.2580214 | 0.00112192 | 0.01283975 | Verrucomicrobiaceae   | QIAstool+BB vs MagNAPure   |
| 113.494552 | 1.40369726 | 0.44319404 | 3.16722954 | 0.00153899 | 0.0132029  | Alcaligenaceae        | EasyDNA vs InnuPURE        |
| 60.913589  | 1.09927041 | 0.35735416 | 3.07613715 | 0.00209701 | 0.01331604 | SB-1                  | PowerSoil.HMP vs QIAstool  |
| 4.06716246 | 2.70023017 | 0.85880434 | 3.14417387 | 0.00166556 | 0.01379087 | Elusimicrobiaceae     | QIAstool vs MagNAPure      |
| 49.8040986 | -1.671613  | 0.53708995 | -3.1123519 | 0.00185603 | 0.0139388  | Actinomycetaceae      | QIAstool vs MagNAPure      |
| 224.417038 | -1.2657762 | 0.40782434 | -3.103729  | 0.00191098 | 0.0139388  | Caulobacteraceae      | QIAstool vs MagNAPure      |
| 182.91656  | -0.9604176 | 0.30999369 | -3.0981843 | 0.0019471  | 0.0139388  | Planctomycetaceae     | QIAstool vs MagNAPure      |
| 858.112951 | -0.8756507 | 0.28271224 | -3.0973216 | 0.00195278 | 0.0139388  | Legionellaceae        | QIAstool vs MagNAPure      |
| 4830.98886 | 0.90318919 | 0.30567964 | 2.954692   | 0.00312981 | 0.01398635 | Moraxellaceae         | EasyDNA vs FastDNA         |
| 127.559639 | -1.1983362 | 0.38295763 | -3.1291612 | 0.00175306 | 0.01402449 | Bradyrhizobiaceae     | FastDNA vs PowerSoil.HMP   |
| 4.81963649 | -2.5920036 | 0.86507369 | -2.9962807 | 0.00273295 | 0.01410792 | auto67_4W             | EasyDNA vs QIAstool        |
| 3.21882027 | -2.9945197 | 1.02979292 | -2.9078853 | 0.00363882 | 0.01412208 | Geobacteraceae        | EasyDNA vs PowerSoil.HMP   |
| 103.008126 | 1.32628602 | 0.42621318 | 3.11179028 | 0.00185957 | 0.01422317 | Enterococcaceae       | EasyDNA vs InnuPURE        |
| 269.467613 | 3.07998123 | 0.99275227 | 3.10246708 | 0.00191915 | 0.01422317 | [Paraprevotellaceae]  | EasyDNA vs InnuPURE        |
| 28.7248963 | -2.1158352 | 0.68200314 | -3.1023834 | 0.00191969 | 0.01422317 | Acetobacteraceae      | EasyDNA vs InnuPURE        |
| 12.0832988 | 2.60257042 | 0.83588608 | 3.11354678 | 0.00184853 | 0.01511447 | Microthrixaceae       | InnuPURE vs QIAstool       |
| 15.0781299 | 1.90584145 | 0.64043532 | 2.9758531  | 0.00292175 | 0.01521324 | [Odoribacteraceae]    | EasyDNA vs QIAstool+BB     |
| 7.94601326 | -2.9156223 | 0.9471339  | -3.0783634 | 0.00208141 | 0.01522715 | Micrococcaceae        | QIAstool vs QIAstool+BB    |
| 118.339928 | -1.0389997 | 0.34156999 | -3.0418353 | 0.00235141 | 0.01531368 | [Chthoniobacteraceae] | FastDNA vs PowerSoil.HMP   |
| 4234.46977 | -1.0690832 | 0.35423431 | -3.0180115 | 0.00254439 | 0.01531368 | Ruminococcaceae       | FastDNA vs PowerSoil.HMP   |
| 719.094782 | 1.11333967 | 0.36942897 | 3.01367723 | 0.00258102 | 0.01531368 | Streptococcaceae      | FastDNA vs PowerSoil.HMP   |
| 169.692077 | 1.31061062 | 0.43885856 | 2.98640779 | 0.00282276 | 0.01531368 | Pirellulaceae         | FastDNA vs PowerSoil.HMP   |
| 283.625111 | 1.88675667 | 0.63288731 | 2.98118896 | 0.00287132 | 0.01531368 | Lactobacillaceae      | FastDNA vs PowerSoil.HMP   |
| 91.6048239 | -0.9688326 | 0.3376377  | -2.8694444 | 0.00411194 | 0.0153584  | Halomonadaceae        | EasyDNA vs PowerSoil.HMP   |
| 269.467613 | 2.62362002 | 0.91515855 | 2.86684753 | 0.00414583 | 0.0153584  | [Paraprevotellaceae]  | EasyDNA vs PowerSoil.HMP   |
| 169.692077 | -1.0885501 | 0.39949647 | -2.7248053 | 0.00643394 | 0.01551039 | Pirellulaceae         | EasyDNA vs MagNAPure       |
| 118.339928 | 0.85515562 | 0.31545607 | 2.71085484 | 0.006711   | 0.01589447 | [Chthoniobacteraceae] | EasyDNA vs MagNAPure       |
| 4.27355164 | -2.8506251 | 0.93680851 | -3.0429112 | 0.00234301 | 0.01628395 | Eubacteriaceae        | QIAstool vs QIAstool+BB    |
| 21.5427213 | 2.62816676 | 0.89319412 | 2.94243625 | 0.00325641 | 0.01636774 | Spirochaetaceae       | EasyDNA vs QIAstool        |
| 59.9667273 | 1.56849566 | 0.51094835 | 3.0697734  | 0.00214221 | 0.01654264 | Phyllobacteriaceae    | InnuPURE vs QIAstool       |
| 118.339928 | 1.19613294 | 0.39335639 | 3.04083768 | 0.00235921 | 0.01671962 | [Chthoniobacteraceae] | EasyDNA vs InnuPURE        |



|            |            |            |            |            |            |                       |                            |
|------------|------------|------------|------------|------------|------------|-----------------------|----------------------------|
| 224.417038 | -1.3016651 | 0.44367212 | -2.9338446 | 0.00334792 | 0.01673959 | Caulobacteraceae      | FastDNA vs PowerSoil.HMP   |
| 993.963868 | -1.499755  | 0.51224519 | -2.9278069 | 0.00341362 | 0.01679999 | Opitutaceae           | EasyDNA vs QIAStool+BB     |
| 131.739477 | -1.0909518 | 0.37302612 | -2.9245989 | 0.003449   | 0.01679999 | Hyphomicrobiaceae     | EasyDNA vs QIAStool+BB     |
| 21.5427213 | 2.53561288 | 0.94480086 | 2.68375379 | 0.00728007 | 0.01690336 | Spirochaetaceae       | EasyDNA vs MagNAPure       |
| 333.941631 | 1.06355661 | 0.39701881 | 2.67885697 | 0.00738739 | 0.01690336 | Porphyromonadaceae    | EasyDNA vs MagNAPure       |
| 28.7345598 | -1.6199105 | 0.55646094 | -2.9110947 | 0.00360165 | 0.01699528 | Parachlamydiaceae     | EasyDNA vs QIAStool+BB     |
| 21.4381793 | 2.87852569 | 0.94506216 | 3.04585858 | 0.00232017 | 0.01713356 | Turicibacteraceae     | PowerSoil.HMP vs MagNAPure |
| 118.159531 | -1.2291424 | 0.42307595 | -2.9052522 | 0.00366957 | 0.01726858 | Rhodobacteraceae      | FastDNA vs PowerSoil.HMP   |
| 104.663517 | 1.26962895 | 0.43903252 | 2.89187904 | 0.00382945 | 0.01732243 | Rikenellaceae         | EasyDNA vs QIAStool+BB     |
| 21.5427213 | 2.85758764 | 0.99453991 | 2.87327597 | 0.00406239 | 0.01732243 | Spirochaetaceae       | EasyDNA vs QIAStool+BB     |
| 1181.58837 | 2.53355579 | 0.88411161 | 2.86565152 | 0.00416152 | 0.01732243 | Prevotellaceae        | EasyDNA vs QIAStool+BB     |
| 355.031722 | 1.13809798 | 0.39794486 | 2.85993889 | 0.00423723 | 0.01732243 | [Weeksellaceae]       | EasyDNA vs QIAStool+BB     |
| 113.494552 | 1.15165021 | 0.40396852 | 2.85084148 | 0.00436037 | 0.01732243 | Alcaligenaceae        | EasyDNA vs QIAStool+BB     |
| 28.7248963 | -1.8378156 | 0.64637612 | -2.8432603 | 0.00446546 | 0.01732243 | Acetobacteraceae      | EasyDNA vs QIAStool+BB     |
| 118.339928 | 1.02243338 | 0.35967603 | 2.84265084 | 0.00447401 | 0.01732243 | [Chthoniobacteraceae] | EasyDNA vs QIAStool+BB     |
| 7.4067071  | -2.533754  | 0.89397879 | -2.834244  | 0.00459342 | 0.01734018 | Desulfobacteraceae    | EasyDNA vs QIAStool+BB     |
| 4.81963649 | -2.5721622 | 0.89514869 | -2.8734468 | 0.00406019 | 0.01759417 | auto67_4W             | EasyDNA vs FastDNA         |
| 38.1375375 | -1.588819  | 0.53677015 | -2.9599616 | 0.00307677 | 0.0176333  | Procabacteriaceae     | PowerSoil.HMP vs QIAStool  |
| 993.963868 | -1.4686531 | 0.49715551 | -2.9541121 | 0.0031357  | 0.0176333  | Opitutaceae           | PowerSoil.HMP vs QIAStool  |
| 377.356263 | 0.66481791 | 0.22547835 | 2.94847773 | 0.00319343 | 0.0176333  | Sphingobacteriaceae   | PowerSoil.HMP vs QIAStool  |
| 70.3986464 | 1.07418554 | 0.3564197  | 3.01382203 | 0.00257979 | 0.01780056 | Desulfovibrionaceae   | QIAStool vs MagNAPure      |
| 4830.98886 | 0.86879822 | 0.30910597 | 2.8106808  | 0.00494368 | 0.01820721 | Moraxellaceae         | EasyDNA vs QIAStool+BB     |
| 622.632062 | 1.20011256 | 0.39698082 | 3.02309962 | 0.002502   | 0.0183041  | Flavobacteriaceae     | InnuPURE vs QIAStool       |
| 22.1599751 | 2.34056949 | 0.78040891 | 2.99915784 | 0.00270727 | 0.01833074 | Sanguibacteriaceae    | FastDNA vs QIAStool        |
| 579.211848 | 0.84548558 | 0.2831535  | 2.98596192 | 0.00282688 | 0.01833074 | Cryomorpaceae         | FastDNA vs QIAStool        |
| 310.195483 | -1.1140138 | 0.37470056 | -2.9730774 | 0.0029483  | 0.01833074 | Aeromonadaceae        | FastDNA vs QIAStool        |
| 21.5427213 | 2.67648334 | 0.94093314 | 2.84449896 | 0.00444813 | 0.01841406 | Spirochaetaceae       | EasyDNA vs FastDNA         |
| 3.24919787 | 2.81122058 | 0.98975752 | 2.84031241 | 0.00450694 | 0.01841406 | Leuconostocaceae      | EasyDNA vs FastDNA         |
| 118.159531 | 1.14424238 | 0.39230985 | 2.91668023 | 0.00353778 | 0.01872077 | Rhodobacteraceae      | PowerSoil.HMP vs QIAStool  |
| 1181.58837 | 2.37174212 | 0.82321907 | 2.88105827 | 0.00396342 | 0.01884447 | Prevotellaceae        | EasyDNA vs QIAStool        |
| 4830.98886 | 0.79076118 | 0.27480994 | 2.87748395 | 0.0040086  | 0.01884447 | Moraxellaceae         | EasyDNA vs QIAStool        |
| 4.27355164 | 2.54518735 | 0.8853998  | 2.87461931 | 0.00404515 | 0.01884447 | Eubacteriaceae        | EasyDNA vs QIAStool        |
| 113.494552 | 1.15379451 | 0.38639387 | 2.98605802 | 0.00282599 | 0.01937822 | Alcaligenaceae        | PowerSoil.HMP vs MagNAPure |
| 92.6279814 | 1.64386434 | 0.5519235  | 2.97842786 | 0.00289731 | 0.01967758 | Oxalobacteraceae      | EasyDNA vs InnuPURE        |
| 18.7347412 | 1.74564306 | 0.58736763 | 2.97197698 | 0.00295889 | 0.01975774 | [Barnesiellaceae]     | QIAStool vs MagNAPure      |
| 24.9235631 | -1.9126891 | 0.64531773 | -2.9639494 | 0.00303718 | 0.01980243 | [Bryobacteraceae]     | EasyDNA vs InnuPURE        |
| 243.261282 | -1.0090776 | 0.33828228 | -2.9829456 | 0.00285489 | 0.01984147 | GZKB119               | InnuPURE vs QIAStool       |
| 12.0832988 | 1.9612567  | 0.7511158  | 2.61112429 | 0.00902451 | 0.02030515 | Microthrixaceae       | EasyDNA vs MagNAPure       |
| 2750.67146 | 1.28916277 | 0.43584769 | 2.95782861 | 0.00309814 | 0.02050676 | Bacteroidaceae        | QIAStool vs QIAStool+BB    |
| 243.261282 | -0.7295655 | 0.25759568 | -2.8322118 | 0.00462272 | 0.02102238 | GZKB119               | EasyDNA vs QIAStool        |
| 79.5100271 | -1.191318  | 0.43277484 | -2.7527432 | 0.00590982 | 0.0214067  | Bdellovibrionaceae    | EasyDNA vs PowerSoil.HMP   |
| 19.2945448 | -1.5596526 | 0.56244073 | -2.7730079 | 0.00555408 | 0.02193946 | BA008                 | EasyDNA vs FastDNA         |
| 11.2601759 | 2.50254376 | 0.90615756 | 2.76170929 | 0.00574997 | 0.02193946 | Peptococcaceae        | EasyDNA vs FastDNA         |
| 593.953594 | -0.62696   | 0.22739104 | -2.7571889 | 0.00583007 | 0.02193946 | Cytophagaceae         | EasyDNA vs FastDNA         |
| 10.9576795 | -2.0973714 | 0.76485713 | -2.7421741 | 0.0061034  | 0.02194317 | Acholeplasmataceae    | EasyDNA vs QIAStool+BB     |
| 593.953594 | -0.5824492 | 0.20721534 | -2.8108403 | 0.00494123 | 0.02194826 | Cytophagaceae         | EasyDNA vs QIAStool        |
| 993.963868 | 1.47204213 | 0.50450751 | 2.91778038 | 0.00352533 | 0.02227365 | Opitutaceae           | QIAStool vs QIAStool+BB    |
| 10.9576795 | -1.8987571 | 0.68029491 | -2.7910793 | 0.00525326 | 0.02280392 | Acholeplasmataceae    | EasyDNA vs FastDNA         |
| 7.4067071  | -2.284038  | 0.8363462  | -2.7309719 | 0.00631478 | 0.02315421 | Desulfobacteraceae    | EasyDNA vs FastDNA         |
| 1110.97909 | -0.5394896 | 0.18836632 | -2.8640448 | 0.00418269 | 0.02338949 | Verrucomicrobiaceae   | FastDNA vs QIAStool        |
| 377.356263 | 0.62991124 | 0.22044344 | 2.85747327 | 0.00427029 | 0.02338949 | Sphingobacteriaceae   | FastDNA vs QIAStool        |
| 24.9235631 | 1.29672979 | 0.45420932 | 2.85491676 | 0.00430481 | 0.02338949 | [Bryobacteraceae]     | FastDNA vs QIAStool        |
| 31.145957  | 2.57510178 | 0.90456212 | 2.84679374 | 0.0044162  | 0.02338949 | Aerococcaceae         | FastDNA vs QIAStool        |
| 12.9936921 | -1.8506044 | 0.72523789 | -2.5517205 | 0.01071925 | 0.02372292 | Hyphomonadaceae       | EasyDNA vs MagNAPure       |
| 355.031722 | 0.99703315 | 0.36955369 | 2.69793854 | 0.00697703 | 0.02431227 | [Weeksellaceae]       | EasyDNA vs PowerSoil.HMP   |
| 264.350163 | -0.8216819 | 0.30473801 | -2.6963553 | 0.00701029 | 0.02431227 | Leptotrichiaceae      | EasyDNA vs PowerSoil.HMP   |
| 2750.67146 | -1.2094344 | 0.42892542 | -2.8196845 | 0.00480709 | 0.02455049 | Bacteroidaceae        | FastDNA vs QIAStool        |
| 283.625111 | 1.74651589 | 0.61997486 | 2.81707535 | 0.00484632 | 0.02461928 | Lactobacillaceae      | PowerSoil.HMP vs QIAStool  |
| 79.5100271 | -1.2567499 | 0.46625307 | -2.6954243 | 0.00702991 | 0.02468641 | Bdellovibrionaceae    | EasyDNA vs QIAStool+BB     |
| 3668.6678  | 1.63743174 | 0.54128315 | 3.02509274 | 0.00248557 | 0.02560136 | Lachnospiraceae       | QIAStool+BB vs MagNAPure   |
| 44.0121162 | 1.43218661 | 0.52197913 | 2.74376222 | 0.00607395 | 0.02578055 | Microbacteriaceae     | EasyDNA vs QIAStool        |
| 1756.14884 | -0.8875915 | 0.35309787 | -2.5137266 | 0.0119463  | 0.02592108 | Neisseriaceae         | EasyDNA vs MagNAPure       |
| 18.7347412 | 1.55956336 | 0.62150923 | 2.50931647 | 0.01209651 | 0.02592108 | [Barnesiellaceae]     | EasyDNA vs MagNAPure       |
| 2750.67146 | -1.5115334 | 0.52589418 | -2.8742159 | 0.00405032 | 0.02611934 | Bacteroidaceae        | InnuPURE vs QIAStool       |
| 4.27355164 | 2.76832398 | 0.97008355 | 2.85369643 | 0.00432138 | 0.02611934 | Eubacteriaceae        | InnuPURE vs QIAStool       |

|            |            |            |            |            |            |                       |                           |
|------------|------------|------------|------------|------------|------------|-----------------------|---------------------------|
| 17.3475351 | 2.27655242 | 0.79776644 | 2.85365781 | 0.00432191 | 0.02611934 | Isosphaeraceae        | InnuPURE vs QIAStool      |
| 38.1375375 | -1.4159276 | 0.50824048 | -2.7859402 | 0.00533727 | 0.02631827 | Procabacteriaceae     | FastDNA vs QIAStool       |
| 2.3093169  | -2.8715958 | 1.08020362 | -2.6583838 | 0.00785164 | 0.02694541 | Myxococcaceae         | EasyDNA vs QIAStool+BB    |
| 2.31382502 | 3.1273455  | 1.10587857 | 2.82792847 | 0.00468503 | 0.02713412 | Nocardiaceae          | InnuPURE vs QIAStool      |
| 254.528648 | -1.1861816 | 0.44926195 | -2.6402895 | 0.00828352 | 0.02779582 | Xanthomonadaceae      | EasyDNA vs QIAStool+BB    |
| 8.22875632 | -2.3772037 | 0.9049355  | -2.6269316 | 0.00861586 | 0.02828251 | Solibacteraceae       | EasyDNA vs QIAStool+BB    |
| 4.06716246 | -2.6505323 | 0.9462686  | -2.8010358 | 0.00509389 | 0.02832201 | Elusimicrobiaceae     | InnuPURE vs QIAStool      |
| 224.417038 | -1.2142892 | 0.43070396 | -2.8193127 | 0.00481266 | 0.02908521 | Caulobacteraceae      | QIAStool vs QIAStool+BB   |
| 8.97993102 | -1.9720958 | 0.74525118 | -2.6462163 | 0.00813978 | 0.0290997  | Sediment-4            | EasyDNA vs FastDNA        |
| 1.55959833 | 3.04990549 | 1.10011358 | 2.77235509 | 0.00556523 | 0.02914922 | Dermatophilaceae      | InnuPURE vs QIAStool      |
| 31.145957  | 2.73793794 | 0.98959174 | 2.76673484 | 0.00566208 | 0.02914922 | Aerococcaceae         | InnuPURE vs QIAStool      |
| 164.684355 | 2.00560381 | 0.59200326 | 3.38782561 | 0.00070449 | 0.0291659  | Clostridiaceae        | InnuPURE vs MagNAPure     |
| 21.4381793 | 2.4029683  | 0.87615781 | 2.74262042 | 0.00609511 | 0.02977227 | Turicibacteraceae     | PowerSoil.HMP vs QIAStool |
| 22.1599751 | -2.2288796 | 0.7867898  | -2.8328781 | 0.0046131  | 0.02984097 | Sanguibacteraceae     | QIAStool vs MagNAPure     |
| 11.4855136 | -1.8652956 | 0.66110538 | -2.82148   | 0.00478026 | 0.02998528 | Gemmatimonadaceae     | QIAStool vs MagNAPure     |
| 7.76499835 | 2.08136474 | 0.84932062 | 2.4506231  | 0.01426092 | 0.03008163 | Victivallaceae        | EasyDNA vs MagNAPure      |
| 20.0435737 | -1.4557469 | 0.56093764 | -2.5952027 | 0.00945351 | 0.03037193 | Saprosiraceae         | EasyDNA vs QIAStool+BB    |
| 11.2601759 | 2.81611955 | 0.99962466 | 2.81717696 | 0.00484478 | 0.03037306 | Peptococcaceae        | EasyDNA vs InnuPURE       |
| 103.008126 | 1.51734838 | 0.45684108 | 3.32139215 | 0.0008957  | 0.03090151 | Enterococcaceae       | InnuPURE vs MagNAPure     |
| 639.445335 | -0.9363952 | 0.33454193 | -2.7990367 | 0.00512553 | 0.03114536 | Marinilabiaceae       | QIAStool vs MagNAPure     |
| 719.094782 | -0.9343259 | 0.33484933 | -2.7902876 | 0.00526612 | 0.03114536 | Streptococcaceae      | QIAStool vs MagNAPure     |
| 4.06716246 | 2.44686122 | 0.880977   | 2.77744052 | 0.00547889 | 0.03173189 | Elusimicrobiaceae     | QIAStool vs QIAStool+BB   |
| 858.112951 | -1.2104768 | 0.37506448 | -3.2273833 | 0.00124928 | 0.03314836 | Legionellaceae        | InnuPURE vs MagNAPure     |
| 1.55959833 | 3.53407623 | 1.09747746 | 3.22018115 | 0.0012811  | 0.03314836 | Dermatophilaceae      | InnuPURE vs MagNAPure     |
| 3.21882027 | -2.7128444 | 1.06112987 | -2.5565621 | 0.01057122 | 0.03325529 | Geobacteraceae        | EasyDNA vs QIAStool+BB    |
| 12.9936921 | -1.8610075 | 0.71942811 | -2.5867873 | 0.00968754 | 0.03378824 | Hyphomonadaceae       | EasyDNA vs FastDNA        |
| 49.8040986 | 1.33489132 | 0.52490846 | 2.54309356 | 0.01098758 | 0.03385969 | Actinomycetaceae      | EasyDNA vs QIAStool+BB    |
| 164.684355 | 1.20633872 | 0.46822066 | 2.57643208 | 0.00998258 | 0.03389918 | Clostridiaceae        | EasyDNA vs PowerSoil.HMP  |
| 2.61442095 | -2.3742008 | 0.98904022 | -2.4005099 | 0.01637225 | 0.0340039  | Ellin515              | EasyDNA vs MagNAPure      |
| 2750.67146 | 1.37968465 | 0.46764596 | 2.95027598 | 0.0031749  | 0.03433796 | Bacteroidaceae        | FastDNA vs MagNAPure      |
| 12.0832988 | 2.21601142 | 0.75663079 | 2.92878833 | 0.00340286 | 0.03433796 | Microthrixaceae       | FastDNA vs MagNAPure      |
| 2750.67146 | 1.02138586 | 0.38739727 | 2.63653347 | 0.00837579 | 0.03446271 | Bacteroidaceae        | EasyDNA vs QIAStool       |
| 2.90378317 | -2.6542909 | 1.00834595 | -2.6323217 | 0.00848035 | 0.03446271 | Shewanellaceae        | EasyDNA vs QIAStool       |
| 2.61442095 | -2.5754714 | 0.93748593 | -2.7472107 | 0.00601045 | 0.03456009 | Ellin515              | QIAStool vs MagNAPure     |
| 1.27584029 | -3.0144798 | 1.10165276 | -2.7363248 | 0.00621297 | 0.03475903 | Methanobacteriaceae   | QIAStool vs MagNAPure     |
| 4.18916425 | 2.38221387 | 0.99895023 | 2.38471727 | 0.01709225 | 0.03480958 | Nocardioidaceae       | EasyDNA vs MagNAPure      |
| 264.350163 | -0.71875   | 0.30189642 | -2.3807835 | 0.01727586 | 0.03480958 | Leptotrichiaceae      | EasyDNA vs MagNAPure      |
| 10.9576795 | -2.197664  | 0.79886476 | -2.7509837 | 0.00594166 | 0.03577349 | Acholeplasmataceae    | EasyDNA vs InnuPURE       |
| 1181.58837 | 2.64574182 | 0.96781367 | 2.73373057 | 0.00626213 | 0.03577349 | Prevotellaceae        | EasyDNA vs InnuPURE       |
| 59.9667273 | -1.4695546 | 0.54001007 | -2.7213466 | 0.00650165 | 0.03577349 | Phyllobacteriaceae    | EasyDNA vs InnuPURE       |
| 1.55959833 | -2.9910789 | 1.10080263 | -2.71718   | 0.00658408 | 0.03577349 | Dermatophilaceae      | EasyDNA vs InnuPURE       |
| 28.0267224 | 1.50756944 | 0.58964909 | 2.55672309 | 0.01056633 | 0.03597584 | Succinivibrionaceae   | EasyDNA vs FastDNA        |
| 616.023371 | -0.9908895 | 0.37159274 | -2.6666009 | 0.00766226 | 0.036041   | Veillonellaceae       | PowerSoil.HMP vs QIAStool |
| 131.739477 | -0.8564683 | 0.33629328 | -2.5467899 | 0.01087189 | 0.03615534 | Hyphomicrobiaceae     | EasyDNA vs FastDNA        |
| 186.231671 | 0.74799507 | 0.28674278 | 2.60859252 | 0.00909154 | 0.03617677 | Rhizobiaceae          | EasyDNA vs QIAStool       |
| 118.339928 | -0.9548824 | 0.33231545 | -2.8734217 | 0.00406052 | 0.03636071 | [Chthoniobacteraceae] | FastDNA vs MagNAPure      |
| 169.692077 | -1.1913895 | 0.4193644  | -2.8409409 | 0.00449807 | 0.03636071 | Pirellulaceae         | FastDNA vs MagNAPure      |
| 182.91656  | -0.9532472 | 0.33627107 | -2.8347584 | 0.00458604 | 0.03636071 | Planctomycetaceae     | FastDNA vs MagNAPure      |
| 91.6048239 | -0.7763827 | 0.32992933 | -2.3531788 | 0.01861368 | 0.03695363 | Halomonadaceae        | EasyDNA vs MagNAPure      |
| 22.1599751 | 1.97579153 | 0.77845518 | 2.53809287 | 0.01114584 | 0.03707698 | Sanguibacteraceae     | EasyDNA vs PowerSoil.HMP  |
| 28.7345598 | -1.2703451 | 0.50442951 | -2.5183798 | 0.01178961 | 0.03804106 | Parachlamydiaceae     | EasyDNA vs FastDNA        |
| 254.528648 | -1.068488  | 0.42623526 | -2.5068033 | 0.01218285 | 0.03804106 | Xanthomonadaceae      | EasyDNA vs FastDNA        |
| 6.92597984 | -2.0759884 | 0.82940286 | -2.5029916 | 0.01231485 | 0.03804106 | [Chromatiaceae]       | EasyDNA vs FastDNA        |
| 4421.89202 | 0.97253378 | 0.38938417 | 2.49762026 | 0.012503   | 0.03804106 | Campylobacteraceae    | EasyDNA vs FastDNA        |
| 993.963868 | -1.2539505 | 0.50404268 | -2.4877864 | 0.01285409 | 0.03829448 | Opiritaceae           | EasyDNA vs FastDNA        |
| 104.663517 | 1.15256553 | 0.42682061 | 2.70035119 | 0.00692663 | 0.03851207 | Rikenellaceae         | QIAStool vs QIAStool+BB   |
| 642.395629 | -0.8728261 | 0.37490681 | -2.3281148 | 0.01990601 | 0.03894653 | Rhodocyclaceae        | EasyDNA vs MagNAPure      |
| 6.92597984 | -1.9641006 | 0.84680666 | -2.3194203 | 0.02037226 | 0.03928935 | [Chromatiaceae]       | EasyDNA vs MagNAPure      |
| 3.5697885  | -2.663582  | 0.99480591 | -2.6774891 | 0.00741763 | 0.03965577 | Beutenbergiaceae      | QIAStool vs QIAStool+BB   |
| 8.22875632 | -2.0849652 | 0.8464636  | -2.4631481 | 0.0137723  | 0.04019264 | Solibacteraceae       | EasyDNA vs FastDNA        |
| 141.200238 | 0.87472846 | 0.33424873 | 2.61699863 | 0.00887067 | 0.04023482 | Chitinophagaceae      | PowerSoil.HMP vs QIAStool |
| 4421.89202 | 1.04015603 | 0.38905723 | 2.67352962 | 0.00750576 | 0.04080907 | Campylobacteraceae    | QIAStool vs MagNAPure     |
| 4.27355164 | -2.3695014 | 0.8889705  | -2.6654444 | 0.00768866 | 0.04080907 | Eubacteriaceae        | QIAStool vs MagNAPure     |
| 28.0267224 | 1.91589962 | 0.72230348 | 2.65248565 | 0.00799015 | 0.04095456 | Succinivibrionaceae   | EasyDNA vs InnuPURE       |
| 639.445335 | -1.1176738 | 0.42467418 | -2.6318384 | 0.00849243 | 0.04095456 | Marinilabiaceae       | EasyDNA vs InnuPURE       |

|            |            |            |            |            |            |                       |                            |
|------------|------------|------------|------------|------------|------------|-----------------------|----------------------------|
| 224.417038 | -1.3704338 | 0.52104201 | -2.6301791 | 0.00853399 | 0.04095456 | Caulobacteraceae      | EasyDNA vs InnuPURE        |
| 104.663517 | 1.25209331 | 0.47716645 | 2.62401793 | 0.00868992 | 0.04095456 | Rikenellaceae         | EasyDNA vs InnuPURE        |
| 4830.98886 | 0.9966009  | 0.38038735 | 2.61996329 | 0.00879392 | 0.04095456 | Moraxellaceae         | EasyDNA vs InnuPURE        |
| 21.5427213 | 2.3806915  | 0.95400598 | 2.49546812 | 0.01257911 | 0.04100788 | Spirochaetaceae       | EasyDNA vs PowerSoil.HMP   |
| 4.18916425 | 2.4527686  | 0.95878924 | 2.5581937  | 0.01052175 | 0.04101334 | Nocardioidaceae       | EasyDNA vs QIAstool        |
| 3.21882027 | -2.354502  | 1.02533773 | -2.2963185 | 0.02165768 | 0.04118009 | Geobacteriaceae       | EasyDNA vs MagNAPure       |
| 3668.6678  | 1.46196977 | 0.53675835 | 2.72370194 | 0.00645547 | 0.04131503 | Lachnospiraceae       | PowerSoil.HMP vs MagNAPure |
| 9.46385082 | -1.9959877 | 0.80350941 | -2.4840875 | 0.01298839 | 0.04151191 | Polyangiaceae         | EasyDNA vs PowerSoil.HMP   |
| 28.7248963 | -1.5390212 | 0.55585699 | -2.7687358 | 0.00562742 | 0.04164294 | Acetobacteraceae      | FastDNA vs MagNAPure       |
| 355.031722 | 1.0232927  | 0.39395485 | 2.59748725 | 0.00939086 | 0.04173716 | [Weeksellaceae]       | FastDNA vs PowerSoil.HMP   |
| 7.76499835 | 2.85424593 | 0.91600206 | 3.11598202 | 0.00183333 | 0.04216669 | Victivallaceae        | InnuPURE vs MagNAPure      |
| 104.663517 | 1.13861777 | 0.41527505 | 2.74184006 | 0.00610961 | 0.04238541 | Rikenellaceae         | FastDNA vs MagNAPure       |
| 4421.89202 | 1.03709142 | 0.39261611 | 2.64148974 | 0.00825423 | 0.042494   | Campylobacteraceae    | QIAstool vs QIAstool+BB    |
| 622.632062 | 0.81772245 | 0.33204467 | 2.4626881  | 0.01378998 | 0.04266148 | Flavobacteriaceae     | EasyDNA vs PowerSoil.HMP   |
| 4.87640195 | 2.6847996  | 1.09159219 | 2.45952621 | 0.01391205 | 0.04266148 | Corynebacteriaceae    | EasyDNA vs PowerSoil.HMP   |
| 3.24919787 | 2.49848134 | 1.01818471 | 2.45385864 | 0.01413325 | 0.04266148 | Leuconostocaceae      | EasyDNA vs PowerSoil.HMP   |
| 28.7345598 | -1.1664509 | 0.51264479 | -2.275359  | 0.02288441 | 0.04290826 | Parachlamydiaceae     | EasyDNA vs MagNAPure       |
| 377.356263 | -0.5824062 | 0.2219046  | -2.6245793 | 0.00867561 | 0.04489627 | Sphingobacteriaceae   | QIAstool vs MagNAPure      |
| 2.31382502 | -2.5964006 | 1.07577379 | -2.4135191 | 0.0157993  | 0.045186   | Nocardiaceae          | EasyDNA vs FastDNA         |
| 719.094782 | -1.0989013 | 0.39008341 | -2.8170931 | 0.00484605 | 0.04537662 | Streptococcaceae      | QIAstool+BB vs MagNAPure   |
| 642.395629 | -0.8990233 | 0.37439073 | -2.4012969 | 0.01633708 | 0.04580788 | Rhodocyclaceae        | EasyDNA vs FastDNA         |
| 28.0267224 | 2.05253499 | 0.73852611 | 2.77923143 | 0.00544877 | 0.04586337 | Succinivibrionaceae   | QIAstool+BB vs MagNAPure   |
| 2750.67146 | 1.29995626 | 0.47394333 | 2.74285169 | 0.00609082 | 0.04586337 | Bacteroidaceae        | QIAstool+BB vs MagNAPure   |
| 355.031722 | -1.1521059 | 0.42121139 | -2.7352202 | 0.00623386 | 0.04586337 | [Weeksellaceae]       | QIAstool+BB vs MagNAPure   |
| 141.200238 | -0.9400847 | 0.36121392 | -2.6025706 | 0.00925278 | 0.04593342 | Chitinophagaceae      | QIAstool vs QIAstool+BB    |
| 164.684355 | 1.34712441 | 0.50064185 | 2.69079464 | 0.00712821 | 0.04654299 | Clostridiaceae        | FastDNA vs MagNAPure       |
| 59.9667273 | -1.7611005 | 0.48922251 | -3.5997946 | 0.00031847 | 0.04757822 | Phyllobacteriaceae    | FastDNA vs QIAstool+BB     |
| 118.159531 | -1.5582244 | 0.44756329 | -3.4815733 | 0.00049848 | 0.04757822 | Rhodobacteraceae      | FastDNA vs QIAstool+BB     |
| 858.112951 | -1.1709513 | 0.34503626 | -3.393705  | 0.00068954 | 0.04757822 | Legionellaceae        | FastDNA vs QIAstool+BB     |
| 44.0121162 | -1.2198065 | 0.54714401 | -2.2294067 | 0.02578686 | 0.04768803 | Microbacteriaceae     | EasyDNA vs MagNAPure       |
| 1756.14884 | -1.401038  | 0.46013475 | -3.0448428 | 0.00232802 | 0.04819001 | Neisseriaceae         | InnuPURE vs MagNAPure      |
| 1756.14884 | -1.1234205 | 0.43466028 | -2.5845943 | 0.00974937 | 0.04839863 | Neisseriaceae         | InnuPURE vs QIAstool       |
| 8.97993102 | -1.6808038 | 0.75875734 | -2.215206  | 0.02674593 | 0.04879324 | Sediment-4            | EasyDNA vs MagNAPure       |
| 3668.6678  | 1.90277585 | 0.63250342 | 3.00832499 | 0.00262692 | 0.04943387 | Lachnospiraceae       | InnuPURE vs MagNAPure      |
| 164.684355 | 1.08879511 | 0.4606952  | 2.36337412 | 0.01810938 | 0.04980079 | Clostridiaceae        | EasyDNA vs FastDNA         |
| 79.5100271 | -0.9798214 | 0.380222   | -2.5769718 | 0.00996701 | 0.05032123 | Bdellovibrionaceae    | QIAstool vs MagNAPure      |
| 186.231671 | -0.7151168 | 0.30408292 | -2.3517165 | 0.01868701 | 0.05041968 | Rhizobiaceae          | EasyDNA vs FastDNA         |
| 44.0121162 | -1.4843431 | 0.56162354 | -2.6429504 | 0.00821871 | 0.05068203 | Microbacteriaceae     | FastDNA vs MagNAPure       |
| 7.94601326 | 2.35096963 | 0.93228322 | 2.52173329 | 0.01167782 | 0.0511408  | Micrococcaceae        | PowerSoil.HMP vs QIAstool  |
| 333.941631 | 0.99974328 | 0.39058752 | 2.55958841 | 0.01047962 | 0.05164955 | Porphyromonadaceae    | QIAstool vs MagNAPure      |
| 19.2945448 | -1.6538315 | 0.65473079 | -2.5259718 | 0.01153788 | 0.05224094 | BA008                 | EasyDNA vs InnuPURE        |
| 169.692077 | 1.21462904 | 0.47776311 | 2.5423249  | 0.01101178 | 0.05253157 | Pirellulaceae         | InnuPURE vs QIAstool       |
| 28.0267224 | -1.7810983 | 0.703404   | -2.5321129 | 0.01133775 | 0.05253157 | Succinivibrionaceae   | InnuPURE vs QIAstool       |
| 118.339928 | 0.77103841 | 0.32521728 | 2.37084086 | 0.01774767 | 0.05259764 | [Chthoniobacteraceae] | EasyDNA vs PowerSoil.HMP   |
| 22.2584553 | 1.82334122 | 0.76805203 | 2.37398139 | 0.01759744 | 0.05314426 | S24-7                 | EasyDNA vs QIAstool+BB     |
| 3.24919787 | 2.62550795 | 1.04618943 | 2.50959136 | 0.01208709 | 0.05324855 | Leuconostocaceae      | EasyDNA vs InnuPURE        |
| 243.261282 | -0.6779435 | 0.28737692 | -2.3590743 | 0.01832059 | 0.053326   | GZKB119               | EasyDNA vs PowerSoil.HMP   |
| 70.3986464 | 1.1324594  | 0.45348268 | 2.49724953 | 0.01251608 | 0.05368742 | Desulfovibrionaceae   | EasyDNA vs InnuPURE        |
| 7.94601326 | 1.90646899 | 0.81181724 | 2.34839678 | 0.01885442 | 0.05391704 | Micrococcaceae        | EasyDNA vs PowerSoil.HMP   |
| 129.664767 | -1.213787  | 0.48816066 | -2.4864499 | 0.01290247 | 0.05392572 | Sphingomonadaceae     | EasyDNA vs InnuPURE        |
| 12.0832988 | 2.17200442 | 0.8174185  | 2.65715106 | 0.00788041 | 0.05411217 | Microthrixaceae       | QIAstool+BB vs MagNAPure   |
| 28.0267224 | 1.75955604 | 0.67705141 | 2.59885144 | 0.00935362 | 0.05464486 | Succinivibrionaceae   | FastDNA vs MagNAPure       |
| 622.632062 | -0.7523083 | 0.32535862 | -2.3122433 | 0.02076428 | 0.05498688 | Flavobacteriaceae     | EasyDNA vs FastDNA         |
| 579.211848 | 0.70977486 | 0.28578343 | 2.48361094 | 0.01300578 | 0.05505781 | Cryomorpaceae         | PowerSoil.HMP vs QIAstool  |
| 11.2601759 | 2.2792279  | 0.96857952 | 2.35316549 | 0.01861435 | 0.05511307 | Peptococcaceae        | EasyDNA vs QIAstool+BB     |
| 22.9873604 | -2.4720555 | 0.97855392 | -2.5262333 | 0.01152929 | 0.05526107 | Staphylococcaceae     | QIAstool vs QIAstool+BB    |
| 310.195483 | 1.0118008  | 0.40293184 | 2.51109669 | 0.01203567 | 0.05576528 | Aeromonadaceae        | QIAstool vs QIAstool+BB    |
| 6.96503794 | 1.90349744 | 0.77276169 | 2.46323991 | 0.01376878 | 0.05640756 | Piscirickettsiaceae   | PowerSoil.HMP vs QIAstool  |
| 224.417038 | -0.9883822 | 0.43171742 | -2.2894192 | 0.02205501 | 0.05734302 | Caulobacteraceae      | EasyDNA vs FastDNA         |
| 2.31382502 | -2.7483795 | 1.10394795 | -2.4895916 | 0.012789   | 0.05734421 | Nocardiaceae          | QIAstool vs QIAstool+BB    |
| 182.91656  | -0.6936928 | 0.32325492 | -2.145962  | 0.03187601 | 0.05737304 | Planctomycetaceae     | EasyDNA vs MagNAPure       |
| 3.14112548 | -2.3181345 | 1.08289035 | -2.1406919 | 0.0322989  | 0.05737304 | OM60                  | EasyDNA vs MagNAPure       |
| 186.231671 | -0.9118034 | 0.37170792 | -2.4530104 | 0.01416662 | 0.05772899 | Rhizobiaceae          | EasyDNA vs InnuPURE        |
| 5.49329045 | -1.8319005 | 0.72941169 | -2.5114767 | 0.01202272 | 0.05787682 | Cyclobacteriaceae     | QIAstool vs MagNAPure      |
| 8.97993102 | -2.0613208 | 0.84378326 | -2.4429505 | 0.01456773 | 0.05791562 | Sediment-4            | EasyDNA vs InnuPURE        |

|            |            |            |            |            |            |                       |                              |
|------------|------------|------------|------------|------------|------------|-----------------------|------------------------------|
| 12.2684488 | -1.5691396 | 0.64325243 | -2.4393838 | 0.01471233 | 0.05838958 | Synergistaceae        | PowerSoil.HMP vs QIAStool    |
| 104.663517 | 0.87151266 | 0.3830252  | 2.27534024 | 0.02288553 | 0.05843983 | Rikenellaceae         | EasyDNA vs FastDNA           |
| 127.559639 | -0.9708623 | 0.3795923  | -2.5576449 | 0.01053836 | 0.05848792 | Bradyrhizobiaceae     | FastDNA vs MagNAPure         |
| 11.4855136 | 1.65096216 | 0.68095654 | 2.42447508 | 0.01533054 | 0.05899933 | Gemmatimonadaceae     | PowerSoil.HMP vs QIAStool    |
| 4830.98886 | 0.64823777 | 0.30574015 | 2.12022453 | 0.03398711 | 0.0595878  | Moraxellaceae         | EasyDNA vs MagNAPure         |
| 4234.46977 | 0.80709372 | 0.3244551  | 2.48753594 | 0.01286315 | 0.06051525 | Ruminococcaceae       | QIAStool vs MagNAPure        |
| 6.96503794 | 1.86675561 | 0.74910667 | 2.49197568 | 0.01270347 | 0.06055322 | Piscirickettsiaceae   | FastDNA vs QIAStool          |
| 377.356263 | -0.5435773 | 0.23659302 | -2.2975206 | 0.02158909 | 0.06067279 | Sphingobacteriaceae   | EasyDNA vs PowerSoil.HMP     |
| 579.211848 | 0.87084781 | 0.35361388 | 2.46270821 | 0.01378921 | 0.06068046 | Cryomorphaceae        | InnuPURE vs QIAStool         |
| 50.9419349 | 1.38093288 | 0.56180151 | 2.45804409 | 0.0139696  | 0.06068046 | Desulfobulbaceae      | InnuPURE vs QIAStool         |
| 6.92597984 | -1.9786325 | 0.86497437 | -2.2875042 | 0.02216641 | 0.06123941 | [Chromatiaceae]       | EasyDNA vs PowerSoil.HMP     |
| 16.3205056 | -1.7055823 | 0.7409508  | -2.3018834 | 0.02134175 | 0.06197316 | Methylophilaceae      | EasyDNA vs QIAStool+BB       |
| 113.494552 | -0.8384629 | 0.34080263 | -2.4602596 | 0.01388365 | 0.06234019 | Alcaligenaceae        | FastDNA vs QIAStool          |
| 70.3986464 | -0.8486684 | 0.34519175 | -2.4585418 | 0.01395025 | 0.06234019 | Desulfovibrionaceae   | FastDNA vs QIAStool          |
| 355.031722 | -1.0110411 | 0.39463636 | -2.5619562 | 0.01040844 | 0.06245066 | [Weeksellaceae]       | PowerSoil.HMP vs MagNAPure   |
| 47.3908296 | -0.9325292 | 0.38114769 | -2.4466348 | 0.01441969 | 0.06248531 | Christensenellaceae   | FastDNA vs QIAStool          |
| 104.663517 | -1.1350299 | 0.46606219 | -2.4353614 | 0.01487692 | 0.06266339 | Rikenellaceae         | InnuPURE vs QIAStool         |
| 4.18916425 | 2.29762813 | 1.0113383  | 2.27186899 | 0.02309442 | 0.06273985 | Nocardioidaceae       | EasyDNA vs PowerSoil.HMP     |
| 28.0267224 | -1.3727681 | 0.56486719 | -2.4302494 | 0.01508844 | 0.06346019 | Succinivibrionaceae   | FastDNA vs QIAStool          |
| 264.350163 | 0.8838018  | 0.36532112 | 2.41924641 | 0.0155527  | 0.0635831  | Leptotrichiaceae      | InnuPURE vs QIAStool         |
| 113.494552 | -1.0371853 | 0.43307898 | -2.3949102 | 0.01662443 | 0.06456144 | Alcaligenaceae        | InnuPURE vs QIAStool         |
| 33.4444509 | 2.01392801 | 0.8425903  | 2.39016283 | 0.0168409  | 0.06456144 | Coriobacteriaceae     | InnuPURE vs QIAStool         |
| 3.5697885  | 2.44429648 | 1.0258444  | 2.38271659 | 0.01718542 | 0.06456144 | Beutenbergiaceae      | InnuPURE vs QIAStool         |
| 103.008126 | 1.10013504 | 0.42775185 | 2.57190011 | 0.01011421 | 0.06511021 | Enterococcaceae       | QIAStool+BB vs MagNAPure     |
| 649.223144 | 0.86594468 | 0.34641928 | 2.49970117 | 0.01242981 | 0.06570043 | Bifidobacteriaceae    | FastDNA vs MagNAPure         |
| 164.684355 | 1.13212163 | 0.49900063 | 2.26877795 | 0.02328183 | 0.06633126 | Clostridiaceae        | EasyDNA vs QIAStool+BB       |
| 28.7248963 | 1.22866154 | 0.51896204 | 2.36753646 | 0.01790696 | 0.06688775 | Acetobacteraceae      | PowerSoil.HMP vs QIAStool    |
| 186.231671 | -0.6985777 | 0.3119467  | -2.2394135 | 0.02512902 | 0.06714804 | Rhizobiaceae          | EasyDNA vs PowerSoil.HMP     |
| 3.21882027 | -2.2403395 | 1.01657284 | -2.203816  | 0.02753729 | 0.06722862 | Geobacteraceae        | EasyDNA vs FastDNA           |
| 243.261282 | -0.6192531 | 0.28126021 | -2.2017089 | 0.02768588 | 0.06722862 | GZKB119               | EasyDNA vs FastDNA           |
| 4.87640195 | 2.37711291 | 1.0817303  | 2.19750978 | 0.02798406 | 0.06722862 | Corynebacteriaceae    | EasyDNA vs FastDNA           |
| 377.356263 | -0.5086707 | 0.23180568 | -2.194384  | 0.02820781 | 0.06722862 | Sphingobacteriaceae   | EasyDNA vs FastDNA           |
| 4.27355164 | 2.11193339 | 0.88047945 | 2.39861747 | 0.0164571  | 0.067239   | Eubacteriaceae        | FastDNA vs QIAStool          |
| 264.350163 | -0.7890883 | 0.32627137 | -2.4185032 | 0.01558451 | 0.06769521 | Leptotrichiaceae      | QIAStool vs QIAStool+BB      |
| 17.3475351 | -1.9832942 | 0.83527701 | -2.3744149 | 0.01757679 | 0.06821467 | Isosphaeraceae        | EasyDNA vs InnuPURE          |
| 1181.58837 | 1.95342448 | 0.88069728 | 2.21804306 | 0.0265519  | 0.06980579 | Prevotellaceae        | EasyDNA vs PowerSoil.HMP     |
| 19.2945448 | -1.2707305 | 0.53094712 | -2.3933277 | 0.01669632 | 0.07032693 | BA008                 | QIAStool vs QIAStool+BB      |
| 3.24919787 | 2.02439771 | 0.98885767 | 2.04720839 | 0.04063763 | 0.07033436 | Leuconostocaceae      | EasyDNA vs MagNAPure         |
| 70.3986464 | 0.99071862 | 0.39671413 | 2.49731114 | 0.01251391 | 0.07066679 | Desulfovibrionaceae   | PowerSoil.HMP vs MagNAPure   |
| 22.1599751 | 1.53415787 | 0.75524233 | 2.03134519 | 0.04221999 | 0.07214808 | Sanguibacteraceae     | EasyDNA vs MagNAPure         |
| 79.5100271 | 0.88963046 | 0.37786776 | 2.35434341 | 0.01855546 | 0.0724779  | Bdellovibrionaceae    | FastDNA vs QIAStool          |
| 5.49329045 | 1.69380301 | 0.72064323 | 2.3504044  | 0.01875302 | 0.0724779  | Cyclobacteriaceae     | FastDNA vs QIAStool          |
| 4.81963649 | -2.3118932 | 0.98963119 | -2.336116  | 0.0194852  | 0.07386249 | auto67_4W             | EasyDNA vs InnuPURE          |
| 2.55199853 | -2.2827904 | 1.04339628 | -2.187846  | 0.02868082 | 0.07420014 | Holophagaceae         | EasyDNA vs PowerSoil.HMP     |
| 182.91656  | 0.73524789 | 0.33701129 | 2.18167136 | 0.0291338  | 0.07420014 | Planctomycetaceae     | EasyDNA vs PowerSoil.HMP     |
| 22.9873604 | 2.14709978 | 0.91924374 | 2.33572414 | 0.01950562 | 0.07451148 | Staphylococcaceae     | EasyDNA vs QIAStool          |
| 642.395629 | -0.8615187 | 0.3894487  | -2.2121495 | 0.02695634 | 0.07537791 | Rhodocyclaceae        | EasyDNA vs QIAStool+BB       |
| 1.01494259 | -2.6305311 | 1.10333506 | -2.3841635 | 0.017118   | 0.07685828 | Gemmataceae           | QIAStool vs MagNAPure        |
| 310.195483 | 0.8934204  | 0.37551544 | 2.37918422 | 0.017351   | 0.07685828 | Aeromonadaceae        | QIAStool vs MagNAPure        |
| 254.528648 | -0.9770092 | 0.41101457 | -2.3770671 | 0.01745091 | 0.07685828 | Xanthomonadaceae      | QIAStool vs MagNAPure        |
| 4.06716246 | -1.8067423 | 0.77930346 | -2.3184066 | 0.02042724 | 0.07687091 | Elusimicrobiaceae     | FastDNA vs QIAStool          |
| 19.2945448 | -1.1273417 | 0.47588079 | -2.3689582 | 0.01783827 | 0.07692754 | BA008                 | QIAStool vs MagNAPure        |
| 4.81963649 | -2.1101927 | 0.9610752  | -2.1956582 | 0.02811642 | 0.07719234 | auto67_4W             | EasyDNA vs QIAStool+BB       |
| 2.3093169  | -2.3470892 | 1.01440126 | -2.313768  | 0.02068045 | 0.07745031 | Myxococcaceae         | EasyDNA vs QIAStool          |
| 22.5747955 | 1.12730926 | 0.52924208 | 2.13004465 | 0.03316793 | 0.07775432 | Peptostreptococcaceae | EasyDNA vs FastDNA           |
| 736.495903 | 2.47243917 | 0.73392038 | 3.36881115 | 0.00075493 | 0.07813539 | Enterobacteriaceae    | PowerSoil.HMP vs QIAStool+BB |
| 22.9873604 | 1.9190924  | 0.96704297 | 1.98449547 | 0.04720063 | 0.07965107 | Staphylococcaceae     | EasyDNA vs MagNAPure         |
| 164.684355 | 1.22958079 | 0.50750114 | 2.42281388 | 0.01540081 | 0.07974548 | Clostridiaceae        | PowerSoil.HMP vs MagNAPure   |
| 4234.46977 | 0.850399   | 0.35438523 | 2.39964574 | 0.01641095 | 0.07974548 | Ruminococcaceae       | PowerSoil.HMP vs MagNAPure   |
| 141.200238 | 0.87189043 | 0.36402356 | 2.39514836 | 0.01661364 | 0.07974548 | Chitinophagaceae      | PowerSoil.HMP vs MagNAPure   |
| 649.223144 | -0.8825037 | 0.37134215 | -2.3765246 | 0.0174766  | 0.07989301 | Bifidobacteriaceae    | PowerSoil.HMP vs MagNAPure   |
| 377.356263 | -0.4611657 | 0.23319393 | -1.9776057 | 0.0479732  | 0.07995534 | Sphingobacteriaceae   | EasyDNA vs MagNAPure         |
| 13.1651756 | -1.4992527 | 0.69891407 | -2.1451174 | 0.03194346 | 0.08010438 | Helicobacteraceae     | EasyDNA vs PowerSoil.HMP     |
| 182.91656  | 1.18518163 | 0.41749716 | 2.83877771 | 0.00452867 | 0.08094996 | Planctomycetaceae     | InnuPURE vs PowerSoil.HMP    |
| 1.55959833 | 3.06644109 | 1.09689413 | 2.79556704 | 0.00518088 | 0.08231836 | Dermatophilaceae      | InnuPURE vs PowerSoil.HMP    |

|            |            |            |            |            |            |                     |                              |
|------------|------------|------------|------------|------------|------------|---------------------|------------------------------|
| 131.739477 | -0.797345  | 0.33199055 | -2.4017101 | 0.01631864 | 0.08233494 | Hyphomicrobiaceae   | FastDNA vs MagNAPure         |
| 131.739477 | -0.9313915 | 0.40909714 | -2.2767002 | 0.02280414 | 0.08447896 | Hyphomicrobiaceae   | EasyDNA vs InnuPURE          |
| 13.1651756 | -1.4567213 | 0.64093998 | -2.272789  | 0.0230389  | 0.08462364 | Helicobacteraceae   | EasyDNA vs QIAstool          |
| 579.211848 | -0.6602391 | 0.2839074  | -2.3255439 | 0.0200429  | 0.08467101 | Cryomorphaeae       | QIAstool vs MagNAPure        |
| 92.6279814 | -0.9949071 | 0.43808997 | -2.2710109 | 0.02314632 | 0.08486984 | Oxalobacteraceae    | FastDNA vs QIAstool          |
| 29.0135086 | -1.2323803 | 0.54478605 | -2.2621363 | 0.02368898 | 0.08536974 | Alteromonadaceae    | EasyDNA vs QIAstool          |
| 243.261282 | -0.6671317 | 0.31081555 | -2.1463909 | 0.0318418  | 0.08585914 | GZKB119             | EasyDNA vs QIAstool+BB       |
| 38.1375375 | 1.08211604 | 0.55767402 | 1.94040963 | 0.05232993 | 0.08615293 | Procabacteriaceae   | EasyDNA vs MagNAPure         |
| 505.493872 | -1.0047589 | 0.43784747 | -2.2947692 | 0.02174636 | 0.08647001 | Erysipelotrichaceae | QIAstool vs QIAstool+BB      |
| 4.18916425 | -2.3294501 | 1.0153187  | -2.2943043 | 0.02177303 | 0.08647001 | Nocardiodiaceae     | QIAstool vs QIAstool+BB      |
| 11.4855136 | -1.3573909 | 0.70420385 | -1.927554  | 0.05391063 | 0.08768596 | Gemmatimonadaceae   | EasyDNA vs MagNAPure         |
| 5.49329045 | -1.5087589 | 0.78541121 | -1.9209795 | 0.05473429 | 0.08796582 | Cyclobacteriaceae   | EasyDNA vs MagNAPure         |
| 3.07801265 | 2.12104453 | 0.94429648 | 2.24616376 | 0.02469352 | 0.08827934 | Caldilineaceae      | FastDNA vs QIAstool          |
| 719.094782 | 0.74746237 | 0.33440796 | 2.23518117 | 0.02540546 | 0.08860928 | Streptococcaceae    | FastDNA vs QIAstool          |
| 254.528648 | 0.93025684 | 0.41369801 | 2.24863746 | 0.02453557 | 0.08902907 | Xanthomonadaceae    | PowerSoil.HMP vs QIAstool    |
| 20.0435737 | -1.0503917 | 0.50791832 | -2.0680327 | 0.03863694 | 0.08911424 | Saprosiraceae       | EasyDNA vs FastDNA           |
| 164.684355 | 1.30379789 | 0.53572935 | 2.43368761 | 0.01494589 | 0.0905545  | Clostridiaceae      | QIAstool+BB vs MagNAPure     |
| 141.200238 | 0.93724671 | 0.38880135 | 2.41060559 | 0.01592606 | 0.09113246 | Chitinophagaceae    | QIAstool+BB vs MagNAPure     |
| 377.356263 | 0.62154676 | 0.27788464 | 2.23670791 | 0.02530544 | 0.09256462 | Sphingobacteriaceae | InnuPURE vs QIAstool         |
| 33.4444509 | -1.6904111 | 0.74230936 | -2.2772326 | 0.02277234 | 0.09427748 | Coriobacteriaceae   | QIAstool vs MagNAPure        |
| 105.619852 | -1.021215  | 0.44996553 | -2.2695406 | 0.02323547 | 0.09430867 | Nitrosomonadaceae   | QIAstool vs MagNAPure        |
| 22.1599751 | 1.78724592 | 0.80863491 | 2.21020129 | 0.0270912  | 0.09439858 | Sanguibacteraceae   | PowerSoil.HMP vs QIAstool    |
| 4.81963649 | -1.8045008 | 0.81885869 | -2.2036779 | 0.027547   | 0.09439858 | auto67_4W           | PowerSoil.HMP vs QIAstool    |
| 50.9419349 | 1.03667507 | 0.47253405 | 2.1938632  | 0.02824525 | 0.09439858 | Desulfobulbaceae    | PowerSoil.HMP vs QIAstool    |
| 8.22875632 | -1.847976  | 0.8213212  | -2.2500041 | 0.02444869 | 0.0943991  | Solibacteraceae     | QIAstool vs QIAstool+BB      |
| 29.0135086 | -1.1098265 | 0.58897604 | -1.8843321 | 0.05952006 | 0.09453186 | Alteromonadaceae    | EasyDNA vs MagNAPure         |
| 91.6048239 | -0.7732133 | 0.36814481 | -2.1002967 | 0.03570275 | 0.09458097 | Halomonadaceae      | EasyDNA vs QIAstool+BB       |
| 2.3093169  | -2.2044833 | 1.06566745 | -2.0686409 | 0.0385798  | 0.09503659 | Myxococcaceae       | EasyDNA vs PowerSoil.HMP     |
| 642.395629 | -0.7773137 | 0.37669477 | -2.0635108 | 0.03906412 | 0.09503659 | Rhodocyclaceae      | EasyDNA vs PowerSoil.HMP     |
| 118.159531 | -1.6497585 | 0.49812382 | -3.3119446 | 0.0009265  | 0.09589264 | Rhodobacteraceae    | FastDNA vs InnuPURE          |
| 49.8040986 | -1.915968  | 0.59985447 | -3.1940546 | 0.0014029  | 0.0967998  | Actinomycetaceae    | PowerSoil.HMP vs QIAstool+BB |
| 31.145957  | -2.1008028 | 0.92480483 | -2.2716174 | 0.02310963 | 0.0973037  | Aerococcaceae       | FastDNA vs PowerSoil.HMP     |
| 15.0781299 | 1.10535598 | 0.54633858 | 2.02320688 | 0.04305182 | 0.0977208  | [Odoribacteraceae]  | EasyDNA vs FastDNA           |
| 44.0121162 | -1.4733537 | 0.62305494 | -2.3647251 | 0.01804346 | 0.09781453 | Microbacteriaceae   | QIAstool+BB vs MagNAPure     |
| 1756.14884 | -1.2328734 | 0.46055978 | -2.6769019 | 0.00743064 | 0.09793244 | Neisseriaceae       | InnuPURE vs PowerSoil.HMP    |
| 243.261282 | -0.9574556 | 0.36120868 | -2.6506993 | 0.00803253 | 0.09793244 | GZKB119             | InnuPURE vs PowerSoil.HMP    |
| 44.0121162 | 1.80866043 | 0.68432745 | 2.64297515 | 0.00821811 | 0.09793244 | Microbacteriaceae   | InnuPURE vs PowerSoil.HMP    |
| 2.61442095 | 2.04322522 | 0.93447232 | 2.18650159 | 0.02877893 | 0.0979854  | Ellin515            | FastDNA vs QIAstool          |
| 10.9576795 | -1.3578423 | 0.72891946 | -1.8628152 | 0.06248827 | 0.09809204 | Acholeplasmataceae  | EasyDNA vs MagNAPure         |
| 593.953594 | -0.6205976 | 0.28170633 | -2.2029949 | 0.0275951  | 0.09841013 | Cytophagaceae       | EasyDNA vs InnuPURE          |
| 28.7345598 | -1.3134923 | 0.59690916 | -2.2004895 | 0.02777218 | 0.09841013 | Parachlamydiaceae   | EasyDNA vs InnuPURE          |
| 22.2584553 | 1.27850913 | 0.68878738 | 1.85617385 | 0.06342878 | 0.09842397 | S24-7               | EasyDNA vs MagNAPure         |
| 44.0121162 | 1.16764997 | 0.53725954 | 2.17334431 | 0.02975441 | 0.09856449 | Microbacteriaceae   | FastDNA vs QIAstool          |
| 3.5697885  | 2.04025878 | 0.94204076 | 2.1657861  | 0.03032754 | 0.09856449 | Beutenbergiaceae    | FastDNA vs QIAstool          |
| 38.1375375 | 1.28724283 | 0.57931343 | 2.22201449 | 0.02628233 | 0.09873631 | Procabacteriaceae   | QIAstool vs QIAstool+BB      |
| 283.625111 | 1.51356979 | 0.66399228 | 2.27949907 | 0.02263742 | 0.09878145 | Lactobacillaceae    | PowerSoil.HMP vs MagNAPure   |
| 70.3986464 | 0.85713572 | 0.41436171 | 2.06856886 | 0.03858656 | 0.09879332 | Desulfovibrionaceae | EasyDNA vs QIAstool+BB       |
| 4.87640195 | 2.25110021 | 1.09119838 | 2.06296146 | 0.03911629 | 0.09879332 | Corynebacteriaceae  | EasyDNA vs QIAstool+BB       |
| 1.41904526 | 2.24885942 | 1.09088645 | 2.06149725 | 0.03925563 | 0.09879332 | Dehalobacteriaceae  | EasyDNA vs QIAstool+BB       |
| 4.46443875 | 1.94043662 | 0.89629733 | 2.16494746 | 0.03039171 | 0.09896787 | Xanthobacteraceae   | PowerSoil.HMP vs QIAstool    |
| 28.7248963 | -1.2327152 | 0.56097099 | -2.1974669 | 0.02798712 | 0.09899147 | Acetobacteraceae    | EasyDNA vs QIAstool          |
| 38.1375375 | -1.3782365 | 0.62635739 | -2.2003995 | 0.02777856 | 0.09900564 | Procabacteriaceae   | InnuPURE vs QIAstool         |
| 7.94601326 | 2.49871504 | 0.90484448 | 2.76148565 | 0.0057539  | 0.09925485 | Micrococcaceae      | InnuPURE vs MagNAPure        |
| 13.1651756 | -1.6658237 | 0.76085582 | -2.1894078 | 0.02856721 | 0.09927107 | Helicobacteraceae   | InnuPURE vs QIAstool         |
| 224.417038 | -1.0205732 | 0.44198438 | -2.3090707 | 0.02093966 | 0.09943231 | Caulobacteraceae    | FastDNA vs MagNAPure         |
| 1756.14884 | -0.8783179 | 0.38202572 | -2.2991067 | 0.02149888 | 0.09943231 | Neisseriaceae       | FastDNA vs MagNAPure         |
| 49.8040986 | 1.32588889 | 0.5667839  | 2.33931996 | 0.01931888 | 0.09949224 | Actinomycetaceae    | QIAstool+BB vs MagNAPure     |
| 1756.14884 | -0.7194269 | 0.35366435 | -2.034208  | 0.04193062 | 0.09951465 | Neisseriaceae       | EasyDNA vs PowerSoil.HMP     |
| 10.9576795 | -1.5130076 | 0.74448962 | -2.0322749 | 0.04212583 | 0.09951465 | Acholeplasmataceae  | EasyDNA vs PowerSoil.HMP     |
| 1.41904526 | 2.33278776 | 1.06856001 | 2.18311347 | 0.02902745 | 0.09977434 | Dehalobacteriaceae  | EasyDNA vs InnuPURE          |
| 4.87640195 | 2.35164946 | 1.07956479 | 2.17833102 | 0.0293814  | 0.09977434 | Corynebacteriaceae  | EasyDNA vs InnuPURE          |
| 15.0781299 | 1.47004964 | 0.68024796 | 2.16104968 | 0.0306915  | 0.09985342 | [Odoribacteraceae]  | EasyDNA vs InnuPURE          |
| 60.913589  | -0.9475891 | 0.43964149 | -2.1553677 | 0.03113307 | 0.09985342 | SB-1                | EasyDNA vs InnuPURE          |
| 1.54406709 | -2.3845863 | 1.10706543 | -2.1539706 | 0.03124248 | 0.09985342 | Mycobacteriaceae    | EasyDNA vs InnuPURE          |
